# Supplementary material for: Highly stereoselective and enantiodivergent synthesis of cyclopropylphosphonates with engineered carbene transferases
Source: Royal Society of Chemistry journal article supplement (doi:10.1039/d2sc01965e), 2022-01-01
Supplement: d2sc01965e1.pdf [file d2sc01965e1.pdf]

*Supporting Information for*

**Highly Stereoselective and Enantiodivergent Synthesis of Cyclopropylphosphonates with Engineered Carbene Transferases.**

Xinkun Ren<sup>a,b</sup>, Ajay L. Chandgude<sup>a</sup>, Daniela M. Carminati<sup>a</sup>, Zhuofan Shen<sup>c</sup>, Sagar D. Khare<sup>c</sup>, and Rudi Fasan<sup>a,\*</sup>

<sup>a</sup> *Department of Chemistry, University of Rochester, Rochester, New York 14627, United States*

<sup>b</sup> *Current address: College of Engineering and Applied Sciences, Nanjing University, Nanjing, Jiangsu Province 210023, China*

<sup>c</sup> *Department of Chemistry and Chemical Biology, Rutgers University, New Brunswick, New Jersey 08854, United States*

*Correspondence should be addressed to R.F. (rfasan@ur.rochester.edu)*

**Table of Contents**

|                                                         |               |
|---------------------------------------------------------|---------------|
| Supplementary Tables S1-S7                              | Pages S2-S14  |
| Supplementary Figures S1-S8                             | Pages S15-S32 |
| Experimental Procedures                                 | Pages S33-S37 |
| Computational Studies (and Table S8)                    | Pages S38-S39 |
| Synthetic Procedures and Compound Characterization Data | Pages S40-S48 |
| Crystallographic Analyses                               | Pages S49-S50 |
| NMR Spectra                                             | Pages S51-S74 |
| Atom Coordinates                                        | Page S75-S87  |
| References                                              | Page S88-S89  |

**Table S1.** Activity of hemin and hemoproteins in the intermolecular cyclopropanation of styrene (**2a**) and dimethyl (diazomethyl)phosphonate (**1**).

Reaction scheme: Styrene (**2a**) + Dimethyl (diazomethyl)phosphonate (**1**)  $\xrightarrow[\text{KPi buffer (pH 7), RT, anaerobic}]{\text{Hemoprotein, Na}_2\text{S}_2\text{O}_4}$  Cyclopropanated products (**3a**, **4a**)

The products are shown as two diastereomers: *trans* (3a and 4a) and *cis* (3a and 4a).

| Entry | Catalyst                                                    | Yield <sup>a</sup> | TON | % <i>de</i> <sub>trans</sub> <sup>b</sup> | % <i>ee</i> <sub>(1<i>S</i>, 2<i>R</i>)</sub> <sup>c</sup> |
|-------|-------------------------------------------------------------|--------------------|-----|-------------------------------------------|------------------------------------------------------------|
| 1     | Hemin                                                       | 0%                 | 0   | n.d.                                      | n.d.                                                       |
| 2     | Mb                                                          | 0.4%               | 1   | 90                                        | n.d.                                                       |
| 3     | Mb(H64V,V68A)                                               | 1.6%               | 2   | >99                                       | 98                                                         |
| 4     | Catalase                                                    | 0%                 | 0   | n.d.                                      | n.d.                                                       |
| 5     | Cytochrome <i>c</i> (equine heart)                          | 0%                 | 0   | n.d.                                      | n.d.                                                       |
| 6     | Cytochrome <i>c</i> ( <i>Hydrogenobacter thermophilus</i> ) | 0%                 | 0   | n.d.                                      | n.d.                                                       |
| 7     | P450 <sub>BM3</sub>                                         | 1%                 | 1   | 95                                        | n.d.                                                       |
| 8     | P450 XplA                                                   | 23%                | 28  | 82                                        | -33                                                        |
| 9     | P450 BezE                                                   | 3.7%               | 5   | 93                                        | 15                                                         |

Reaction conditions: 20  $\mu$ M catalyst, 2.5 mM dimethyl (diazomethyl)phosphonate (**1**), 5 mM styrene (**2a**), 10 mM Na<sub>2</sub>S<sub>2</sub>O<sub>4</sub>, in KPi buffer (50 mM, pH 7), room temperature, 12 hours, in anaerobic chamber. [a] Yield, diastereomeric and enantiomeric excesses determined by chiral GC-FID analysis using 1,3-benzodioxole as internal standard and calibration curve with authentic **3a/4a** standards. [b] % *de* values: (*trans* - *cis*)/(*trans* + *cis*). [c] % *ee*<sub>(1*S*, 2*R*)</sub> values: [(1*S*,2*R*) - (1*R*,2*S*)]/[(1*S*,2*R*) + (1*R*,2*S*)].

**Table S2.** Activity and selectivity of representative Mb variants for the intermolecular cyclopropanation of styrene (**2a**) and dimethyl (diazomethyl)phosphonate (**1**) in initial screening.

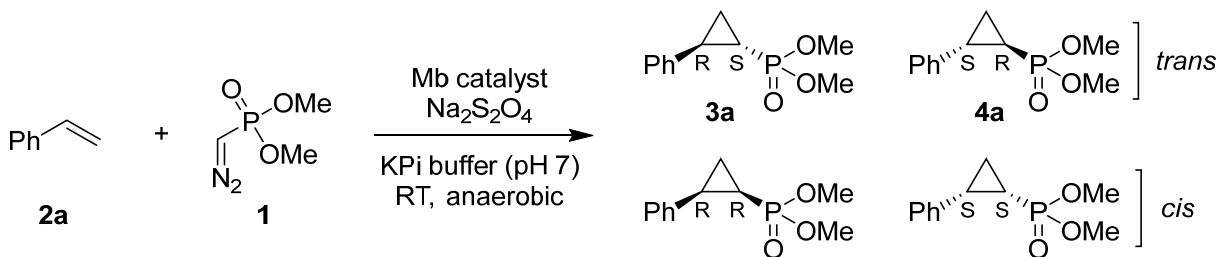

| Entry | Mutations      | Conversion <sup>a</sup> | TON | % <i>de</i> <sub>trans</sub> <sup>b</sup> | % <i>ee</i> <sub>(1<i>S</i>,2<i>R</i>)</sub> <sup>c</sup> |
|-------|----------------|-------------------------|-----|-------------------------------------------|-----------------------------------------------------------|
| 1     | -              | 0.4%                    | 1   | 90                                        | n.d.                                                      |
| 2     | H64V           | 3%                      | 4   | 94                                        | 5                                                         |
| 3     | H64G           | 0%                      | 0   | n.d.                                      | n.d.                                                      |
| 4     | H64A           | >1%                     | 1   | 97                                        | 98                                                        |
| 5     | V68G           | 3%                      | 4   | 99                                        | 55                                                        |
| 6     | V68A           | 4%                      | 4   | 99                                        | 89                                                        |
| 7     | V68F           | 0%                      | 0   | n.d.                                      | n.d.                                                      |
| 8     | F43A           | 0%                      | 0   | n.d.                                      | n.d.                                                      |
| 9     | H64G/V68A      | 67%                     | 83  | 99                                        | 99                                                        |
| 10    | F43C/H64V/V68A | 4%                      | 5   | 93                                        | 88                                                        |
| 11    | F43L/H64V/V68A | 7%                      | 9   | 99                                        | 67                                                        |
| 12    | F43Y/H64V/V68A | 8%                      | 10  | 97                                        | 85                                                        |
| 13    | L29F/H64V/V68A | 2%                      | 3   | 99                                        | 57                                                        |
| 14    | L29T/H64V      | 0%                      | 0   | n.d.                                      | n.d.                                                      |
| 15    | L29C/H64V      | 0%                      | 0   | n.d.                                      | n.d.                                                      |
| 16    | L29A/H64V      | 0%                      | 0   | n.d.                                      | n.d.                                                      |
| 17    | H64V/I107Y     | 0%                      | 0   | n.d.                                      | n.d.                                                      |
| 18    | H64V/I107S     | 1%                      | 1   | 80                                        | 85                                                        |
| 19    | H64V/I107A     | >1%                     | 0.3 | n.d.                                      | n.d.                                                      |
| 20    | F43I/H64V      | 0%                      | 0   | n.d.                                      | n.d.                                                      |

|    |                               |      |     |      |      |
|----|-------------------------------|------|-----|------|------|
| 21 | H64L/V68G/I107V               | 24%  | 30  | 99   | 95   |
| 22 | H64Y/V68G/I107V               | 13%  | 16  | 99   | 87   |
| 23 | F43L/H64L/V68G/I107F          | 13%  | 17  | 97   | 69   |
| 24 | H64A/V68G/I107A               | 4%   | 5   | 99   | 72   |
| 25 | H64A/V68G/I107V               | 14%  | 17  | 99   | 92   |
| 26 | H64A/V68G/I107F               | 16%  | 20  | 97   | 85   |
| 27 | H64L/V68G/I107F               | 30%  | 38  | 98   | 91   |
| 28 | H64V/V68A/I107L               | 17%  | 21  | 99   | 94   |
| 29 | F43L/H64A/V68G/I107V          | 12%  | 15  | 99   | 35   |
| 30 | F43Y/H64A/V68G/I107F          | 10%  | 13  | 90   | 81   |
| 31 | L29W/H64V/V68F                | 0%   | 0   | n.d. | n.d. |
| 32 | F43A/H64W/V68F                | 0%   | 0   | n.d. | n.d. |
| 33 | F43A/H64W/T67S/V68F           | 0%   | 0   | n.d. | n.d. |
| 34 | F43V/H64W                     | 0%   | 0   | n.d. | n.d. |
| 35 | L29F/F43V/V68F                | 0%   | 0   | n.d. | n.d. |
| 36 | L29F/F43S/H64W/V68L           | 0%   | 0   | n.d. | n.d. |
| 37 | L29F/F43S/H64F                | 0.2% | 0.2 | n.d. | n.d. |
| 38 | L29S/H64V/V68F (RR1)          | 2%   | 3   | 99   | -90  |
| 39 | L29T/H64V/V68L (RR2)          | 2%   | 2   | 99   | -83  |
| 40 | L29T/H64V/V68F (RR3)          | 6%   | 7   | 99   | -98  |
| 41 | L29T/H64V/V68F/I107L<br>(RR4) | 17%  | 22  | 99   | -99  |
| 42 | L29T/F43W/H64V/V68F<br>(RR5)  | 1%   | 2   | 99   | -73  |

Reaction conditions: 20  $\mu$ M catalyst, 5 mM styrene (**2a**), 2.5 mM dimethyl (diazomethyl)phosphonate (**1**), 10 mM Na<sub>2</sub>S<sub>2</sub>O<sub>4</sub>, in KPi buffer (50 mM, pH 7), room temperature, 12 hours, in anaerobic chamber. [a] Yield, diastereomeric and enantiomeric excesses determined by chiral GC-FID analysis using 1,3-benzodioxole as internal standard. [b] % *de* values: (*trans* - *cis*)/(*trans* + *cis*). [c] % *ee*<sub>(1*S*, 2*R*)</sub> values: [(1*S*, 2*R*) - (1*R*, 2*S*)]/[(1*S*, 2*R*) + (1*R*, 2*S*)].

**Table S3.** Activity and selectivity of evolved Mb variants for the intermolecular cyclopropanation of styrene (**2a**) and dimethyl (diazomethyl)phosphonate (**1**).

Reaction scheme: Styrene (**2a**) + Dimethyl (diazomethyl)phosphonate (**1**)  $\xrightarrow[\text{KPi buffer (pH 7), RT, anaerobic}]{\text{Mb catalyst, Na}_2\text{S}_2\text{O}_4}$  Cyclopropanated products (**3a**, **4a**, **3b**, **4b**).

| Entry | Mutations            | Conversion <sup>a</sup> | TON | % <i>de</i> <sub>trans</sub> <sup>b</sup> | % <i>ee</i> <sub>(1<i>S</i>,2<i>R</i>)</sub> <sup>c</sup> |
|-------|----------------------|-------------------------|-----|-------------------------------------------|-----------------------------------------------------------|
| 1     | (H64) V68A           | 4%                      | 4   | 99                                        | 89                                                        |
| 2     | H64V/V68A            | 1.6%                    | 2   | 99                                        | 98                                                        |
| 3     | H64A/V68A            | 30%                     | 37  | 99                                        | 98                                                        |
| 4     | H64G/V68A            | 67%                     | 83  | 99                                        | >99                                                       |
| 5     | (H64) V68G           | 3%                      | 4   | 99                                        | 55                                                        |
| 6     | H64V/V68G            | 13%                     | 16  | 99                                        | 97                                                        |
| 7     | H64A/V68G            | 18%                     | 23  | 99                                        | 79                                                        |
| 8     | H64A/V68G/I107L      | 35%                     | 44  | 99                                        | 97                                                        |
| 9     | H64V                 | 3%                      | 4   | 94                                        | 5                                                         |
| 10    | H64V/V68F            | 0.4%                    | 1   | 99                                        | -55                                                       |
| 11    | L29T/H64V/V68F       | 6%                      | 7   | 99                                        | -98                                                       |
| 12    | L29T/H64V/V68F/I107L | 17%                     | 22  | 99                                        | -99                                                       |

Reaction conditions: 20  $\mu$ M catalyst, 5 mM styrene (**2a**), 2.5 mM dimethyl (diazomethyl)phosphonate (**1**), 10 mM Na<sub>2</sub>S<sub>2</sub>O<sub>4</sub>, in KPi buffer (50 mM, pH 7), room temperature, 12 hours, in anaerobic chamber. [a] Yield, diastereomeric and enantiomeric excesses determined by chiral GC-FID analysis using 1,3-benzodioxole as internal standard. [b] % *de* values: (*trans* - *cis*)/(*trans* + *cis*). [c] % *ee*<sub>(1*S*,2*R*)</sub> values: [(1*S*,2*R*) - (1*R*,2*S*)]/[(1*S*,2*R*) + (1*R*,2*S*)].

**Table S4.** Optimization studies for Mb(H64G,V68A)-catalyzed intermolecular cyclopropanation of styrene (**2a**) and dimethyl (diazomethyl)phosphonate (**1**) in reactions with purified protein and Mb-expressing *E. coli* cells (C41(DE3)). Reaction conditions: 2.5-20 mM (diazomethyl)phosphonate (**1**), 2.5-40 mM styrene (**2a**), Mb purified protein or Mb-expressing *E. coli* cells (C41(DE3)) at the indicated cell density (OD<sub>600</sub>) in KPi buffer (50 mM, pH 7), room temperature, 12 hours in sealed crimp vials and in anaerobic chamber. Protein concentration in the whole cell solutions was 65 μM at an OD<sub>600</sub> of 100.

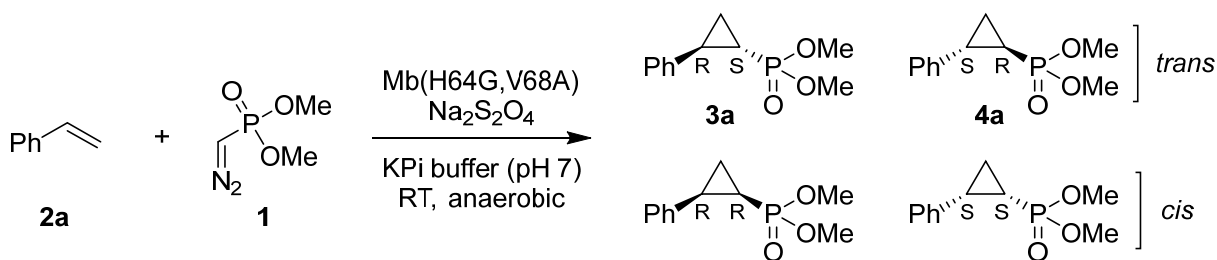

| Entry | Catalyst loading | [ <b>2a</b> ] (mM) | [ <b>1</b> ] (mM) | Yield (GC) <sup>a</sup> | TON | % <i>de</i> <sub>trans</sub> <sup>b</sup> | % <i>ee</i> <sub>(1<i>S</i>,2<i>R</i>)</sub> <sup>c</sup> |
|-------|------------------|--------------------|-------------------|-------------------------|-----|-------------------------------------------|-----------------------------------------------------------|
| 1     | 20 μM            | 10                 | 2.5               | 67%                     | 83  | >99                                       | >99                                                       |
| 2     | 20 μM            | 5                  | 2.5               | 67%                     | 83  | >99                                       | >99                                                       |
| 3     | 20 μM            | 2.5                | 2.5               | 62%                     | 77  | >99                                       | >99                                                       |
| 4     | 20 μM            | 10                 | 5                 | 47%                     | 118 | >99                                       | >99                                                       |
| 5     | 20 μM            | 5                  | 5                 | 49%                     | 122 | >99                                       | >99                                                       |
| 6     | 20 μM            | 2.5                | 5                 | 87%                     | 109 | >99                                       | >99                                                       |
| 7     | 20 μM            | 40                 | 10                | 36%                     | 180 | >99                                       | >99                                                       |
| 8     | 20 μM            | 20                 | 10                | 45%                     | 225 | >99                                       | >99                                                       |
| 9     | 20 μM            | 10                 | 10                | 46%                     | 230 | >99                                       | >99                                                       |
| 10    | 20 μM            | 5                  | 10                | 89%                     | 222 | >99                                       | >99                                                       |
| 11    | 20 μM            | 2.5                | 10                | 99%                     | 125 | >99                                       | >99                                                       |
| 12    | 10 μM            | 10                 | 20                | 47%                     | 470 | >99                                       | >99                                                       |
| 13    | 20 μM            | 10                 | 20                | 70%                     | 350 | >99                                       | >99                                                       |
| 14    | 40 μM            | 10                 | 20                | 99%                     | 250 | >99                                       | >99                                                       |
| 15    | 60 μM            | 10                 | 20                | 99%                     | 167 | >99                                       | >99                                                       |

|    |            |    |    |     |     |     |     |
|----|------------|----|----|-----|-----|-----|-----|
| 16 | 80 $\mu$ M | 10 | 20 | 99% | 125 | >99 | >99 |
| 17 | 10 $\mu$ M | 20 | 40 | 18% | 350 | >99 | >99 |
| 18 | 20 $\mu$ M | 20 | 40 | 33% | 330 | >99 | >99 |
| 19 | 40 $\mu$ M | 20 | 40 | 60% | 298 | >99 | >99 |
| 20 | 60 $\mu$ M | 20 | 40 | 70% | 232 | >99 | >99 |
| 21 | 80 $\mu$ M | 20 | 40 | 86% | 215 | >99 | >99 |
| 22 | OD=40      | 10 | 20 | 43% | 163 | >99 | >99 |
| 23 | OD=60      | 10 | 20 | 74% | 187 | >99 | >99 |
| 24 | OD=80      | 10 | 20 | 99% | 187 | >99 | >99 |
| 25 | OD=40      | 20 | 40 | 10% | 74  | >99 | >99 |
| 26 | OD=60      | 20 | 40 | 29% | 144 | >99 | >99 |
| 27 | OD=80      | 20 | 40 | 30% | 114 | >99 | >99 |

[a] Yield, diastereomeric and enantiomeric excesses determined by chiral GC-FID analysis using 1,3-benzodioxole as internal standard. [b] % *de* values:  $(trans - cis)/(trans + cis)$ . [c] % *ee*<sub>(1*S*,2*R*)</sub> values:  $[(1*S*,2*R*) - (1*R*,2*S*)]/[(1*S*,2*R*) + (1*R*,2*S*)]$ .

**Table S5.** Optimization studies for Mb(L29T, H64V, V68F, I107L)-catalyzed intermolecular cyclopropanation of styrene (**2a**) and dimethyl (diazomethyl)phosphonate (**1**) in reactions with purified protein and Mb-expressing *E. coli* cells (C41(DE3)). Reaction conditions: 2.5-20 mM (diazomethyl)phosphonate (**1**), 2.5-40 mM styrene (**2a**), Mb purified protein or Mb-expressing *E. coli* cells (C41(DE3)) at the indicated cell density (OD<sub>600</sub>) in KPi buffer (50 mM, pH 7), room temperature, 12 hours in sealed crimp vials and in anaerobic chamber. Protein concentration in the whole cell solutions was 52 μM at an OD<sub>600</sub> of 100.

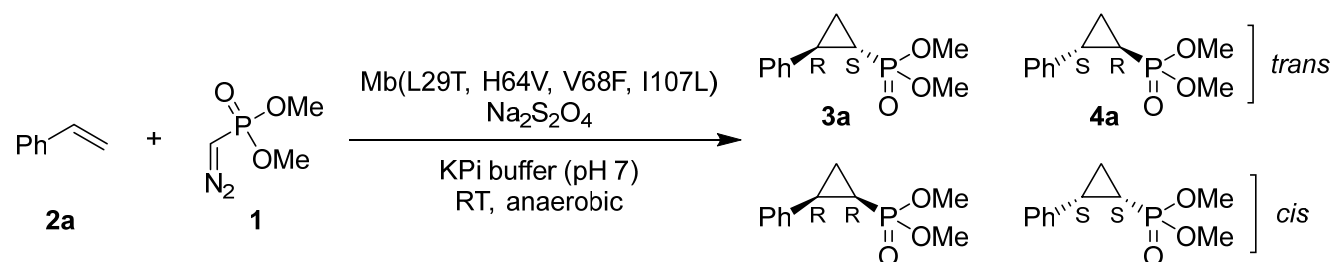

| Entry | Catalyst loading | 2a (mM) | 1 (mM) | Conversion <sup>a</sup> | TON | % <i>de</i> <sub>trans</sub> <sup>b</sup> | % <i>ee</i> <sub>(1S,2R)</sub> <sup>c</sup> |
|-------|------------------|---------|--------|-------------------------|-----|-------------------------------------------|---------------------------------------------|
| 1     | 20 μM            | 4       | 1      | 19%                     | 10  | >99                                       | -99                                         |
| 2     | 20 μM            | 2       | 1      | 21%                     | 11  | >99                                       | -99                                         |
| 3     | 20 μM            | 1       | 1      | 13%                     | 6   | >99                                       | -99                                         |
| 4     | 20 μM            | 0.5     | 1      | 23%                     | 6   | >99                                       | -99                                         |
| 5     | 20 μM            | 0.25    | 1      | 26%                     | 3   | >99                                       | -99                                         |
| 6     | 20 μM            | 10      | 2.5    | 17%                     | 21  | >99                                       | -99                                         |
| 7     | 20 μM            | 5       | 2.5    | 14%                     | 17  | >99                                       | -99                                         |
| 8     | 20 μM            | 2.5     | 2.5    | 11%                     | 14  | >99                                       | -99                                         |
| 9     | 20 μM            | 1.25    | 2.5    | 20%                     | 12  | >99                                       | -99                                         |
| 10    | 20 μM            | 0.62    | 2.5    | 29%                     | 9   | >99                                       | -99                                         |
| 11    | 20 μM            | 20      | 5      | 11%                     | 28  | >99                                       | -99                                         |
| 12    | 20 μM            | 10      | 5      | 12%                     | 29  | >99                                       | -99                                         |
| 13    | 20 μM            | 5       | 5      | 10%                     | 25  | >99                                       | -99                                         |
| 14    | 20 μM            | 2.5     | 5      | 18%                     | 22  | >99                                       | -99                                         |
| 15    | 20 μM            | 1.25    | 5      | 22%                     | 14  | >99                                       | -99                                         |



---

|    |            |     |    |      |     |     |     |
|----|------------|-----|----|------|-----|-----|-----|
| 16 | 20 $\mu$ M | 40  | 10 | 9%   | 45  | >99 | -99 |
| 17 | 20 $\mu$ M | 20  | 10 | 11%  | 57  | >99 | -99 |
| 18 | 20 $\mu$ M | 10  | 10 | 10%  | 52  | >99 | -99 |
| 19 | 20 $\mu$ M | 5   | 10 | 15%  | 37  | >99 | -99 |
| 20 | 20 $\mu$ M | 2.5 | 10 | 20%  | 25  | >99 | -99 |
| 21 | OD=10      | 0.5 | 1  | 9.8% | 9   | >99 | -99 |
| 22 | OD=20      | 0.5 | 1  | 10%  | 5   | >99 | -99 |
| 23 | OD=40      | 0.5 | 1  | 18%  | 4   | >99 | -99 |
| 24 | OD=60      | 0.5 | 1  | 21%  | 3   | >99 | -99 |
| 25 | OD=80      | 0.5 | 1  | 19%  | 2   | >99 | -99 |
| 26 | OD=100     | 0.5 | 1  | 23%  | 2   | >99 | -99 |
| 27 | OD=10      | 1   | 2  | 6%   | 12  | >99 | -99 |
| 28 | OD=20      | 1   | 2  | 13%  | 13  | >99 | -99 |
| 29 | OD=40      | 1   | 2  | 23%  | 11  | >99 | -99 |
| 30 | OD=60      | 1   | 2  | 24%  | 8   | >99 | -99 |
| 31 | OD=80      | 1   | 2  | 25%  | 6   | >99 | -99 |
| 32 | OD=100     | 1   | 2  | 27%  | 5   | >99 | -99 |
| 33 | OD=10      | 2.5 | 5  | 12%  | 57  | >99 | -99 |
| 34 | OD=20      | 2.5 | 5  | 16%  | 39  | >99 | -99 |
| 35 | OD=40      | 2.5 | 5  | 24%  | 29  | >99 | -99 |
| 36 | OD=60      | 2.5 | 5  | 28%  | 22  | >99 | -99 |
| 37 | OD=80      | 2.5 | 5  | 37%  | 22  | >99 | -99 |
| 38 | OD=100     | 2.5 | 5  | 44%  | 21  | >99 | -99 |
| 39 | OD=10      | 5   | 10 | 11%  | 107 | >99 | -99 |
| 40 | OD=20      | 5   | 10 | 23%  | 109 | >99 | -99 |
| 41 | OD=40      | 5   | 10 | 42%  | 101 | >99 | -99 |
| 42 | OD=60      | 5   | 10 | 57%  | 91  | >99 | -99 |
| 43 | OD=80      | 5   | 10 | 74%  | 89  | >99 | -99 |

---

---

|    |             |     |    |      |     |     |     |
|----|-------------|-----|----|------|-----|-----|-----|
| 44 | OD=100      | 5   | 10 | 96%  | 92  | >99 | -99 |
| 45 | OD=10       | 10  | 20 | 7.9% | 151 | >99 | -99 |
| 46 | OD=20       | 10  | 20 | 15%  | 144 | >99 | -99 |
| 47 | OD=40       | 10  | 20 | 28%  | 135 | >99 | -99 |
| 48 | OD=60       | 10  | 20 | 37%  | 119 | >99 | -99 |
| 49 | OD=80       | 10  | 20 | 44%  | 107 | >99 | -99 |
| 50 | OD=100      | 10  | 20 | 52%  | 101 | >99 | -99 |
| 51 | OD=10       | 20  | 40 | 1.8% | 71  | >99 | -99 |
| 52 | OD=20       | 20  | 40 | 5.0% | 96  | >99 | -99 |
| 53 | OD=40       | 20  | 40 | 9.8% | 94  | >99 | -99 |
| 54 | OD=60       | 20  | 40 | 13%  | 82  | >99 | -99 |
| 55 | OD=80       | 20  | 40 | 17%  | 82  | >99 | -99 |
| 56 | OD=100      | 20  | 40 | 20%  | 77  | >99 | -99 |
| 57 | 20 $\mu$ M  | 0.5 | 1  | 21%  | 5   | >99 | -99 |
| 58 | 40 $\mu$ M  | 0.5 | 1  | 42%  | 5   | >99 | -99 |
| 59 | 60 $\mu$ M  | 0.5 | 1  | 99%  | 8   | >99 | -99 |
| 60 | 80 $\mu$ M  | 0.5 | 1  | 99%  | 6   | >99 | -99 |
| 61 | 100 $\mu$ M | 0.5 | 1  | 99%  | 5   | >99 | -99 |
| 62 | 20 $\mu$ M  | 1   | 2  | 19%  | 9   | >99 | -99 |
| 63 | 40 $\mu$ M  | 1   | 2  | 23%  | 6   | >99 | -99 |
| 64 | 60 $\mu$ M  | 1   | 2  | 30%  | 5   | >99 | -99 |
| 65 | 80 $\mu$ M  | 1   | 2  | 68%  | 8   | >99 | -99 |
| 66 | 100 $\mu$ M | 1   | 2  | 91%  | 9   | >99 | -99 |
| 67 | 20 $\mu$ M  | 2.5 | 5  | 14%  | 17  | >99 | -99 |
| 68 | 40 $\mu$ M  | 2.5 | 5  | 31%  | 20  | >99 | -99 |
| 69 | 60 $\mu$ M  | 2.5 | 5  | 47%  | 20  | >99 | -99 |
| 70 | 80 $\mu$ M  | 2.5 | 5  | 50%  | 16  | >99 | -99 |

---

|    |             |     |    |     |    |     |     |
|----|-------------|-----|----|-----|----|-----|-----|
| 71 | 100 $\mu$ M | 2.5 | 5  | 60% | 15 | >99 | -99 |
| 72 | 20 $\mu$ M  | 5   | 10 | 12% | 31 | >99 | -99 |
| 73 | 40 $\mu$ M  | 5   | 10 | 26% | 33 | >99 | -99 |
| 74 | 60 $\mu$ M  | 5   | 10 | 37% | 31 | >99 | -99 |
| 75 | 80 $\mu$ M  | 5   | 10 | 48% | 30 | >99 | -99 |
| 76 | 100 $\mu$ M | 5   | 10 | 59% | 29 | >99 | -99 |
| 77 | 20 $\mu$ M  | 10  | 20 | 10% | 49 | >99 | -99 |
| 78 | 40 $\mu$ M  | 10  | 20 | 24% | 60 | >99 | -99 |
| 79 | 60 $\mu$ M  | 10  | 20 | 30% | 51 | >99 | -99 |
| 80 | 80 $\mu$ M  | 10  | 20 | 42% | 52 | >99 | -99 |
| 81 | 100 $\mu$ M | 10  | 20 | 51% | 51 | >99 | -99 |

[a] Yield, diastereomeric and enantiomeric excesses determined by chiral GC-FID analysis using 1,3-benzodioxole as internal standard. [b] % *de* values:  $(trans - cis)/(trans + cis)$ . [c] % *ee*<sub>(1*S*,2*R*)</sub> values:  $[(1*S*,2*R*) - (1*R*,2*S*)]/[(1*S*,2*R*) + (1*R*,2*S*)]$ .

**Table S6.** Activity and selectivity of evolved Mb variants for the intermolecular cyclopropanation of olefins (**2c-2e**, **2g-2h**, **2j-2l**) and dimethyl (diazomethyl)phosphonate (**1**).

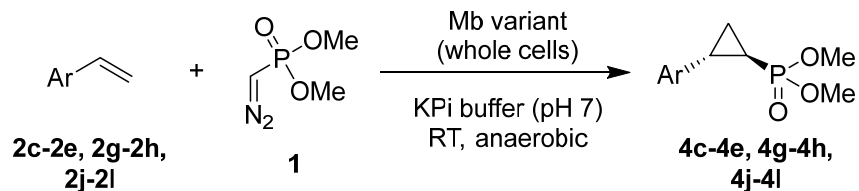

| Entry | Product | Catalyst      | Conversion <sup>a</sup> | % <i>de</i> <sub>trans</sub> <sup>b</sup> | % <i>ee</i> <sub>(1R,2S)</sub> <sup>c</sup> |
|-------|---------|---------------|-------------------------|-------------------------------------------|---------------------------------------------|
| 1     |         | RR4/T29C      | 67%                     | 99                                        | 84                                          |
|       |         | RR4/T29V      | 72%                     | 99                                        | 57                                          |
|       |         | RR4/T29C/V64A | 64%                     | 99                                        | 92                                          |
|       |         | RR4/T29V/V64A | 64%                     | 99                                        | 80                                          |
| 2     |         | RR4/T29C      | 50%                     | 99                                        | 71                                          |
|       |         | RR4/T29V      | 63%                     | 99                                        | 50                                          |
|       |         | RR4/T29C/V64A | 63%                     | 99                                        | 84                                          |
|       |         | RR4/T29V/V64A | 56%                     | 99                                        | 70                                          |
| 3     |         | RR4/T29C      | 21%                     | 99                                        | 32                                          |
|       |         | RR4/T29V      | 26%                     | 99                                        | 36                                          |
|       |         | RR4/T29C/V64A | 24%                     | 99                                        | 56                                          |
|       |         | RR4/T29V/V64A | 16%                     | 99                                        | 50                                          |
| 4     |         | RR4/T29C      | 28%                     | 99                                        | 66                                          |
|       |         | RR4/T29V      | 46%                     | 99                                        | 53                                          |
|       |         | RR4/T29C/V64A | 41%                     | 99                                        | 81                                          |
|       |         | RR4/T29V/V64A | 38%                     | 99                                        | 76                                          |
| 5     |         | RR4/T29C      | 67%                     | 58                                        | 86                                          |
|       |         | RR4/T29V      | 71%                     | 91                                        | 76                                          |
|       |         | RR4/T29C/V64A | 86%                     | 24                                        | 99                                          |
|       |         | RR4/T29V/V64A | 75%                     | 44                                        | 94                                          |

|   |                                                                                         |               |     |    |    |
|---|-----------------------------------------------------------------------------------------|---------------|-----|----|----|
| 6 | 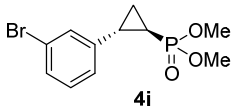<br>4j | RR4/T29C      | 66% | 35 | 90 |
|   |                                                                                         | RR4/T29V      | 99% | 94 | 89 |
|   |                                                                                         | RR4/T29C/V64A | 99% | 14 | 99 |
|   |                                                                                         | RR4/T29V/V64A | 99% | 49 | 99 |
| 7 | <br>4k | RR4/T29C      | 11% | 99 | 54 |
|   |                                                                                         | RR4/T29V      | 33% | 99 | 33 |
|   |                                                                                         | RR4/T29C/V64A | 7%  | 99 | 84 |
|   |                                                                                         | RR4/T29V/V64A | 24% | 99 | 83 |
| 8 | <br>4l | RR4/T29C      | 30% | 90 | 73 |
|   |                                                                                         | RR4/T29V      | 41% | 94 | 68 |
|   |                                                                                         | RR4/T29C/V64A | 45% | 86 | 94 |
|   |                                                                                         | RR4/T29V/V64A | 32% | 89 | 82 |

Reaction conditions: 10 mM (diazomethyl)phosphonate (**1**), 5 mM olefin (**2c-2e**, **2g-2h**, **2j-2l**), Mb-expressing *E. coli* cells ( $OD_{600}=100$ ) in KPi buffer (50 mM, pH 7), room temperature, 16 hours. [a] Yield, diastereomeric and enantiomeric excesses determined by chiral GC-FID analysis using 1,3-benzodioxole as internal standard. [b] % *de* values: (*trans* - *cis*)/(*trans* + *cis*). [c] % *ee*<sub>(1*R*,2*S*)</sub> values: [(1*R*,2*S*) - (1*S*,2*R*)]/[(1*S*,2*R*) + (1*R*,2*S*)].

**Table S7.** Sequences of the oligonucleotides used for the preparation of myoglobin variants by site saturation mutagenesis.

| <b>Entry</b> | <b>Oligonucleotide</b> | <b>Sequence (5'–3')</b>               |
|--------------|------------------------|---------------------------------------|
| 1            | XhoI Rev               | GGCTTTGTTAGCAGCCGGAT                  |
| 2            | H64NNK Fwd             | GAAGACCTGAAAAAANNKGGTGTTAC            |
| 3            | L29NNK Fwd             | GTCACGGTCAGGACATCANNKATCCGTCTGTTC     |
| 4            | V68NNK Fwd             | CCTGAAAAAACACGGTGTTACCNNKCTGACCGCT    |
| 5            | F43NNK Fwd             | CAC CCG GAAACCCTG GAAAAAANNKGACCGTTTC |
| 6            | I107NNK Fwd            | CCCGATCAAATACCTGGAGTTCNNKTCTGAAGCTATC |

**Figure S1.** Crystal structure of sperm whale myoglobin (Mb). The amino acid residues lining the distal heme pocket are highlighted as stick models in light blue. The heme group (yellow) and the heme-coordinating proximal histidine (green) are shown as stick models.

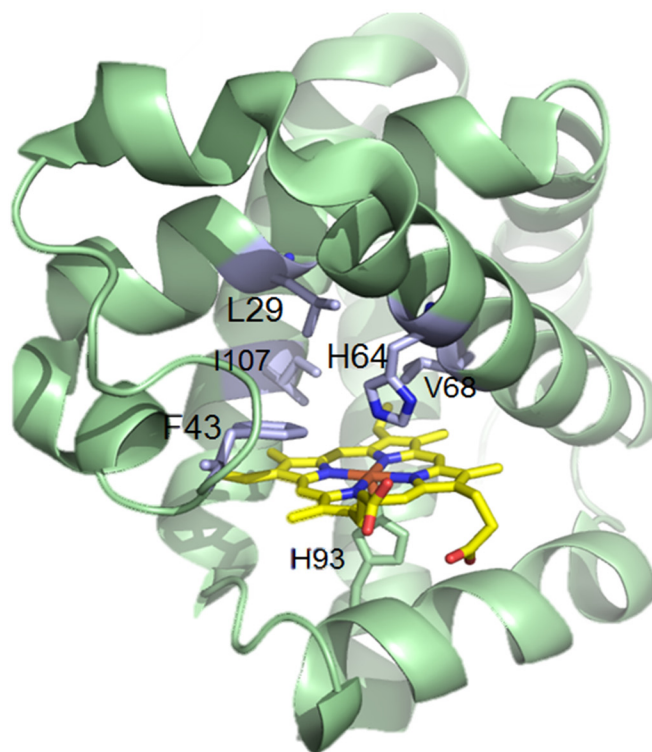

**Figure S2.** Time-course analysis of Mb(H64G,V68A)-catalyzed intermolecular cyclopropanation of styrene (**2a**) and dimethyl (diazomethyl)phosphonate (**1**).

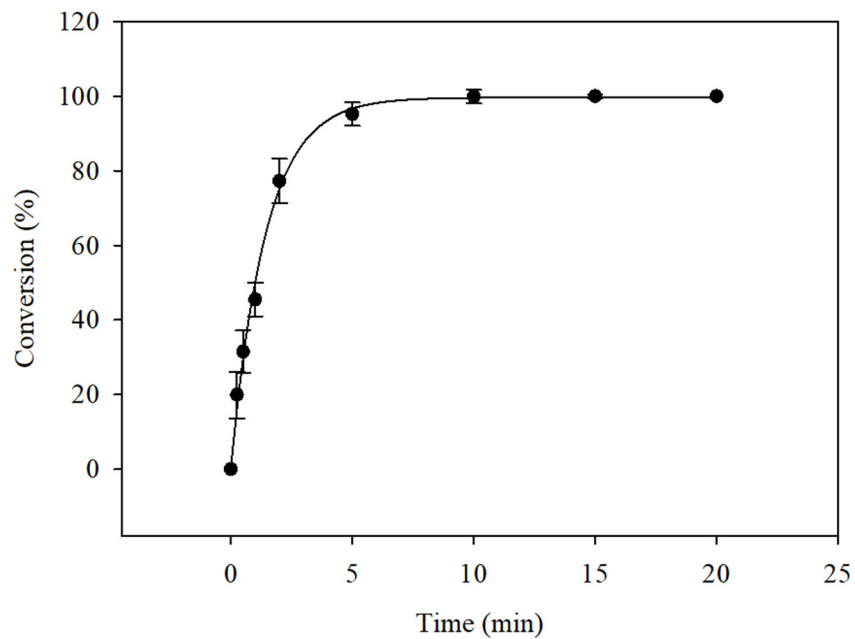

**Figure S3.** Time-course analysis of Mb(L29T,H64V,V68F,I107L)-catalyzed intermolecular cyclopropanation of styrene (**2a**) and dimethyl (diazomethyl)phosphonate (**1**).

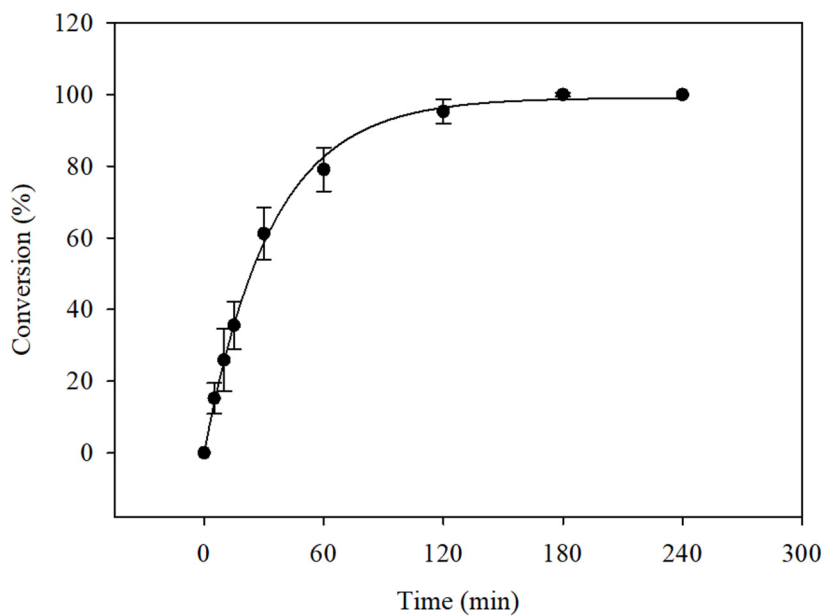



**Figure S4.** SFC analysis for the determination of an enantiomeric excess in the Mb-catalyzed intermolecular cyclopropanation reactions. The reference racemic samples were prepared as described in the experimental procedures.

- Chiral SFC analysis of racemic **3a/4a** (*top*) and enzymatically produced **3a** (*middle*) and **4a** product (*bottom*):

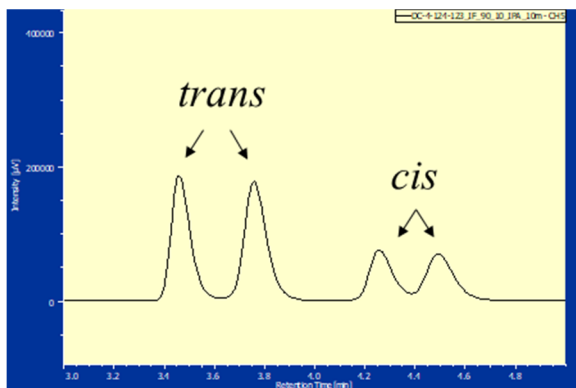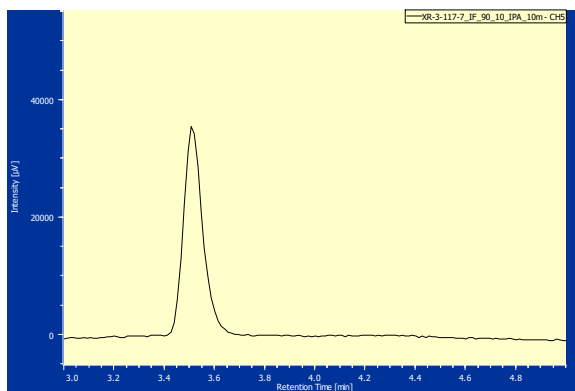

|           | Retention time/min | Peak area | Percent age |
|-----------|--------------------|-----------|-------------|
| <b>3a</b> | 3.45               | 327645    | 100%        |
| <b>4a</b> | 3.82               | 0         | 0%          |

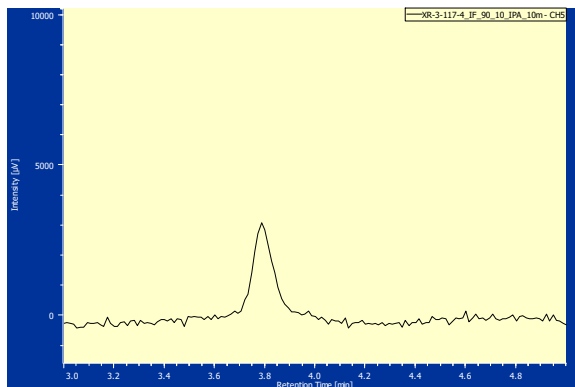

|           | Retention time/min | Peak area | Percent age |
|-----------|--------------------|-----------|-------------|
| <b>3a</b> | 3.45               | 0         | 0%          |
| <b>4a</b> | 3.82               | 120635    | 100%        |

- Chiral SFC analysis of racemic **3b/4b** (*top*) and enzymatically produced **3b** (*middle*) and **4b** products (*bottom*):

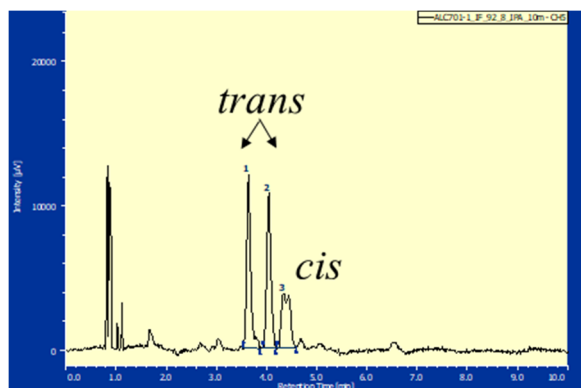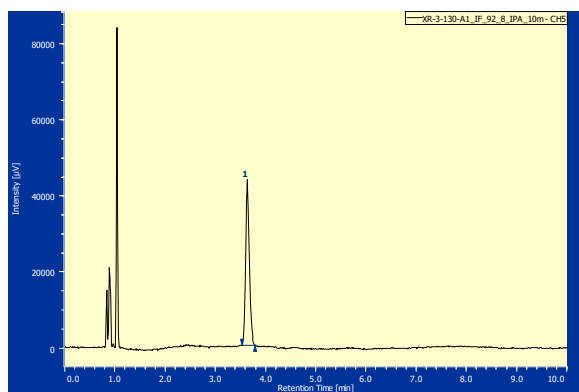

|           | Retention time/min | Peak area | Percent age |
|-----------|--------------------|-----------|-------------|
| <b>3b</b> | 3.63               | 227823    | 100%        |
| <b>4b</b> | 4.05               | 0         | 0%          |

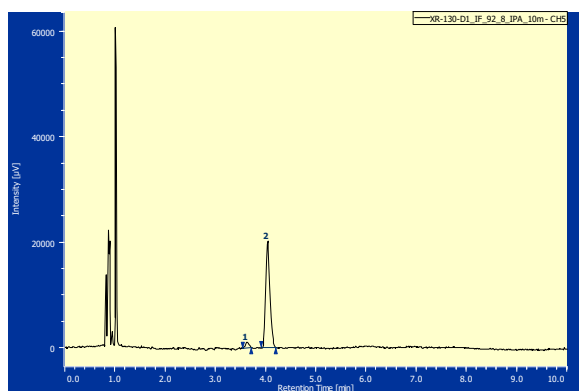

|           | Retention time/min | Peak area | Percent age |
|-----------|--------------------|-----------|-------------|
| <b>3b</b> | 3.63               | 5863      | 4.6%        |
| <b>4b</b> | 4.05               | 120696    | 95.2%       |

- Chiral SFC analysis of racemic **3c/4c** (*top*), enzymatically produced **3c** (*middle*) and **4c** products (*bottom*):

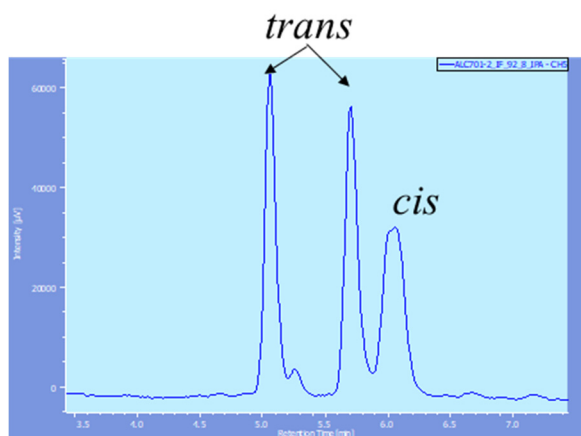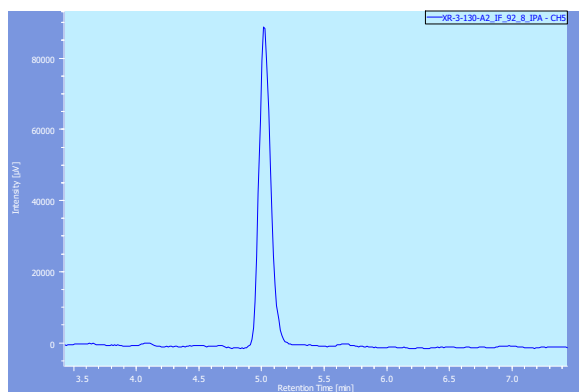

|           | Retention time/min | Peak area | Percent age |
|-----------|--------------------|-----------|-------------|
| <b>3c</b> | 5.04               | 565787    | 100%        |
| <b>4c</b> | 5.68               | 0         | 0%          |

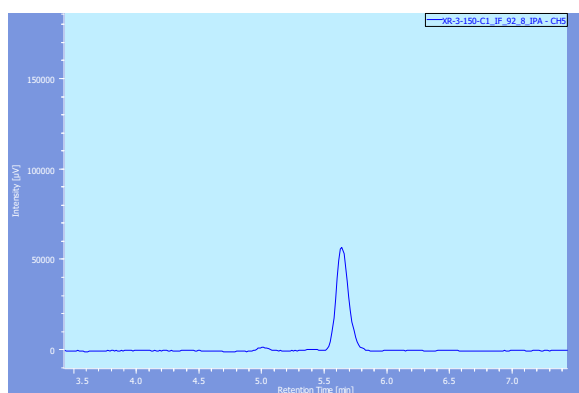

|           | Retention time/min | Peak area | Percent age |
|-----------|--------------------|-----------|-------------|
| <b>3c</b> | 5.04               | 14088     | 3.4%        |
| <b>4c</b> | 5.68               | 404425    | 96.6%       |

- Chiral SFC analysis of enzymatically produced racemic **3d/4d** (*top*), enzymatically produced **3d** (*middle*) and **4d** products (*bottom*):

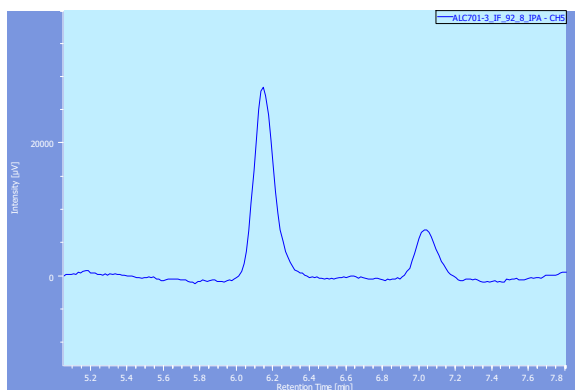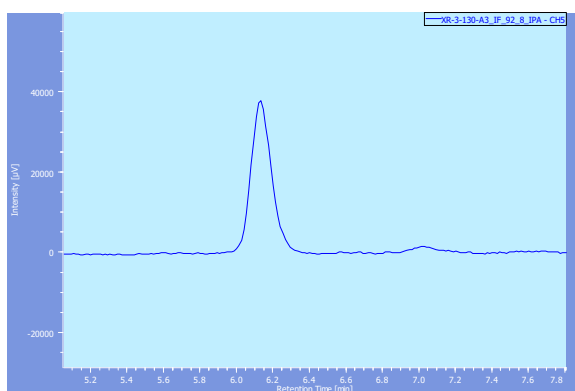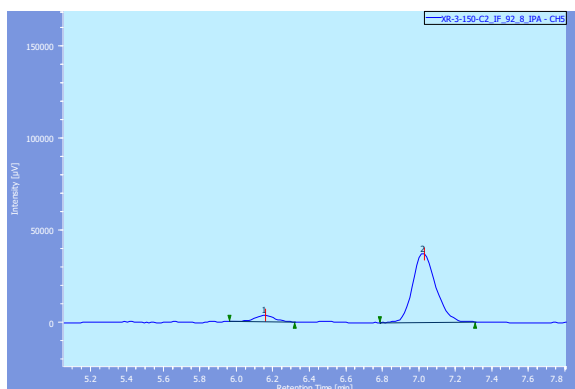

|           | Retention time/min | Peak area | Percent age |
|-----------|--------------------|-----------|-------------|
| <b>3d</b> | 6.16               | 461079    | 100%        |
| <b>4d</b> | 7.07               | 0         | 0%          |

|           | Retention time/min | Peak area | Percent age |
|-----------|--------------------|-----------|-------------|
| <b>3d</b> | 6.16               | 26728     | 7.5%        |
| <b>4d</b> | 7.07               | 330632    | 92.5%       |

- Chiral SFC analysis of racemic **3e/4e** (*top*), enzymatically produced **3e** (*middle*) and **4e** products (*bottom*):

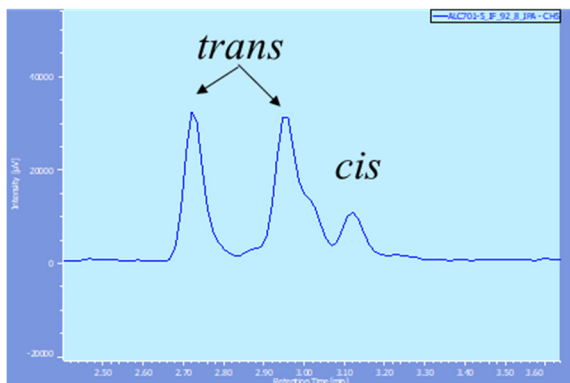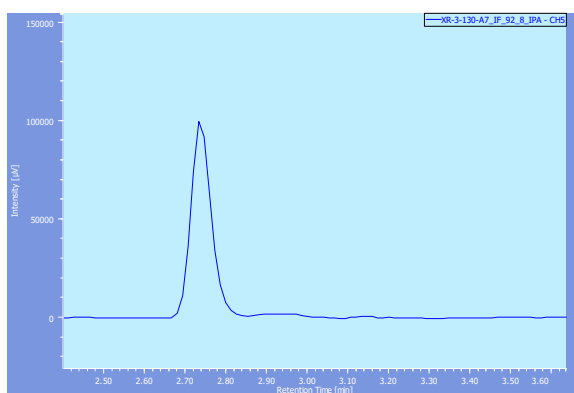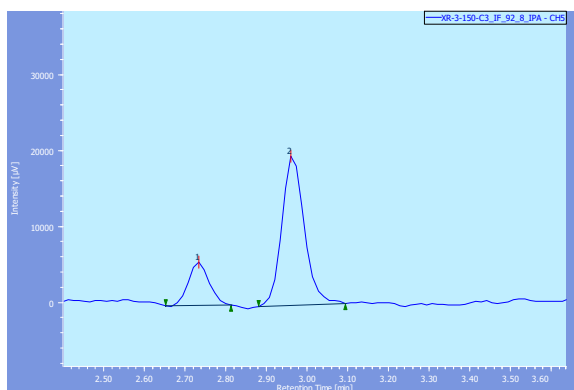

|           | Retention time/min | Peak area | Percent age |
|-----------|--------------------|-----------|-------------|
| <b>3e</b> | 2.74               | 287613    | 99%         |
| <b>4e</b> | 2.98               | 3106      | 1%          |

|           | Retention time/min | Peak area | Percent age |
|-----------|--------------------|-----------|-------------|
| <b>3e</b> | 2.74               | 20301     | 22.5%       |
| <b>4e</b> | 2.98               | 75758     | 77.5%       |

- Chiral SFC analysis of racemic **3f/4f** (*top*), enzymatically produced **3f** (*middle*) and **4f** products (*bottom*):

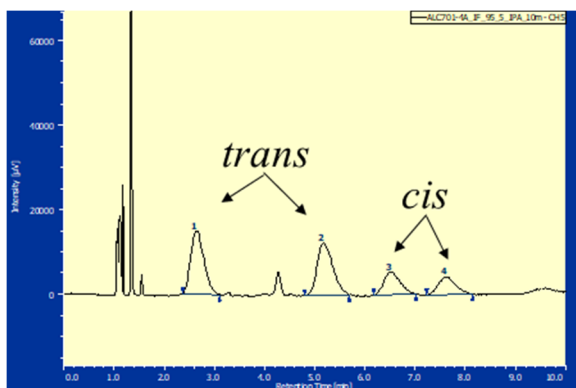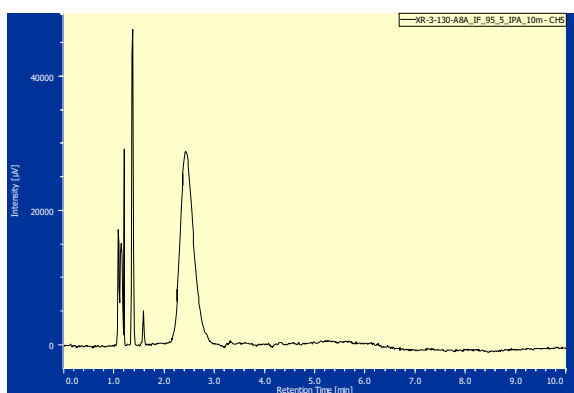

|           | Retention time/min | Peak area | Percent age |
|-----------|--------------------|-----------|-------------|
| <b>3f</b> | 2.64               | 49906     | 100%        |
| <b>4f</b> | 5.16               | 0         | 0%          |

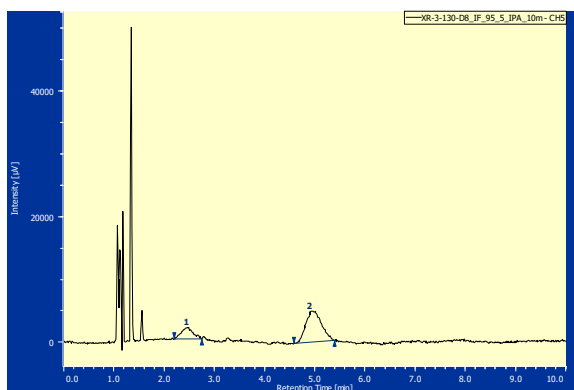

|           | Retention time/min | Peak area | Percent age |
|-----------|--------------------|-----------|-------------|
| <b>3f</b> | 2.64               | 28113     | 20.7%       |
| <b>4f</b> | 5.16               | 107715    | 79.3%       |

- Chiral SFC analysis of racemic **3g/4g** (*top*), enzymatically produced **3g** (*middle*) and **4g** products (*bottom, retention time was slightly shifted*):

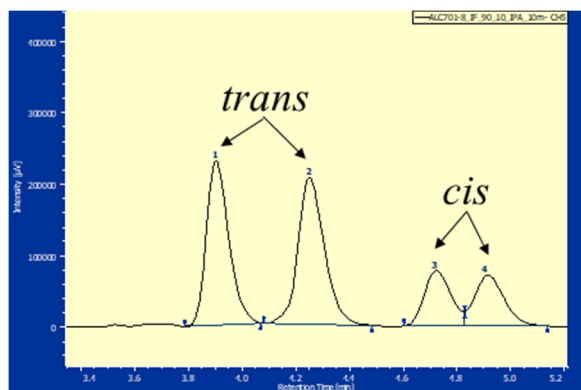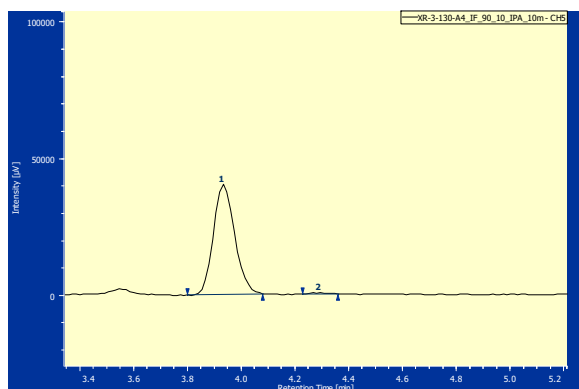

|           | Retention time/min | Peak area | Percent age |
|-----------|--------------------|-----------|-------------|
| <b>3g</b> | 3.91               | 221391    | 99.5%       |
| <b>4g</b> | 4.25               | 1092      | 0.5%        |

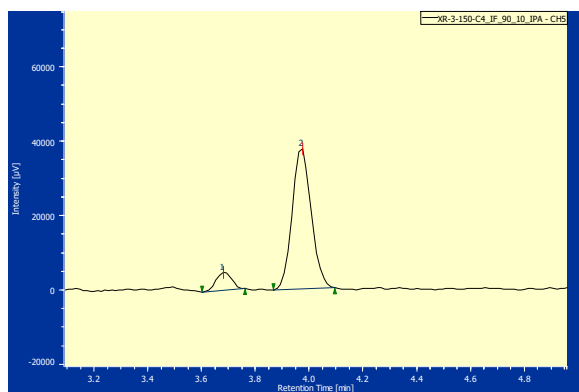

|           | Retention time/min | Peak area | Percent age |
|-----------|--------------------|-----------|-------------|
| <b>3g</b> | 3.68               | 19398     | 9.5%        |
| <b>4g</b> | 3.97               | 185430    | 90.5%       |

- Chiral SFC analysis of racemic **3h/4h** (*top*), enzymatically produced **3h** (*middle*) and **4h** products (*bottom*):

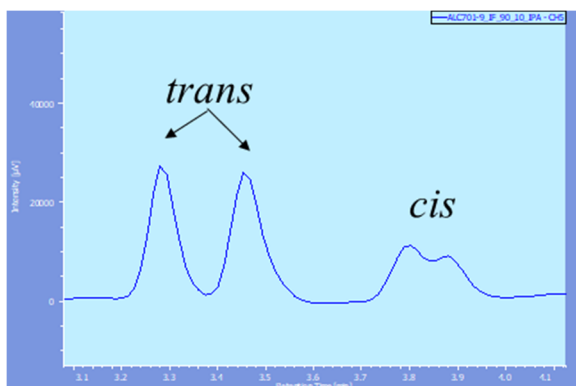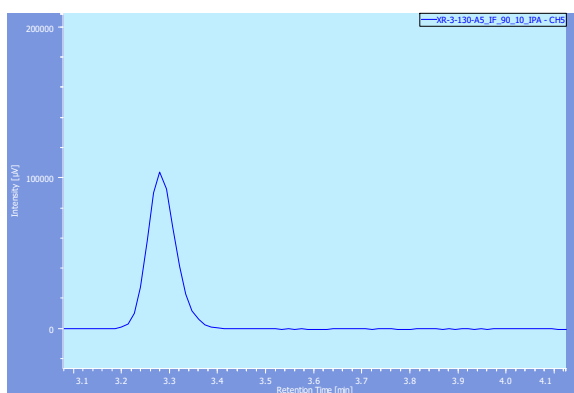

|           | Retention time/min | Peak area | Percent age |
|-----------|--------------------|-----------|-------------|
| <b>3h</b> | 3.30               | 359904    | 100%        |
| <b>4h</b> | 3.47               | 0         | 0%          |

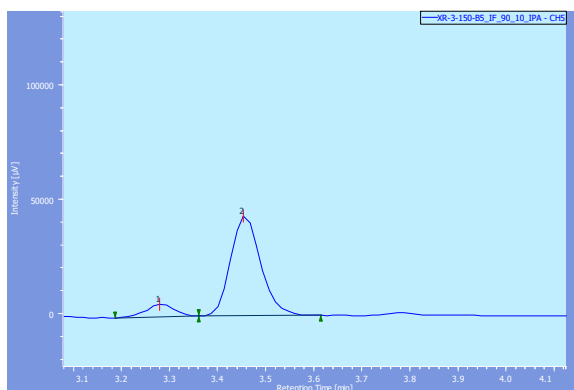

|           | Retention time/min | Peak area | Percent age |
|-----------|--------------------|-----------|-------------|
| <b>3h</b> | 3.30               | 22703     | 10.7%       |
| <b>4h</b> | 3.47               | 188556    | 89.3%       |



- Chiral SFC analysis of racemic **3i/4i** (*top*), enzymatically produced **3i** (*middle*) and **4i** products (*bottom*):

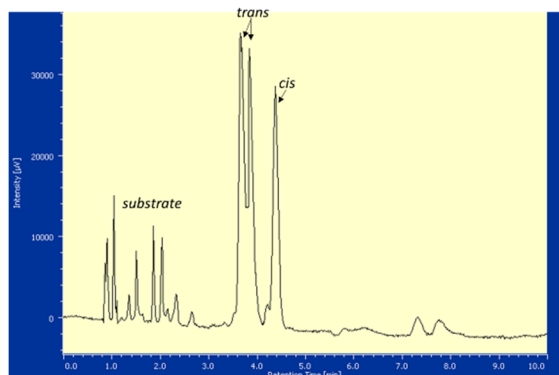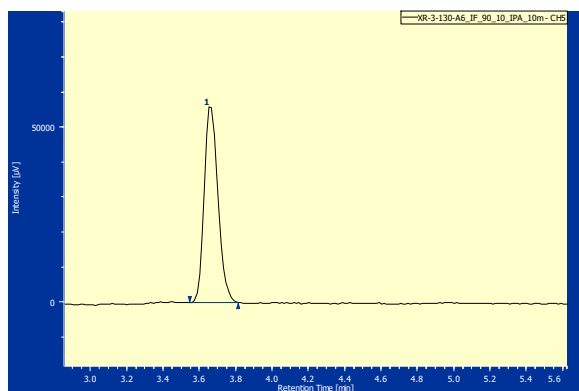

|           | Retention time/min | Peak area | Percent age |
|-----------|--------------------|-----------|-------------|
| <b>3i</b> | 3.65               | 296943    | 100%        |
| <b>4i</b> | 3.76               | 0         | 0%          |

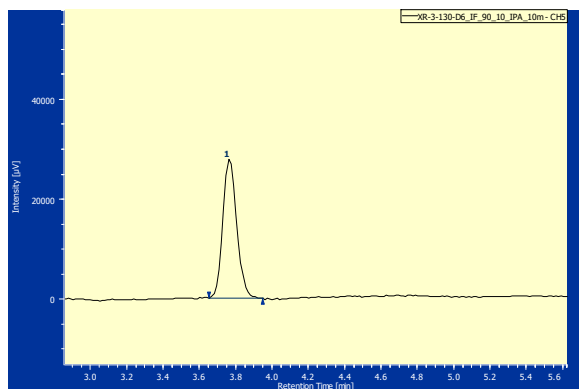

|           | Retention time/min | Peak area | Percent age |
|-----------|--------------------|-----------|-------------|
| <b>3i</b> | 3.65               | 0         | 0%          |
| <b>4i</b> | 3.76               | 147195    | 100%        |

- Chiral SFC analysis of racemic **3j/4j** (*top*), enzymatically produced **3j** (*middle*) and **4j** products (*bottom*):

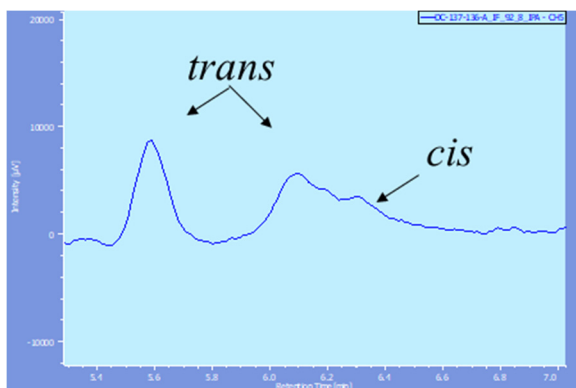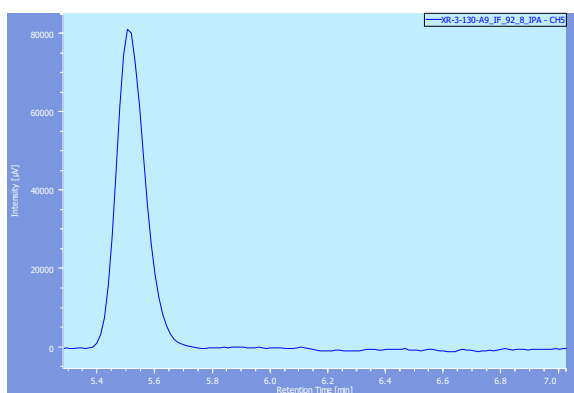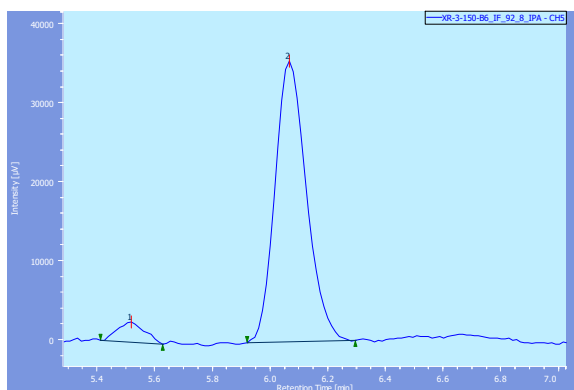

|           | Retention time/min | Peak area | Percent age |
|-----------|--------------------|-----------|-------------|
| <b>3j</b> | 5.50               | 374838    | 100%        |
| <b>4j</b> | 6.09               | 0         | 0%          |

|           | Retention time/min | Peak area | Percent age |
|-----------|--------------------|-----------|-------------|
| <b>3j</b> | 5.50               | 16480     | 5.8%        |
| <b>4j</b> | 6.09               | 268847    | 94.2%       |

- Chiral SFC analysis of racemic **3k/4k** (*top*), enzymatically produced **3k** (*middle*) and **4k** products (*bottom*):

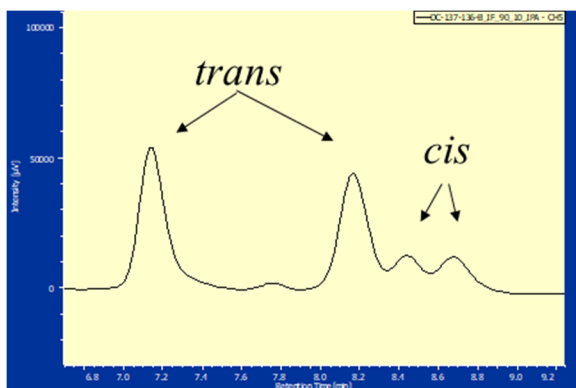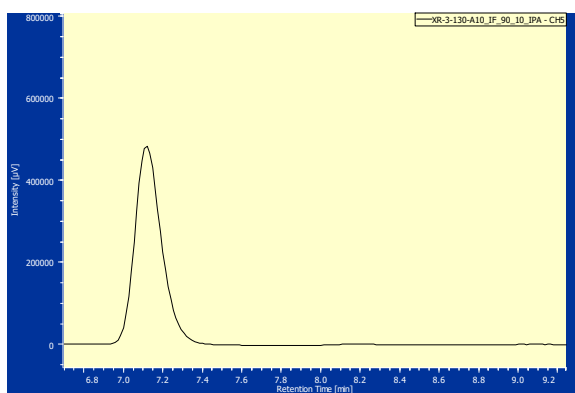

|           | Retention time/min | Peak area | Percentage |
|-----------|--------------------|-----------|------------|
| <b>3k</b> | 7.16               | 3958617   | 99.6%      |
| <b>4k</b> | 8.20               | 16158     | 0.4%       |

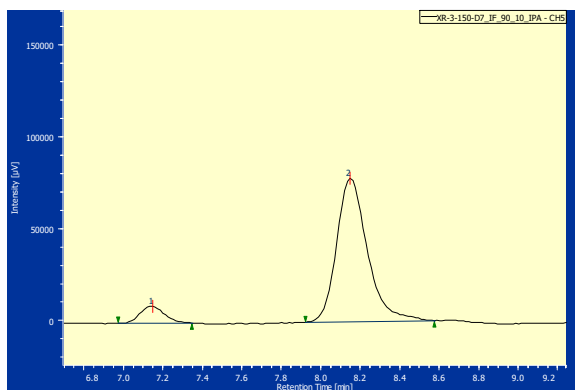

|           | Retention time/min | Peak area | Percentage |
|-----------|--------------------|-----------|------------|
| <b>3k</b> | 7.16               | 79136     | 8.6%       |
| <b>4k</b> | 8.20               | 841944    | 91.4%      |

- Chiral SFC analysis of racemic **3I/4I** (*top*), enzymatically produced **3I** (*middle*) and **4I** products (*bottom*):

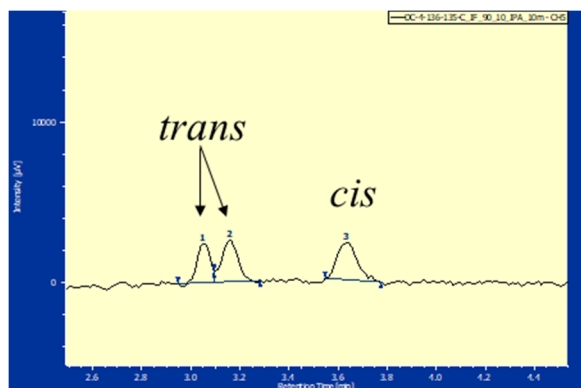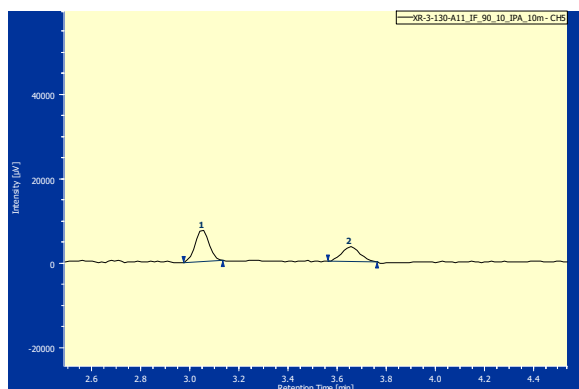

|           | Retention time/min | Peak area | Percent age |
|-----------|--------------------|-----------|-------------|
| <b>3I</b> | 3.05               | 29661     | 100%        |
| <b>4I</b> | 3.16               | 0         | 0%          |

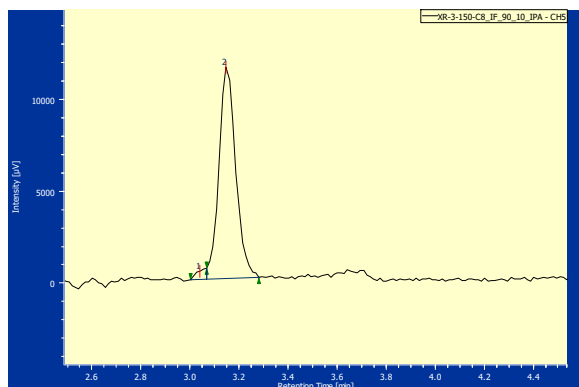

|           | Retention time/min | Peak area | Percent age |
|-----------|--------------------|-----------|-------------|
| <b>3I</b> | 3.05               | 1522      | 2.7%        |
| <b>4I</b> | 3.16               | 54328     | 97.3%       |

**Figure S5.** ORTEP of dimethyl ((*1S,2R*)-2-(4'-methoxy-[1,1'-biphenyl]-4-yl)cyclopropyl)-phosphonate (**3da**) with ellipsoids drawn at the 50% probability level. Hydrogen atoms were located in the difference Fourier map and refined freely. They are represented here as spheres of arbitrary radius for clarity.

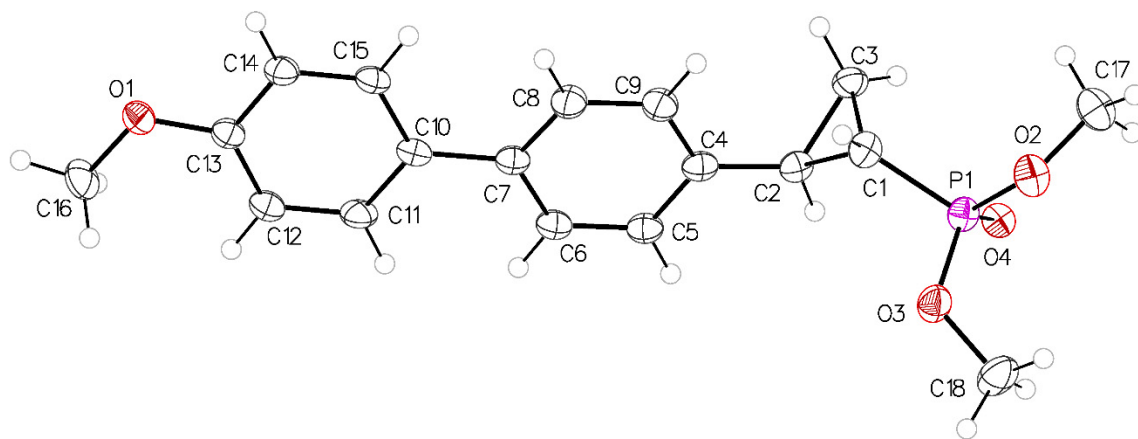

**Figure S6.** Mechanistic investigations using isotopically labeled substrate *cis*- $\beta$ -deuterostyrene (**cis-d-2a**). (a-b) Overlay plot of the  $^2\text{H}$  and  $^1\text{H}$  NMR spectrum of the cyclopropanation product from the Mb(H64G,V68A)-catalyzed reaction with **cis-d-2a** and dimethyl (diazomethyl)phosphonate (**1**) showing the formation of only **3aa**. The  $^1\text{H}$  NMR spectrum of the protiated cyclopropanation product **3a** is included as reference (panel c). Spectra were recorded using a 400 MHz instrument in  $\text{CDCl}_3/\text{CD}_3\text{OD}$  (1:1).

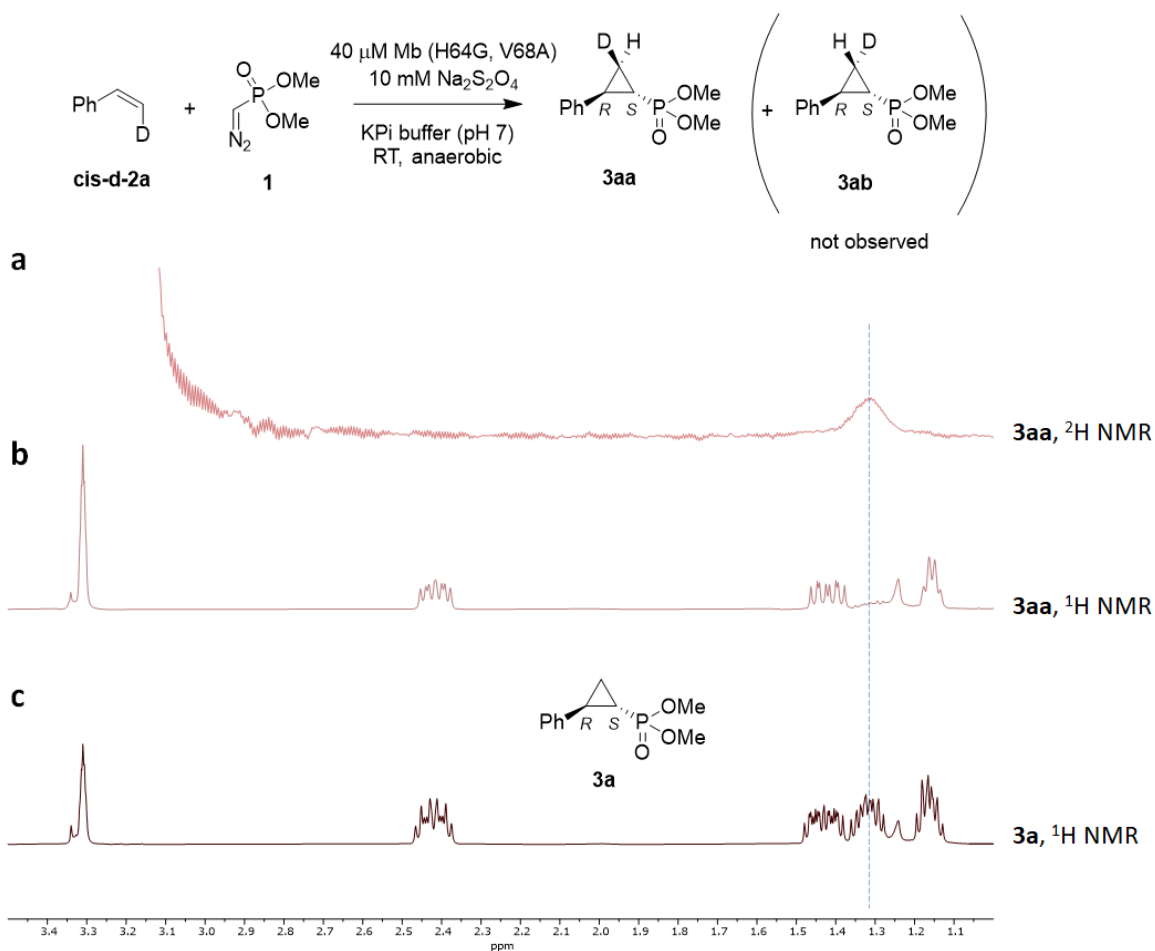

**Figure S7.** Circular dichroism spectra of compounds **3a** and **3c** (1 mM in methanol)

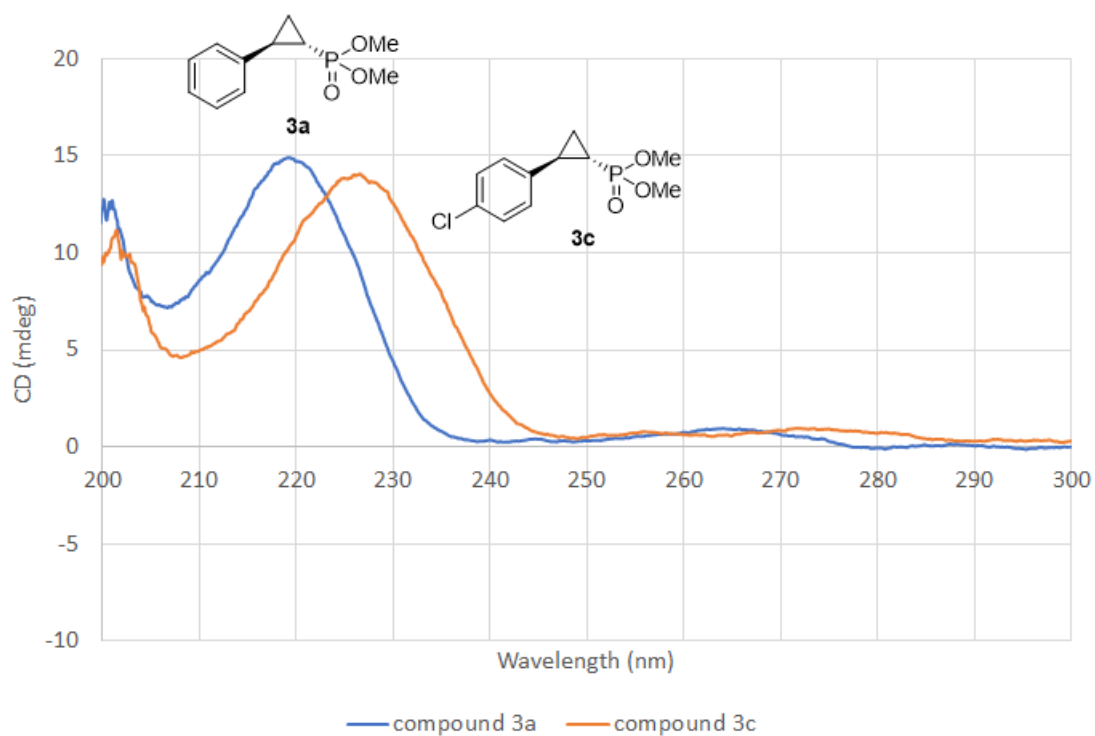

**Figure S8.** Rosetta model of (A) Mb(H64G,V68A) variant complexed with dimethyl (diazomethyl)phosphonate (**1**) and (B) Mb(H64V,V68A) variant complexed with ethyl diazoacetate (EDA). The table reports Rosetta-calculated energies of the engineered myoglobin biocatalysts complexed with the diazo substrates, the heme-bound diazo substate and the apoenzyme. (Unit: Rosetta Energy Unit (REU))

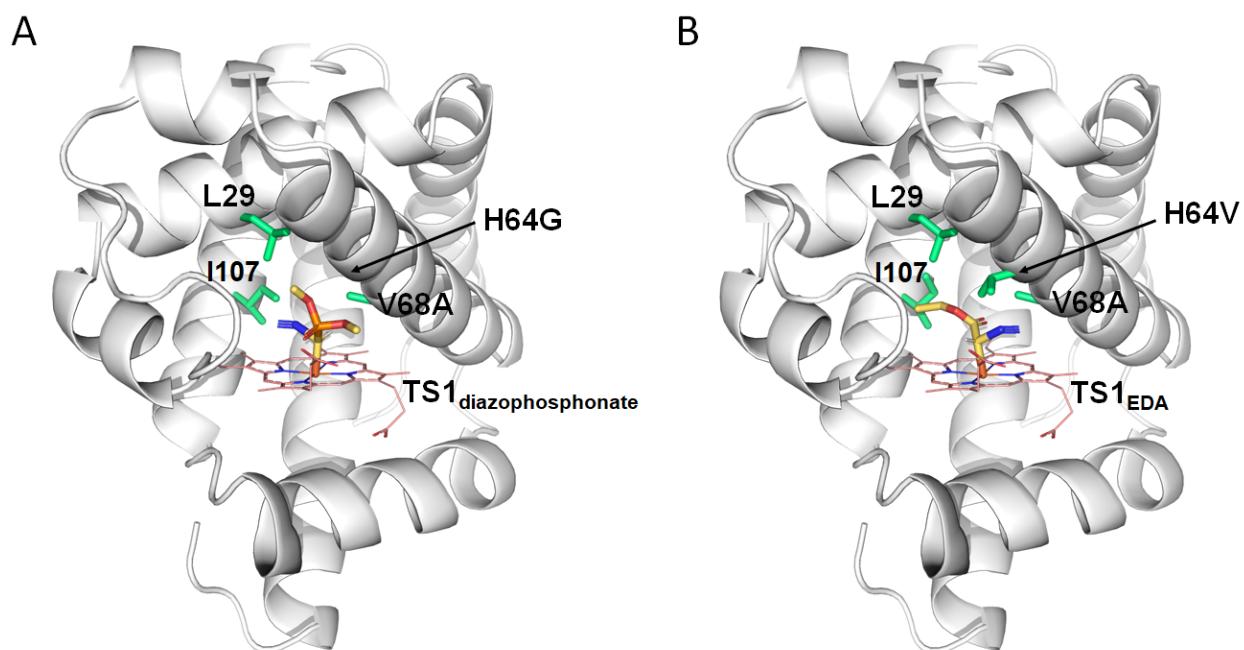

| variant       | Diazo substrate | Substrate-bound | Substrate-free | $\Delta E_{\text{binding}}$ | $E_{\text{TS1}}$ |
|---------------|-----------------|-----------------|----------------|-----------------------------|------------------|
| Mb(H64G,V68A) | phosphonate     | -461.62         | -469.02        | 7.40                        | 3.87             |
| Mb(H64V,V68A) | diazoacetate    | -468.04         | -473.85        | 5.81                        | 1.98             |



## Experimental Procedures

### General Information

All chemicals and reagents were purchased from commercial suppliers (Sigma-Aldrich, Alfa Aesar, Frontier Scientific Inc, Chem-Impex Int.) and use without any further purification, unless otherwise stated. All dry reactions were carried out under argon pressure in oven-dried glassware with magnetic stirring using standard gas-tight syringes, cannula, and septa.  $^1\text{H}$ ,  $^{19}\text{F}$ ,  $^{31}\text{P}$  and  $^{13}\text{C}$  NMR spectra were measured on a Bruker DPX-400 instrument (operating at 400MHz for  $^1\text{H}$ , 376 MHz for  $^{19}\text{F}$ , 162 MHz for  $^{31}\text{P}$  and 100 MHz for  $^{13}\text{C}$ ) or a Bruker DPX- instrument (operating at 500 MHz for  $^1\text{H}$  and 125 MHz for  $^{13}\text{C}$ ). The multiplicity signals were indicated with the common abbreviations: s (singlet), d (doublet), t (triplet), q (quartet), m (multiplet), and br (broad) and the combinations thereof. Column chromatography purification was carried out using AMD silica gel 60 230-400 mesh. Thin Layer Chromatography (TLC) was carried out using Merck Millipore TLC silica gel 60 F254 glass plates. Gas chromatography (GC) analyses were carried out using a Shimadzu GC-2010 gas chromatograph equipped with a FID detector, and a Cyclosil-B column (30 m x 0.25 mm x 0.25 $\mu\text{m}$  film). Supercritical Fluid Chromatography (SFC) analysis were carried out using a JASCO Analytical and Semi-Preparative SFC instrument equipped with a column oven (35°C), photodiode array detector.

### Protein Expression

Wild-type and engineered myoglobin variants were expressed in *E.coli* C41(DE3) cells as follows. After transformation, cells were grown in LB medium (ampicillin, 100 mg/L) at 37°C (200 rpm) until OD<sub>600</sub> reached 1 to 1.2. Cells were then induced with 0.25 mM isopropyl- $\beta$ -D-1-thiogalactopyranoside (IPTG) and 0.3 mM  $\delta$ -aminolevulinic acid (ALA). After induction, cultures were shaken at 180 rpm and 27°C and harvested after 20 hours by centrifugation at 4,000 rpm at 4°C. The cells were resuspended in 20 mL of Ni-NTA Lysis Buffer (50 mM KPi, 250 mM NaCl, 10 mM histidine, pH 8.0). Resuspended cells were frozen and stored at -80°C until purification. Cell suspensions were thawed at room temperature, lysed by sonication, and clarified by centrifugation (14,000 rpm, 50 min, 4°C). The clarified lysate was transferred to a Ni-NTA column equilibrated with Ni-NTA Lysis Buffer. The resin was washed with 50 mL of Ni-NTA Lysis Buffer and then 50 mL of Ni-NTA Wash Buffer (50 mM KPi, 250 mM NaCl, 20 mM histidine, pH 8.0). Proteins were eluted with Ni-NTA Elution Buffer (50 mM KPi, 250 mM NaCl, 250 mM histidine,

pH 7.0). After elution from the Ni-NTA column, the protein was buffer exchanged against 50 mM KPi buffer (pH 7.0) using 10 kDa Centricon filters. The concentration of the Mb variants (ferric form) was determined using  $\epsilon_{410}=156 \text{ mM}^{-1}\text{cm}^{-1}$  as the extinction coefficients.

### **Protein evolution**

The protein evolution was conducted through iterative rounds of site saturation mutagenesis. In each round, the site saturation library of Mb variants was constructed and transformed into *E. coli*. DH5 $\alpha$  cells. The colonies were collected in LB medium (ampicillin, 100 mg L<sup>-1</sup>) and plasmids were extracted by QIAprep Spin Miniprep Kit (Cat No.27104). The library coverage was assessed by DNA sequencing. The library of Mb variants were then transformed into *E. coli*. C41(DE3) cells and expressed in 96-well plates under the conditions described above. After expression, the cells were pelleted by centrifuge and resuspended in Kpi buffer (50 mM, pH=7). The reactions were initiated by adding substrate into each well of the plate in an anerobic chamber and left shaking for 5 hours. The reactions mixtures were extracted by DCM and analyzed by chiral GC-FID. The Mb variant that showed improved activity and enantioselectivity was sequenced and used as template for next round of mutagenesis and protein evolution.

### **Enzymatic cyclopropanation reactions**

General enzymatic cyclopropanation reactions were carried out at a 500  $\mu\text{L}$ -scale using Mb variant, alkenes, dimethyl (diazomethyl)phosphonate and sodium dithionite ( $\text{Na}_2\text{S}_2\text{O}_4$ ). In a typical procedure, a solution of  $\text{Na}_2\text{S}_2\text{O}_4$  in potassium phosphate buffer (50 mM, pH 7.0) was degassed by bubbling argon into the mixture for 3 min in a sealed vial. A buffered solution containing the myoglobin variant was carefully degassed in a similar manner in a separate vial. The two solutions were then mixed via cannula. Reactions were initiated by addition of alkene (from a 0.5 M stock solution in ethanol), followed by the addition of dimethyl (diazomethyl)phosphonate (from a 0.5 M stock solution in ethanol) with a syringe, and the reaction mixture was stirred for 16 hours at room temperature, under positive argon pressure. For whole cell experiments, reactions were carried out at a 500  $\mu\text{L}$ -scale using *E. coli* whole cells expressing myoglobin variant, alkene, and dimethyl (diazomethyl)phosphonate. In a typical procedure, a sealed vial containing whole cells was degassed with argon for 3 min. The reactions were initiated by addition of alkene (from a 0.5 M stock solution in ethanol), followed by the addition of dimethyl (diazomethyl)phosphonate

(from a 0.5 M stock solution in ethanol) with a syringe. The reaction mixture was stirred for 16 hours at room temperature under positive argon pressure. The TON for the whole-cell reactions were calculated based on Mb concentration in the reaction mixture as measured via UV-vis spectroscopy ( $\epsilon_{410}=156 \text{ mM}^{-1}\text{cm}^{-1}$ ) after cell lysis.

Radical spin trap experiments were carried using purified protein as the catalyst and according to the procedure described above with or without 100 mM 5,5-dimethyl-1-pyrroline-N-oxide (DMPO). The deuterium scrambling experiments were carried out using *cis*- $\beta$ -deuterio-styrene (**cis-*d*-2a**) which was prepared as described previously (Wei et al., *J. Am. Chem. Soc.* 2018, 140, 1649–1662).

### Kinetic experiments

For the kinetic measurement with Mb(H64G,V68A), reactions were carried out on a 500  $\mu\text{L}$ -scale in oxygen-free KPi buffer (pH 7.0) using 40  $\mu\text{M}$  Mb variant, 10 mM styrene (from a 0.5 M stock solution in ethanol) and 20 mM dimethyl (diazomethyl)phosphonate (from a 0.5 M stock solution in ethanol). At regular intervals 25  $\mu\text{L}$  of solution were collected and quenched with 50  $\mu\text{L}$  of 0.2 M HCl. Aliquots were analysed by adding 25  $\mu\text{L}$  of internal standard (1,3-benzodioxole, 50 mM in ethanol) followed by extraction with 500  $\mu\text{L}$  of dichloromethane and analysis by gas chromatography (GC) using calibration curves with isolated **4a**. For the kinetic measurement with Mb(L29T, H64V, V68F, V68L), reactions were carried out on a 500  $\mu\text{L}$ -scale in oxygen-free KPi buffer (pH 7.0) using Mb(L29T, H64V, V68F, V68L) expressing *E. coli*. C41(DE3) cells with cell density  $\text{OD}_{600}=100$ , 5 mM styrene (from a 0.5 M stock solution in ethanol) and 10 mM dimethyl (diazomethyl)phosphonate (from a 0.5 M stock solution in ethanol). At regular intervals 25  $\mu\text{L}$  of solution were collected and quenched with 50  $\mu\text{L}$  of 0.2 M HCl. Aliquots were analysed by adding 25  $\mu\text{L}$  of internal standard (1,3-benzodioxole, 50 mM in ethanol) followed by extraction with 500  $\mu\text{L}$  of dichloromethane and analysis by gas chromatography (GC) using calibration curves with isolated **3a**. The experiments were performed in duplicates and representative kinetic plots corresponding to these experiments are reported in Figure S2 and S3.

### Cyclopropanation reactions for preparation of racemic standards

General cyclopropanation reactions were carried out at a 500  $\mu\text{L}$ -scale using  $\text{Rh}_2(\text{OAc})_4$ , alkenes, dimethyl (diazomethyl)phosphonate in  $\text{CH}_2\text{Cl}_2$ . In a typical procedure, a solution of

$\text{Rh}_2(\text{OAc})_4$  in  $\text{CH}_2\text{Cl}_2$  was degassed by bubbling argon into the mixture for 3 min in a sealed vial. Reactions were initiated by addition of alkene (from a 0.5 M stock solution in dichloromethane), followed by the addition of dimethyl (diazomethyl)phosphonate (from a 0.5 M stock solution in dichloromethane) with a syringe, and the reaction mixture was stirred for 16 hours at room temperature, under positive argon pressure.

### Product analysis

The reactions were analyzed by adding 25  $\mu\text{L}$  of internal standard (1,3-benzodioxole, 50 mM in ethanol) to the reaction mixture, followed by extraction with 500  $\mu\text{L}$  of dichloromethane (DCM) and analyzed by GC–FID. Calibration curves of the different cyclopropane products were constructed using synthetically produced authentic standards. All measurements were performed at least in duplicate. For stereoselectivity determination, the samples were analyzed by chiral GC. Separation method for cyclopropanation reactions: 1  $\mu\text{L}$  injection, injector temp.: 140°C, detector temp: 300°C. Gradient: column temperature set at 70°C for 3 min, then to 160°C at 0.45°C/min, then to 240°C at 25 °C/min. Total run time was 206 min. Calibration curves for the different cyclopropane products were constructed using pure product. Stereoisomer resolution was performed by Supercritical Fluid Chromatography (SFC) analysis. Daicel Chiralpak IF column (0.46 cm ID  $\times$  25 cm L) was used for separation of enantiomers. All samples were eluted using isocratic solvent system with isopropanol (IPA) as modifier (see table below) in liquid  $\text{CO}_2$  at an elution rate of 4 mL/min and detected at  $\lambda=220$  nm.

| Substrate                | Method  | $t_{\text{R}}$ for <i>trans</i> enantiomer 1 (min) | $t_{\text{R}}$ for <i>trans</i> enantiomer 2 (min) |
|--------------------------|---------|----------------------------------------------------|----------------------------------------------------|
| styrene                  | 10% IPA | 3.45                                               | 3.82                                               |
| 4-fluorostyrene          | 8% IPA  | 3.63                                               | 4.05                                               |
| 4-chlorostyrene          | 8% IPA  | 5.04                                               | 5.68                                               |
| 4-bromostyrene           | 8% IPA  | 6.16                                               | 7.07                                               |
| 4-trifluoromethylstyrene | 8% IPA  | 2.74                                               | 2.98                                               |
| 4-methoxystyrene         | 10% IPA | 2.64                                               | 5.16                                               |
| 4-methylstyrene          | 10% IPA | 3.91                                               | 4.25                                               |

|                         |         |      |      |
|-------------------------|---------|------|------|
| 3-methylstyrene         | 10% IPA | 3.30 | 3.47 |
| 2-methylstyrene         | 10% IPA | 3.65 | 3.76 |
| 3-bromostyrene          | 8% IPA  | 5.50 | 6.09 |
| 2-vinyl-naphthalene     | 10% IPA | 7.16 | 8.20 |
| $\alpha$ -methylstyrene | 10% IPA | 3.05 | 3.16 |

## Computational Studies

**DFT calculations for styrene cyclopropanation reactions with dimethyl (diazomethyl)phosphonate and EDA.** DFT calculations were carried on a truncated heme-bound carbenoid species along the reaction pathway to elucidate the cyclopropanation reaction pathway of styrene with dimethyl (diazomethyl)phosphonate (**1**) and ethyl diazoacetate (EDA) using Gaussian16 (1). All reaction species were geometrically optimized at B3LYP/6-311G\*\*-SDD level of theory (2-4) and using the polarizable continuum model (PCM) (5) to simulate solvent effects. TS1, heme-bound carbenoid intermediate and TS2 were optimized from an unrestricted symmetry-broken initial guess of wavefunction to model the open-shell singlet ground state. Frequency calculations were then carried out to ensure that each reactant or intermediates is the minimum and each transition state is the first-order saddle point on the potential energy surface. Zero-point energy correction (ZPE) and thermal corrections to internal energies, enthalpies, and Gibbs free energies were also obtained. Single-point energy calculations were then conducted at B3LYP-D3BJ/def2-TZVP-SDD level of theory (6-7) to compute the high accuracy electronic energies (E). E and previously obtained corrections were added up to obtain the zero-point energy-corrected electronic energies (namely U/H/G at 0 K), internal energies (U), enthalpies (H), and Gibbs free energies (G), which are reported in **Table S8** and graphically summarized in **Figure 3c**.

**Rosetta modeling of engineered myoglobin–TS1 complexes.** To further investigate factors influencing the enzyme's cyclopropanation activity in the presence of **1** vs EDA, we modeled the transition state of the rate-determining step as determined via DFT studies —TS1— within the protein environment using the Rosetta software suite.(9) The EDA-derived TS1 (TS1<sub>EDA</sub>) was docked into the active site the myoglobin variant Mb(H64V,V68A) using the available crystal structure of this protein (PDB ID: 6M8F), whereas the dimethyl (diazomethyl)phosphonate-derived TS1 (TS1<sub>diazophosphonate</sub>) was docked into a model of Mb(H64G,V68A) generated by introducing a Val68Gly substitution into the crystal structure of Mb(H64V,V68A). Subsequent structure and energy optimizations provided the energy of each engineered biocatalyst complexed with the corresponding diazo substrate, the heme-bound diazo substate and the apoenzyme (= substrate-free enzyme). The Rosetta models and calculated energies in Rosetta Energy Unit (R.E.U.) are shown in **Figure S8**.

**Table S8.** Electronic energies (E), zero-point energy-corrected electronic energies (E+ZPE), internal energies (U), enthalpies (H), and Gibbs free energies (G) of optimized species in the cyclopropanation reaction pathway. (Unit: Hartree).

| species                         | E        | E+ZPE    | U        | H        | G        |
|---------------------------------|----------|----------|----------|----------|----------|
| heme                            | -1339.19 | -1338.85 | -1338.83 | -1338.83 | -1338.90 |
| styrene                         | -309.79  | -309.66  | -309.66  | -309.65  | -309.69  |
| N <sub>2</sub>                  | -109.57  | -109.57  | -109.57  | -109.57  | -109.59  |
| diazophosphonate                | -795.33  | -795.22  | -795.21  | -795.21  | -795.26  |
| TS1 <sub>diazophosphonate</sub> | -2134.52 | -2134.06 | -2134.03 | -2134.02 | -2134.13 |
| Int <sub>diazophosph</sub>      | -2024.97 | -2024.52 | -2024.49 | -2024.49 | -2024.59 |
| TS2 <sub>diazophosphonate</sub> | -2334.78 | -2334.19 | -2334.15 | -2334.15 | -2334.26 |
| cyclopropanep                   | -995.64  | -995.40  | -995.38  | -995.38  | -995.44  |
| diazoacetate                    | -416.14  | -416.04  | -416.03  | -416.027 | -416.07  |
| TS1 <sub>EDA</sub>              | -1755.32 | -1754.87 | -1754.84 | -1754.84 | -1754.94 |
| Int <sub>EDA</sub>              | -1645.77 | -1645.33 | -1645.30 | -1645.30 | -1645.39 |
| TS2 <sub>EDA</sub>              | -1955.58 | -1955.00 | -1954.96 | -1954.96 | -1955.07 |
| cyclopropane                    | -616.44  | -616.21  | -616.19  | -616.19  | -616.25  |

## Synthetic Procedures

### Synthesis of dimethyl (diazomethyl)phosphonate (**1**)

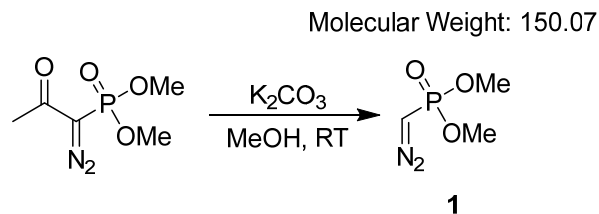

A solution of dimethyl (1-diazo-2-oxopropyl)phosphonate (1.92 g, 10 mmol) in 10 mL of MeOH was stirred with potassium carbonate (276 mg, 2 mmol) at room temperature for 15 min (monitored by TLC analysis). The precipitate was filtered off and the solvent was evaporated under reduced pressure. The crude was purified by column chromatography on silica gel (100% dichloromethane) and the product was obtained as a yellow liquid (1.26 g, 84 % yield). The analytical data are in accord with those reported in literature (S. Ohira, *Synth. Commun.* **1989**, 19, 561).

### Synthesis of cyclopropanes

Reactions were carried out at a 50 mL-scale using 40  $\mu$ M Mb(H64G,V68A), 10 mM alkene, 20 mM dimethyl (diazomethyl)phosphonate and 10 mM sodium dithionite ( $\text{Na}_2\text{S}_2\text{O}_4$ ). In a typical procedure, in a 50 mL round-bottom flask, a solution of  $\text{Na}_2\text{S}_2\text{O}_4$  in potassium phosphate buffer (50 mM, pH 7.0) was degassed by bubbling argon into the mixture for 15 min. A buffered solution containing the myoglobin variant was carefully degassed in a similar manner in a separate round-bottom flask. The two solutions were then mixed via cannula. Reactions were initiated by addition of 500  $\mu$ L of alkene (from a 0.5 M stock solution in ethanol), followed by the addition of 1 mL of dimethyl (diazomethyl)phosphonate (from a 0.5 M stock solution in ethanol) with a syringe, and the reaction mixture was stirred for 16 hours at room temperature, under positive argon pressure. The reaction was extracted with  $\text{CH}_2\text{Cl}_2$  (50 mL) and dried over  $\text{MgSO}_4$ . The solvent was evaporated under reduced pressure, and the crude was purified by flash chromatography (silica gel, from hexane/EtOAc 1:9 to EtOAc). The cyclopropanes were obtained as *trans* isomers. Due to insolubility of final products, mixture of  $\text{CD}_3\text{OD}$  and  $\text{CDCl}_3$  (1:1) was used for NMR analysis.



### Dimethyl 2-phenylcyclopropyl phosphonate (**3a**)

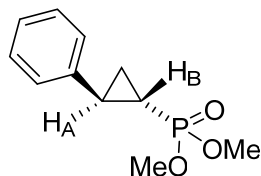

Following the general procedure using styrene, *trans* isomer of **3a** was isolated as yellowish oil (106 mg, 94% isolated yield).

**GC/MS** *m/z* (% relative intensity): 226(40.5), 124(8.2), 118(9.9), 117(100), 116(34.4), 115(75.4), 109(7.0), 94(7.7), 91(15.5), 89(5.8), 79(9.3), 65(5.7), 63(5.2). **<sup>1</sup>H NMR** (CDCl<sub>3</sub>/CD<sub>3</sub>OD, 500 MHz): δ 7.38 (t, *J*=7.5 Hz, 2H), 7.30 (t, *J*=7.4 Hz, 1H), 7.25 (d, *J*=7.3 Hz, 1H), 3.90 (d, *J*<sub>H-P</sub>=10.7 Hz, 3H), 3.88 (d, *J*<sub>H-P</sub>=10.4 Hz, 3H), 2.54 (ddt, <sup>3</sup>*J*<sub>H-P cis</sub>=14.6, *J*<sub>H-H</sub>=8.8, 5.7 Hz, 1H, H<sub>A</sub>), 1.52 (dddd, <sup>2</sup>*J*<sub>H-P</sub>=19.4, *J*<sub>H-H</sub>=8.8, 6.4, 4.8 Hz, 1H, H<sub>B</sub>), 1.48-1.41 (m, 1H), 1.33 ppm (m, 1H). **<sup>31</sup>P NMR** (CDCl<sub>3</sub>/CD<sub>3</sub>OD, 162 MHz): δ 29.84 ppm (s). **<sup>13</sup>C NMR** (CDCl<sub>3</sub>/CD<sub>3</sub>OD, 126 MHz): δ 129.4, 127.5, 126.9, 21.8, 14.6, 12.9 ppm (d, *J*<sub>C-P</sub>=29.0 Hz). The carbon signals for the methoxy groups overlap with the CD<sub>3</sub>OD solvent peak.

### Dimethyl 2-(4-fluoro)phenylcyclopropyl phosphonate (**3b**)

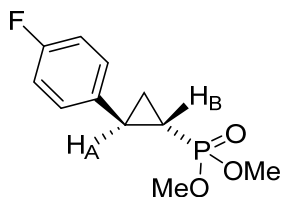

Following the general procedure using 4-fluoro styrene, *trans* isomer **3b** was isolated as yellowish oil (110 mg, 90% isolated yield).

**GC/MS** *m/z* (% relative intensity): 244(35.4), 136(10.3), 135(100), 134(17.4), 133(50.0), 124(6.5), 115(19.1), 109(18.6), 94(6.8), 83(5.0), 79(7.9). **<sup>1</sup>H NMR** (CDCl<sub>3</sub>/CD<sub>3</sub>OD, 500 MHz): δ 7.26 (dd, *J*=8.1 Hz, *J*<sub>H-F</sub>=5.5 Hz, 2H), 7.10 (t, *J*=8.6 Hz, 2H), 3.90 (d, *J*<sub>H-P</sub>=8.3 Hz, 3H), 3.88 (d, *J*<sub>H-P</sub>=8.3 Hz, 3H), 2.54 (ddt, <sup>3</sup>*J*<sub>H-P cis</sub>=11.4 Hz, *J*=9.2, 5.7 Hz, 1H, H<sub>A</sub>), 1.54 (dddd, <sup>2</sup>*J*<sub>H-P</sub>=11.4 Hz, *J*=8.9, 6.2, 5.6 Hz, 1H, H<sub>B</sub>), 1.47-1.39 (m, 1H), 1.30 ppm (m, 1H). **<sup>19</sup>F NMR** (CDCl<sub>3</sub>/CD<sub>3</sub>OD, 376 MHz): δ -112.67 (ddd, *J*=13.8, 8.6, 5.2 Hz). **<sup>31</sup>P NMR** (CDCl<sub>3</sub>/CD<sub>3</sub>OD, 162 MHz): δ 29.62 ppm (s). **<sup>13</sup>C NMR** (CDCl<sub>3</sub>/CD<sub>3</sub>OD, 126 MHz): δ 163.4, 135.9, 128.5 (d, *J*<sub>C-F</sub>=8.0 Hz), 115.8 (d, *J*<sub>C-F</sub>=21.7 Hz), 20.9, 14.3, 12.5 (d, *J*=5.5 Hz). The carbon signals for the methoxy groups overlap with the CD<sub>3</sub>OD solvent peak.

### Dimethyl 2-(4-chloro)phenylcyclopropyl phosphonate (3c)

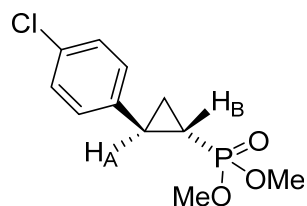

Following the general procedure using 4-chloro, *trans* isomer **3c** was isolated as yellowish oil (77 mg, 59% isolated yield).

**GC/MS**  $m/z$  (% relative intensity): 262(17.6), 261(7.5), 260(51.7), 165(5.0), 153(30.3), 152(12.6), 151(100), 150(10.4), 149(22.9), 129(8.4), 125(5.0), 124(11.3), 117(5.5), 116(47.4), 115(75.2), 114(5.3), 109(11.3), 94(9.5), 93(5.5), 89(8.8), 79(11.7), 63(6.4).  **$^1\text{H}$  NMR** ( $\text{CDCl}_3/\text{CD}_3\text{OD}$ , 500 MHz):  $\delta$  7.37 (d,  $J=8.5$  Hz, 2H), 7.20 (d,  $J=8.4$  Hz, 2H), 3.90 (d,  $J_{\text{H-P}}=9.4$  Hz, 3H), 3.88 (d,  $J_{\text{H-P}}=9.5$  Hz, 3H), 2.54 (ddt,  $^3J_{\text{H-P cis}}=14.6$  Hz,  $J_{\text{H-H}}=8.9, 5.7$  Hz, 1H,  $\text{H}_A$ ), 1.58 (dddd,  $^2J_{\text{H-P}}=18.9$ ,  $J_{\text{H-H}}=8.8, 6.4, 4.9$  Hz, 1H,  $\text{H}_B$ ), 1.48-1.39 (m, 1H), 1.31-1.24 ppm (m, 1H).  **$^{31}\text{P}$  NMR** ( $\text{CDCl}_3/\text{CD}_3\text{OD}$ , 162 MHz):  $\delta$  29.35 ppm (s).  **$^{13}\text{C}$  NMR** ( $\text{CDCl}_3/\text{CD}_3\text{OD}$ , 126 MHz):  $\delta$  138.7, 133.1, 129.3, 128.2, 21.1, 14.7, 12.9 ppm (d,  $J=5.6$  Hz). The carbon signals for the methoxy groups overlap with the  $\text{CD}_3\text{OD}$  solvent peak.

### Dimethyl 2-(4-bromo)phenylcyclopropyl phosphonate (3d)

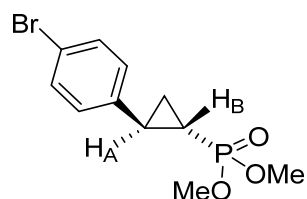

Following the general procedure using 4-bromo styrene (reaction volume 600 mL), *trans* isomer **3d** was isolated as yellowish oil (1.1 g, 61% isolated yield).

**GC/MS**  $m/z$  (% relative intensity): 306(25.7), 304(27.0), 197(15.5), 195(22.3), 193(8.8), 130(6.2), 129(5.8), 124(7.7), 117(10.8), 116(100), 115(54.4), 114(5.4), 109(8.1), 94(6.8), 89(7.2), 79(8.4), 63(5.6).  **$^1\text{H}$  NMR** ( $\text{CDCl}_3/\text{CD}_3\text{OD}$ , 500 MHz):  $\delta$  7.52 (d,  $J=8.4$  Hz, 2H), 7.14 (d,  $J=8.4$  Hz, 2H), 3.90 (d,  $J_{\text{H-P}}=10.7$  Hz, 3H), 3.88 (d,  $J_{\text{H-P}}=10.0$  Hz, 3H), 2.52 (ddt,  $^3J_{\text{H-P cis}}=14.6$ ,  $J_{\text{H-H}}=8.8, 5.7, 5.7$  Hz, 1H,  $\text{H}_A$ ), 1.60 (dddd,  $^2J_{\text{H-P}}=19.4$ ,  $J_{\text{H-H}}=8.8, 6.4, 4.8$  Hz, 1H,  $\text{H}_B$ ), 1.47-1.40 (m, 1H), 1.27 ppm (m, 1H).  **$^{31}\text{P}$  NMR** ( $\text{CDCl}_3/\text{CD}_3\text{OD}$ , 162 MHz):  $\delta$  29.27 ppm (s).  **$^{13}\text{C}$  NMR** ( $\text{CDCl}_3/\text{CD}_3\text{OD}$ , 126 MHz):  $\delta$  138.7, 133.1, 129.3, 128.2, 21.1, 14.7, 12.9 ppm (d,  $J=5.6$  Hz).

MHz):  $\delta$  141.2, 139.3, 132.2, 128.6, 21.1, 14.6, 12.7 ppm (d,  $J=5.6$  Hz). The carbon signals for the methoxy groups overlap with the CD<sub>3</sub>OD solvent peak.

**Dimethyl ((1*S*,2*R*)-2-(4'-methoxy-[1,1'-biphenyl]-4-yl)cyclopropyl)phosphonate (3da)**

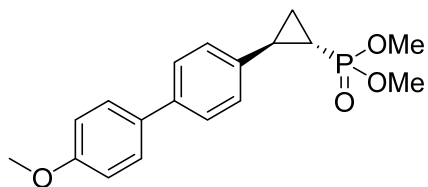

A 50 mL-flask was charged with Pd(PPh<sub>3</sub>)<sub>4</sub> (0.03 mmol), toluene (10 mL), dimethyl 2-(4-bromo)phenylcyclopropyl phosphonate (**3d**, 1 mmol), and an aqueous solution of Na<sub>2</sub>CO<sub>3</sub> (5 mL of a 2M solution) under argon atmosphere, and then (4-methoxyphenyl)boronic acid (1.1 mmol) in ethanol (2.5 mL) was added. The mixture was refluxed overnight. After the reaction was complete, the residual (4-methoxyphenyl)boronic acid was oxidized by 30% H<sub>2</sub>O<sub>2</sub> (0.5 mL) at room temperature for 1h. The product was extracted with ether, washed by a saturated NaCl solution, and finally dried over Na<sub>2</sub>SO<sub>4</sub>. The solvent was evaporated under reduced pressure, and the crude was purified by flash chromatography (silica gel, from hexane/EtOAc 1:9 to EtOAc). Compound **3da** was isolated as white solid (66% isolated yield).

**GC/MS**  $m/z$  (% relative intensity): 333(19.5), 332(100), 224(16.5), 223(92.1), 222(39.7), 221(28.8), 209(10.1), 208(52.9), 201(21.6), 206(7.6), 195(26.7), 193(7.8), 192(10.8), 191(19.1), 190(9.0), 189(9.9), 180(6.6), 179(17.6), 166(7.3), 165(24.7), 153(8.0), 152(17.3), 139(6.7), 115(16.8), 109(13.7), 79(10.8). **<sup>1</sup>H NMR** (CDCl<sub>3</sub>, 400 MHz):  $\delta$  7.49 (d,  $J=8.0$  Hz, 2H), 7.47 (d,  $J=8.0$  Hz, 2H), 7.16 (d,  $J=8.0$  Hz, 2H), 6.97 (d,  $J=8.0$  Hz, 2H), 3.85 (s, 3H), 3.80 (d,  $J=6.8$  Hz, 3H), 3.77 (d,  $J=6.8$  Hz, 3H), 2.60-2.45 (m, 1H), 1.80-1.64 ppm (m, 2H). **<sup>31</sup>P NMR** (CDCl<sub>3</sub>, 162 MHz):  $\delta$  34.31 ppm (s). **<sup>13</sup>C NMR** (CDCl<sub>3</sub>, 101 MHz):  $\delta$  159.1, 139.1, 137.9, 134.0, 128.8, 126.9, 126.5, 114.2, 56.2, 53.0, 31.7, 21.9, 15.9, 12.9 ppm (d,  $J=4.0$  Hz). The carbon signals for the methoxy groups overlap with the CD<sub>3</sub>OD solvent peak. Quaternary carbons were not detected.

### Dimethyl 2-(4-trifluoromethyl)phenylcyclopropyl phosphonate (**3e**)

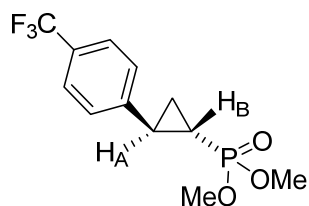

Following the general procedure using 4-trifluoromethyl styrene, *trans* isomer **3e** was isolated as yellowish oil (76 mg, 52% isolated yield).

**GC/MS** *m/z* (% relative intensity): 295(13.4), 294(100), 293(6.7), 275(15.1), 230(5.1), 199(5.8), 186(8.7), 185(75.9), 184(15.1), 183(25.1), 166(15.5), 165(50.6), 164(33.6), 159(5.8), 145(10.6), 133(10.8), 129(11.0), 124(29.9), 120(5.5), 116(23.7), 115(46.0), 110(11.4), 109(49.2), 95(5.4), 94(20.5), 93(11.4), 80(6.1), 79(25.0), 63(5.6). **<sup>1</sup>H NMR** (CDCl<sub>3</sub>/CD<sub>3</sub>OD, 500 MHz): δ 7.26 (dd, *J*=8.1 Hz, *J*<sub>H-F</sub>=5.5 Hz, 2H), 7.10 (t, *J*=8.6 Hz, 2H), 3.90 (d, *J*<sub>H-P</sub>=8.3 Hz, 3H), 3.88 (d, *J*<sub>H-P</sub>=8.3 Hz, 3H), 2.54 (ddt, <sup>3</sup>*J*<sub>H-P cis</sub>=11.4 Hz, *J*=9.2, 5.7 Hz, 1H, H<sub>A</sub>), 1.54 (dddd, <sup>2</sup>*J*<sub>H-P</sub>=11.4 Hz, *J*=8.9, 6.2, 5.6 Hz, 1H, H<sub>B</sub>), 1.47-1.39 (m, 1H), 1.30 ppm (m, 1H). **<sup>19</sup>F NMR** (CDCl<sub>3</sub>/CD<sub>3</sub>OD, 376 MHz): δ -112.67 ppm (ddd, *J*=13.8, 8.6, 5.2 Hz). **<sup>31</sup>P NMR** (CDCl<sub>3</sub>/CD<sub>3</sub>OD, 162 MHz): δ 29.62 ppm (s). **<sup>13</sup>C NMR** (CDCl<sub>3</sub>/CD<sub>3</sub>OD, 126 MHz): δ 163.4, 135.9, 128.5 (d, *J*<sub>C-F</sub>=8.0 Hz), 115.8 (d, *J*<sub>C-F</sub>=21.7 Hz), 20.9, 14.3, 12.5 ppm (d, *J*=5.5 Hz). The carbon signals for the methoxy groups overlap with the CD<sub>3</sub>OD solvent peak.

### Dimethyl 2-(4-methoxy)phenylcyclopropyl phosphonate (**3f**)

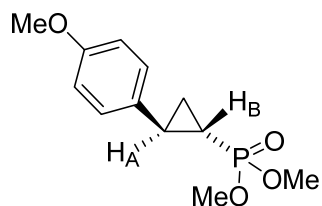

Following the general procedure using 4-methoxy styrene, *trans* isomer **3f** was isolated as yellowish oil (111 mg, 87% isolated yield).

**GC/MS** *m/z* (% relative intensity): 256(23.0), 148(11.2), 147(100), 146(21.4), 145(16.3), 132(6.4), 131(12.9), 117(5.7), 115(12.4), 103(7.7), 91(15.0), 77(6.4). **<sup>1</sup>H NMR** (CDCl<sub>3</sub>/CD<sub>3</sub>OD, 500 MHz): δ 7.02 (d, *J*=8.6 Hz, 2H), 6.79 (d, *J*=8.7 Hz, 2H), 3.74 (d, *J*<sub>H-P</sub>=6.7 Hz, 3H), 3.73 (s, 3H), 3.72 (d, *J*<sub>H-P</sub>=7.0 Hz, 3H), 2.36 (ddt, <sup>3</sup>*J*<sub>H-P cis</sub>=14.6, *J*<sub>H-H</sub>=8.9, 5.7 Hz, 1H), 1.40-1.31 (m, 2H), 1.09-1.02 ppm (m, 1H). **<sup>31</sup>P NMR** (CDCl<sub>3</sub>/CD<sub>3</sub>OD, 162 MHz): δ 30.16 ppm (s). **<sup>13</sup>C NMR**

(CDCl<sub>3</sub>/CD<sub>3</sub>OD, 126 MHz):  $\delta$  127.9, 114.6, 21.0, 14.0, 12.4 ppm (d,  $J=5.2$  Hz). The carbon signals for the methoxy groups overlap with the CD<sub>3</sub>OD solvent peak. Quaternary carbons were not detected.

### Dimethyl 2-(4-methyl)phenylcyclopropyl phosphonate (**3g**)

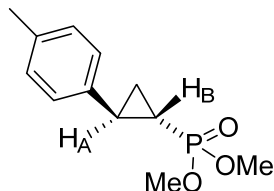

Following the general procedure using 4-methyl styrene, *trans* isomer **3g** was isolated as yellowish oil (49 mg, 41% isolated yield).

**GC/MS**  $m/z$  (% relative intensity): 240(28.6), 132(11.0), 131(100), 130(20.2), 129(33.4), 128(13.1), 127(5.1), 116(14.3), 115(20.6), 91(18.0), 79(5.4), 77(5.0). **<sup>1</sup>H NMR** (CDCl<sub>3</sub>/CD<sub>3</sub>OD, 500 MHz):  $\delta$  7.05 (d,  $J=8.0$  Hz, 2H), 6.97 (d,  $J=8.1$  Hz, 2H), 3.74 (d,  $J_{H-P}=9.2$  Hz, 3H), 3.72 (d,  $J_{H-P}=9.2$  Hz, 3H), 2.36 (ddt,  $^3J_{H-P \text{ cis}}=11.6$ ,  $J=9.0$ , 5.7 Hz, 1H, H<sub>A</sub>), 2.26 (s, 3H), 1.37 (dddd,  $^2J_{H-P}=19.0$ ,  $J=8.9$ , 6.4, 4.8 Hz, 1H, H<sub>B</sub>), 1.30-1.24 (m, 1H), 1.13-1.06 ppm (m, 1H). **<sup>31</sup>P NMR** (CDCl<sub>3</sub>/CD<sub>3</sub>OD, 162 MHz):  $\delta$  30.08 ppm (s). **<sup>13</sup>C NMR** (CDCl<sub>3</sub>/CD<sub>3</sub>OD, 126 MHz):  $\delta$  137.0, 136.9, 129.8, 126.6, 21.3 (d,  $J=3.8$  Hz), 21.0, 14.2, 12.5 ppm (d,  $J_{C-P}=5.9$  Hz). The carbon signals for the methoxy groups overlap with the CD<sub>3</sub>OD solvent peak.

### Dimethyl 2-(3-methyl)phenylcyclopropyl phosphonate (**3h**)

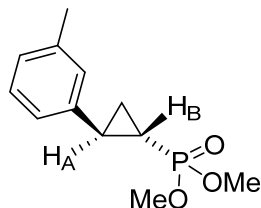

Following the general procedure using 3-methyl styrene, *trans* isomer **3h** was isolated as yellowish oil (102 mg, 85% isolated yield).

**GC/MS**  $m/z$  (% relative intensity): 241(5.1), 240(37.5), 132(10.9), 131(100), 130(37.2), 129(41.9), 128(16.0), 127(6.2), 124(6.1), 116(17.7), 115(26.1), 94(6.4), 91(19.8), 79(7.3), 77(5.8). **<sup>1</sup>H NMR** (CDCl<sub>3</sub>/CD<sub>3</sub>OD, 500 MHz):  $\delta$  7.12-7.05 (m, 3H), 6.96-6.93 (m, 1H), 3.77 (d,  $J_{H-P}=10.8$  Hz, 3H), 3.74 (d,  $J_{H-P}=10.8$  Hz, 3H), 2.45-2.39 (m, 1H), 2.38 (s, 3H), 1.44-1.35 (m, 1H), 1.28-1.23

(m, 1H), 1.09 ppm (m, 1H).  $^{31}\text{P}$  NMR ( $\text{CDCl}_3/\text{CD}_3\text{OD}$ , 162 MHz):  $\delta$  35.17 ppm (s).  $^{13}\text{C}$  NMR ( $\text{CDCl}_3/\text{CD}_3\text{OD}$ , 126 MHz):  $\delta$  138.5, 130.5, 127.5, 126.6, 126.2, 20.0 (d,  $J=4.0$  Hz), 19.7, 12.8, 11.2 ppm (d,  $J=4.7$  Hz). The carbon signals for the methoxy groups overlap with the  $\text{CD}_3\text{OD}$  solvent peak.

### Dimethyl 2-(2-methyl)phenylcyclopropyl phosphonate (**3i**)

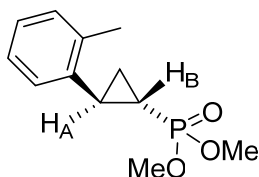

Following the general procedure using 2-methyl styrene, *trans* isomer **3i** was isolated as yellowish oil (61 mg, 51% isolated yield).

**GC/MS**  $m/z$  (% relative intensity): 241(5.7), 240(41.6), 225(12.0), 132(6.6), 131(65.2), 130(100), 129(70.0), 128(28.3), 127(10.7), 124(28.1), 116(23.7), 115(43.5), 111(18.6), 110(8.9), 109(5.2), 94(22.1), 91(24.3), 79(12.8), 77(9.1).  $^1\text{H}$  NMR ( $\text{CDCl}_3/\text{CD}_3\text{OD}$ , 500 MHz):  $\delta$  7.14-7.03 (m, 1H), 6.99-6.91 (m, 1H), 3.76 (d,  $J=10.8$  Hz, 3H), 3.75 (d,  $J=10.8$  Hz, 3H), 2.46-2.39 (m, 1H), 2.38 (s, 3H), 1.45-1.34 (m, 1H), 1.31-1.23 (m, 1H), 1.09 ppm (m, 1H).  $^{31}\text{P}$  NMR ( $\text{CDCl}_3/\text{CD}_3\text{OD}$ , 162 MHz):  $\delta$  35.17 ppm (s).  $^{13}\text{C}$  NMR ( $\text{CDCl}_3/\text{CD}_3\text{OD}$ , 126 MHz):  $\delta$  138.5, 130.5, 127.5, 126.6, 126.2, 20.0 (d,  $J=4.0$  Hz), 19.7, 12.8, 11.2 ppm (d,  $J=4.7$  Hz). The carbon signals for the methoxy groups overlap with the  $\text{CD}_3\text{OD}$  solvent peak.

### Dimethyl 2-(3-bromo)phenylcyclopropyl phosphonate (**3j**)

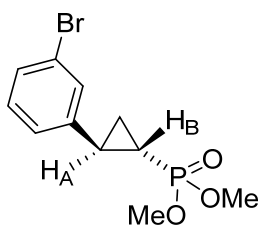

Following the general procedure using 3-bromo styrene, *trans* isomer **3j** was isolated as yellowish oil (54 mg, 36% isolated yield).

**GC/MS**  $m/z$  (% relative intensity): 306(15.6), 304(14.0), 225(6.3), 197(5.0), 195(10.2), 194(6.6), 130(6.0), 129(9.7), 124(11.6), 117(11.9), 116(100), 115(92.5), 114(6.7), 111(5.1), 109(24.4), 94(11.7), 93(9.4), 89(13.8), 79(17.6), 77(5.0), 63(12.4).  $^1\text{H}$  NMR ( $\text{CDCl}_3/\text{CD}_3\text{OD}$ , 500 MHz):  $\delta$

7.46 (d,  $J=8.0$  Hz, 1H), 7.38 (s, 1H), 7.29 (t,  $J=7.8$  Hz, 1H), 7.19 (d,  $J=7.7$  Hz, 1H), 3.91 (d,  $J_{\text{H-P}}=6.9$  Hz, 3H), 3.88 (d,  $J_{\text{H-P}}=6.9$  Hz, 2H), 2.53 (ddt,  $^3J_{\text{H-P cis}}=14.5$ ,  $J=8.9$ , 5.7 Hz, 1H,  $H_{\text{A}}$ ), 1.59 (dddd,  $^2J_{\text{H-P}}=19.0$ ,  $J=8.9$ , 6.4, 5.0 Hz, 1H,  $H_{\text{B}}$ ), 1.50-1.40 (m, 1H), 1.34-1.26 ppm (m, 1H).  $^{31}\text{P}$  NMR ( $\text{CDCl}_3/\text{CD}_3\text{OD}$ , 162 MHz):  $\delta$  35.17 ppm (s).  $^{13}\text{C}$  NMR ( $\text{CDCl}_3/\text{CD}_3\text{OD}$ , 126 MHz):  $\delta$  130.4, 130.1, 129.4, 125.2, 122.8, 20.8, 13.7, 12.5 ppm. The carbon signals for the methoxy groups overlap with the  $\text{CD}_3\text{OD}$  solvent peak.

### Dimethyl 2-naphthylcyclopropyl phosphonate (**3k**)

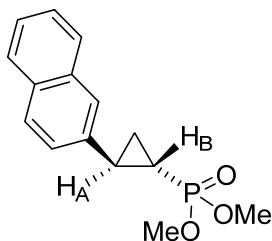

Following the general procedure using naphthyl vinyl, *trans* isomer **3k** was isolated as yellowish oil (57 mg, 41% isolated yield).

**GC/MS**  $m/z$  (% relative intensity): 276(34.6), 207(21.2), 168(14.2), 167(100), 166(64.6), 165(60.5), 164(5.8), 152(20.3), 139(5.5), 115(5.6), 73(6.9).  $^1\text{H}$  NMR ( $\text{CDCl}_3/\text{CD}_3\text{OD}$ , 500 MHz):  $\delta$  7.95-7.85 (m, 3H), 7.61 (s, 1H), 7.56 (m, 2H), 7.33 (dd,  $J=8.6$ , 1.6 Hz, 1H), 3.93 (d,  $J_{\text{H-P}}=8.3$  Hz, 3H), 3.90 (d,  $J_{\text{H-P}}=8.3$  Hz, 3H), 2.74 (ddt,  $^3J_{\text{H-P cis}}=14.6$ ,  $J=8.7$ , 5.6 Hz, 1H,  $H_{\text{A}}$ ), 1.65 (dddd,  $^2J_{\text{H-P}}=20.0$ ,  $J=9.1$ , 6.7, 4.6 Hz, 1H,  $H_{\text{B}}$ ), 1.61-1.53 (m, 1H), 1.43-1.37 ppm (m, 1H).  $^{31}\text{P}$  NMR ( $\text{CDCl}_3/\text{CD}_3\text{OD}$ , 162 MHz):  $\delta$  33.82 ppm (s).  $^{13}\text{C}$  NMR ( $\text{CDCl}_3/\text{CD}_3\text{OD}$ , 126 MHz):  $\delta$  137.0, 133.7, 132.7, 126.6, 125.9, 124.4, 21.5, 12.8, 12.5 ppm (d,  $J=4.9$  Hz). The carbon signals for the methoxy groups overlap with the  $\text{CD}_3\text{OD}$  solvent peak.

### Dimethyl 2-methyl-2-phenylcyclopropyl phosphonate (**3l**)

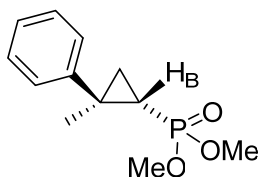

Following the general procedure using  $\alpha$ -methyl styrene, *trans* isomer **3l** was isolated as yellowish oil (18 mg, 15% isolated yield).

**GC/MS** *m/z* (% relative intensity): 240(5.6), 137(48.6), 131(57.6), 130(100), 129(56), 128(22.5), 116(15.3), 115(37.0), 111(5.3), 110(21.9), 109(5.8), 105(16.9), 103(10.3), 102(7.9), 93(7.7), 91(32.3), 80(6.3), 79(20.8), 78(10.0), 77(18.0), 65(7.2), 63(6.7), 53(5.3), 51(11.7). **<sup>1</sup>H NMR** (CDCl<sub>3</sub>/CD<sub>3</sub>OD, 400 MHz): δ 7.44-7.39 (m, 4H), 7.36-7.30 (m, 1H), 3.93 (d, *J*<sub>H-P</sub>=11.1 Hz, 3H), 3.90 (d, *J*<sub>H-P</sub>=10.9 Hz, 3H), 1.73 (s, 3H), 1.64 (td, *J*=9.9, 4.5 Hz, 1H), 1.47 (ddd, <sup>2</sup>*J*<sub>H-P</sub>=18.8, *J*=6.5, 4.6 Hz, 1H, H<sub>B</sub>), 1.28 ppm (ddd, *J*=9.5, 6.6, 2.6 Hz, 1H). **<sup>31</sup>P NMR** (CDCl<sub>3</sub>/CD<sub>3</sub>OD, 162 MHz): δ 29.06 ppm (s). **<sup>13</sup>C NMR** (CDCl<sub>3</sub>/CD<sub>3</sub>OD, 126 MHz): δ 128.3, 126.4, 125.8, 13.5, 12.0, 11.8 ppm (d, *J*=5.5 Hz). The carbon signals for the methoxy groups overlap with the CD<sub>3</sub>OD solvent peak.



## X-ray crystallographic analyses

X-ray crystal diffraction data were collected using a XtaLab Synergy-S Dualflex diffractometer equipped with a HyPix-6000HE HPC area detector for data collection at 100.00(10) K. A preliminary set of cell constants and an orientation matrix were calculated from reflections harvested from a sampling of reciprocal space (*CrysAlisPro*, version 171.40.71a; Rigaku Corporation: Oxford, UK, 2020.). The full data collection was carried out using a PhotonJet (Cu) X-ray Source with frame times of 0.07 and 0.26 seconds and a detector distance of 31.2 mm. Series of frames were collected in 0.50° steps in  $\omega$  at different  $2\theta$ ,  $\kappa$ , and  $\phi$  settings. The intensity data were scaled and corrected for absorption, and final cell constants were calculated from the xyz centroids of strong reflections from the actual data collections after integration. Space groups were determined based on systematic absences and intensity statistics.

Structures were solved using SHELXT (Sheldrick, G. M. *SHELXT*, version 2018/2; *Acta Crystallogr.* 2015, A71, 3-8.) and refined using SHELXL (against  $F^2$ ) (Sheldrick, G. M. *SHELXL*, version 2018/3; *Acta Crystallogr.* 2015, C71, 3-8.). All non-hydrogen atoms were refined with anisotropic displacement parameters. All hydrogen atoms were placed in ideal positions and refined as riding atoms with relative isotropic displacement parameters. See **Figure S5** and **Table S9** for additional crystal data and structure refinement information for **3da**.

**Table S9.** Crystal data and structure refinement for dimethyl ((*1S,2R*)-2-(4'-methoxy-[1,1'-biphenyl]-4-yl)cyclopropyl)phosphonate (**3da**). Cambridge Crystallographic Data Centre (CCDC) entry: 2105528.

|                                                     |                                                           |                     |
|-----------------------------------------------------|-----------------------------------------------------------|---------------------|
| Identification code                                 | <b>3da</b>                                                |                     |
| Empirical formula                                   | C <sub>18</sub> H <sub>27</sub> O <sub>7</sub> P          |                     |
| Formula weight                                      | 386.36                                                    |                     |
| Temperature                                         | 100.00(10) K                                              |                     |
| Wavelength                                          | 1.54184 Å                                                 |                     |
| Crystal system                                      | orthorhombic                                              |                     |
| Space group                                         | <i>P</i> 2 <sub>1</sub> 2 <sub>1</sub> 2 <sub>1</sub>     |                     |
| Unit cell dimensions                                | <i>a</i> = 6.38640(10) Å                                  | $\alpha = 90^\circ$ |
|                                                     | <i>b</i> = 7.84160(10) Å                                  | $\beta = 90^\circ$  |
|                                                     | <i>c</i> = 39.8125(7) Å                                   | $\gamma = 90^\circ$ |
| Volume                                              | 1993.79(5) Å <sup>3</sup>                                 |                     |
| <i>Z</i>                                            | 4                                                         |                     |
| Density (calculated)                                | 1.287 Mg/m <sup>3</sup>                                   |                     |
| Absorption coefficient                              | 1.534 mm <sup>-1</sup>                                    |                     |
| <i>F</i> (000)                                      | 824                                                       |                     |
| Crystal color, morphology                           | colourless, plate                                         |                     |
| Crystal size                                        | 0.153 x 0.122 x 0.015 mm <sup>3</sup>                     |                     |
| Theta range for data collection                     | 2.219 to 77.896°                                          |                     |
| Index ranges                                        | -7 ≤ <i>h</i> ≤ 8, -7 ≤ <i>k</i> ≤ 9, -50 ≤ <i>l</i> ≤ 50 |                     |
| Reflections collected                               | 24420                                                     |                     |
| Independent reflections                             | 4187 [ <i>R</i> (int) = 0.0536]                           |                     |
| Observed reflections                                | 3950                                                      |                     |
| Completeness to theta = 74.504°                     | 100.0%                                                    |                     |
| Absorption correction                               | Multi-scan                                                |                     |
| Max. and min. transmission                          | 1.00000 and 0.66158                                       |                     |
| Refinement method                                   | Full-matrix least-squares on <i>F</i> <sup>2</sup>        |                     |
| Data / restraints / parameters                      | 4187 / 0 / 238                                            |                     |
| Goodness-of-fit on <i>F</i> <sup>2</sup>            | 1.098                                                     |                     |
| Final <i>R</i> indices [ <i>I</i> > 2σ( <i>I</i> )] | <i>R</i> 1 = 0.0432, <i>wR</i> 2 = 0.1090                 |                     |
| <i>R</i> indices (all data)                         | <i>R</i> 1 = 0.0459, <i>wR</i> 2 = 0.1105                 |                     |
| Absolute structure parameter                        | 0.013(12)                                                 |                     |
| Largest diff. peak and hole                         | 0.425 and -0.386 e.Å <sup>-3</sup>                        |                     |

## NMR Spectra

### Dimethyl 2-phenylcyclopropyl phosphonate (3a)

$^1\text{H}$  NMR ( $\text{CDCl}_3/\text{CD}_3\text{OD}$ , 500 MHz):

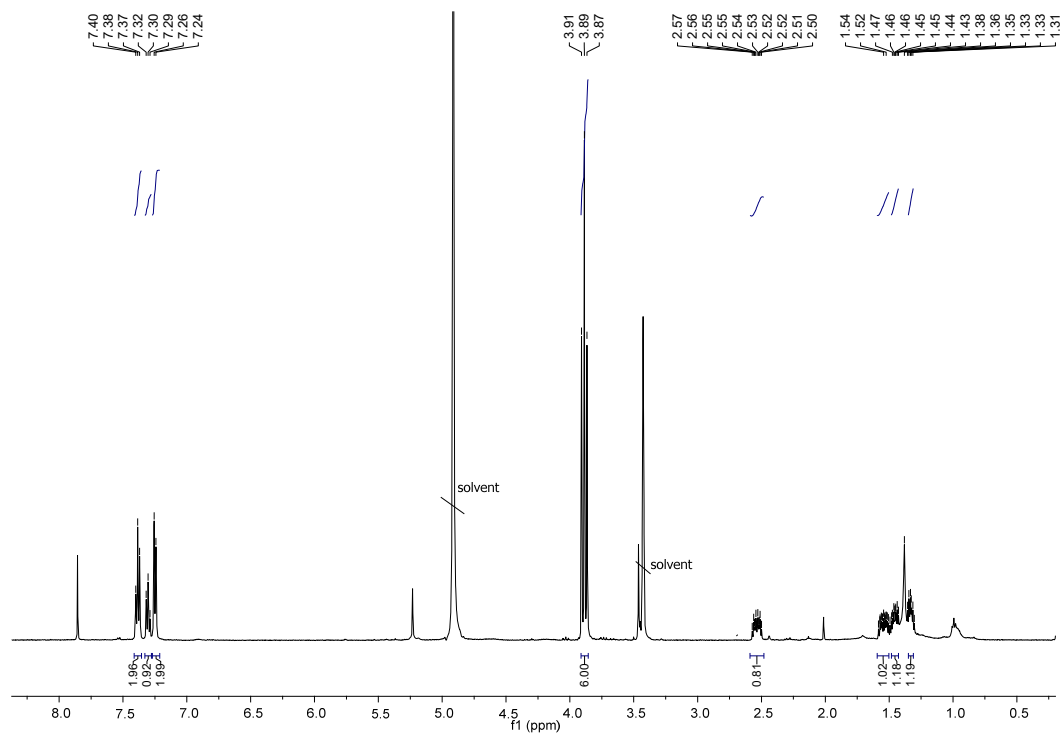

$^{31}\text{P}$  NMR ( $\text{CDCl}_3/\text{CD}_3\text{OD}$ , 162 MHz):

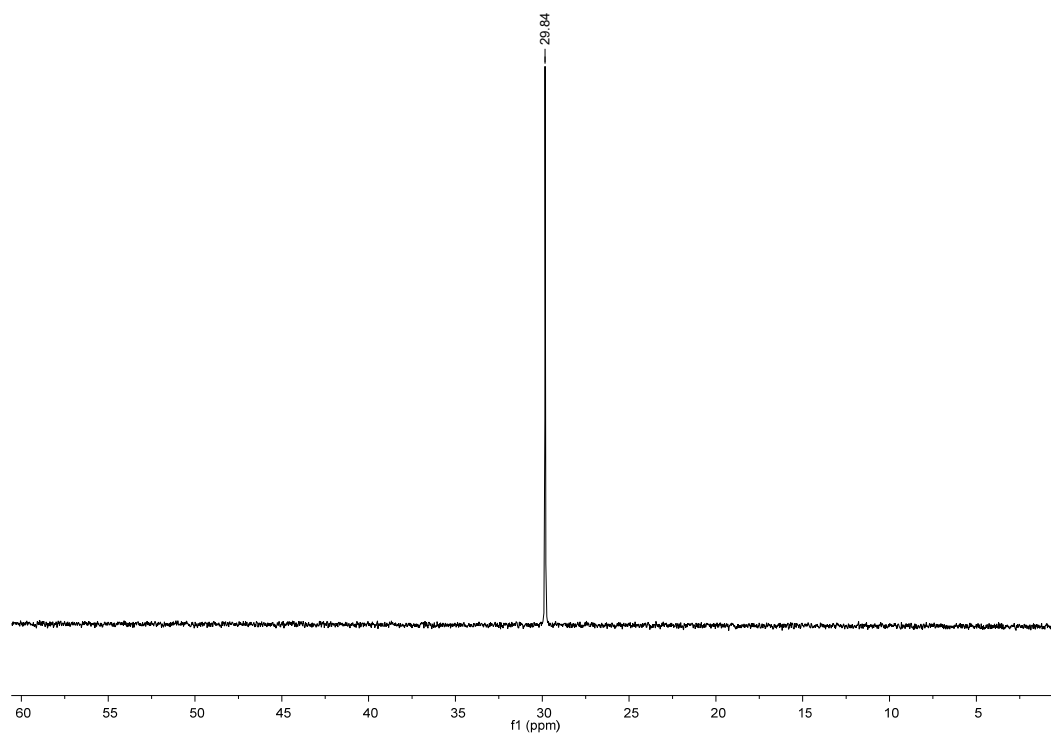

$^{13}\text{C}$  NMR ( $\text{CDCl}_3/\text{CD}_3\text{OD}$ , 126 MHz):

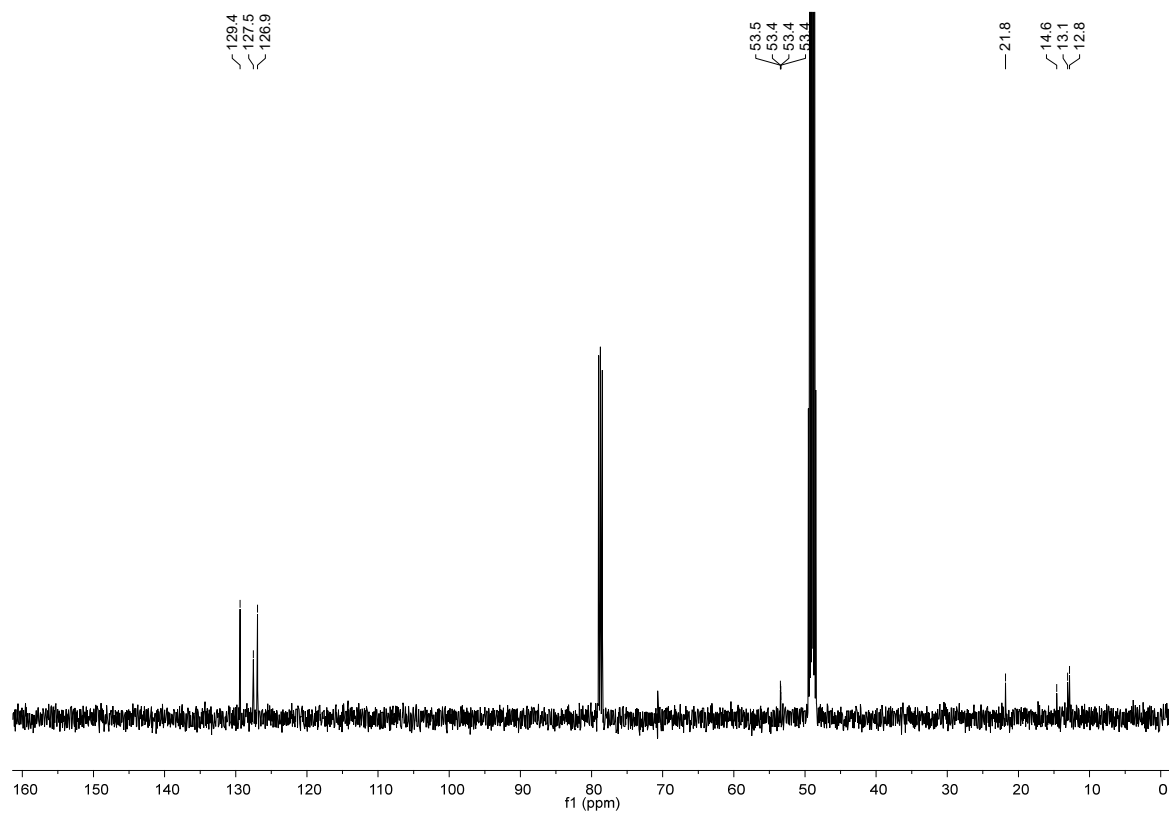

# Dimethyl 2-(4-fluoro)phenylcyclopropyl phosphonate (3b)

$^1\text{H}$  NMR ( $\text{CDCl}_3/\text{CD}_3\text{OD}$ , 500 MHz):

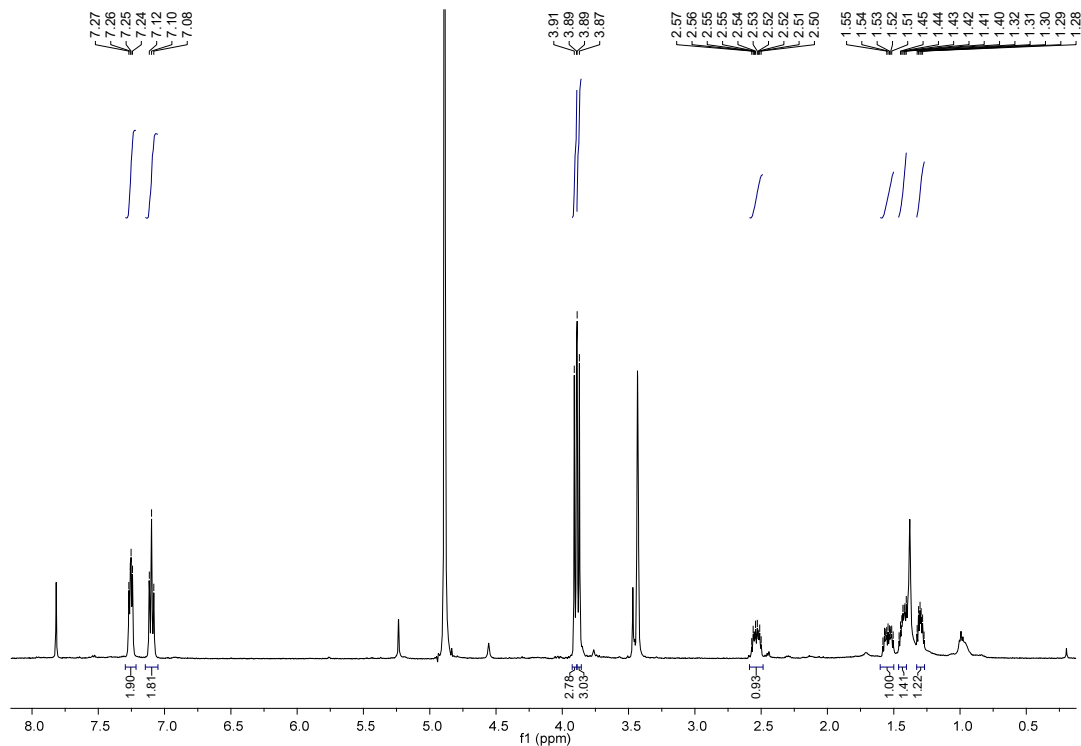

$^{19}\text{F}$  NMR ( $\text{CDCl}_3/\text{CD}_3\text{OD}$ , 376 MHz):

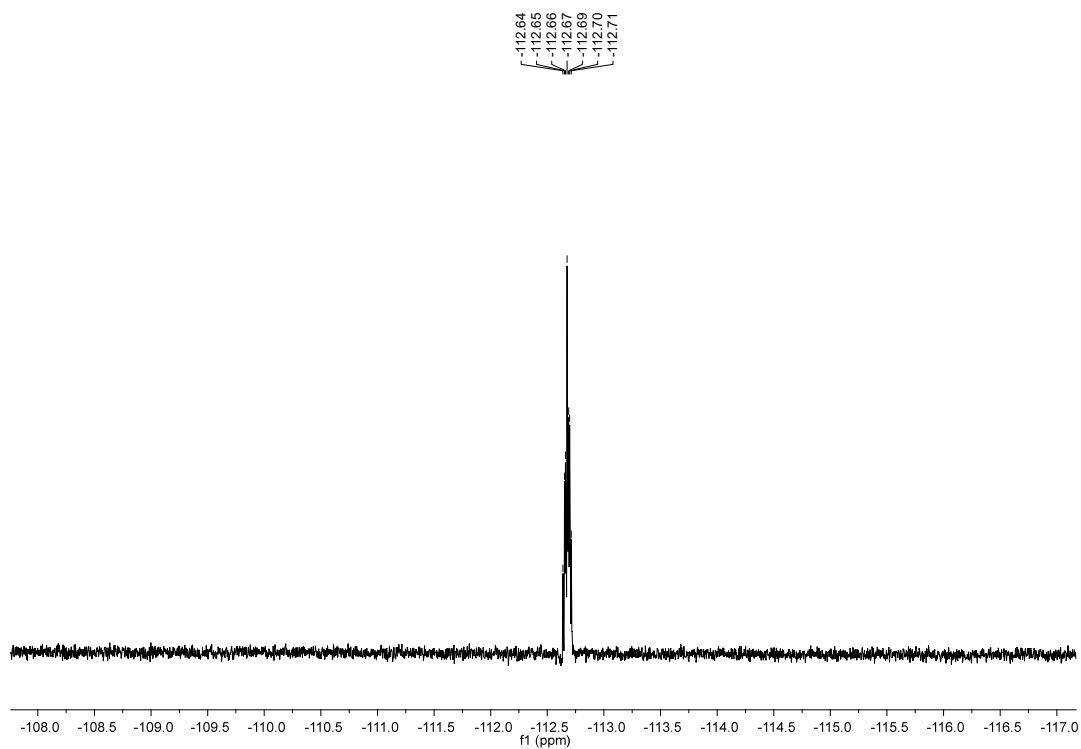

$^{31}\text{P}$  NMR ( $\text{CDCl}_3/\text{CD}_3\text{OD}$ , 162 MHz):

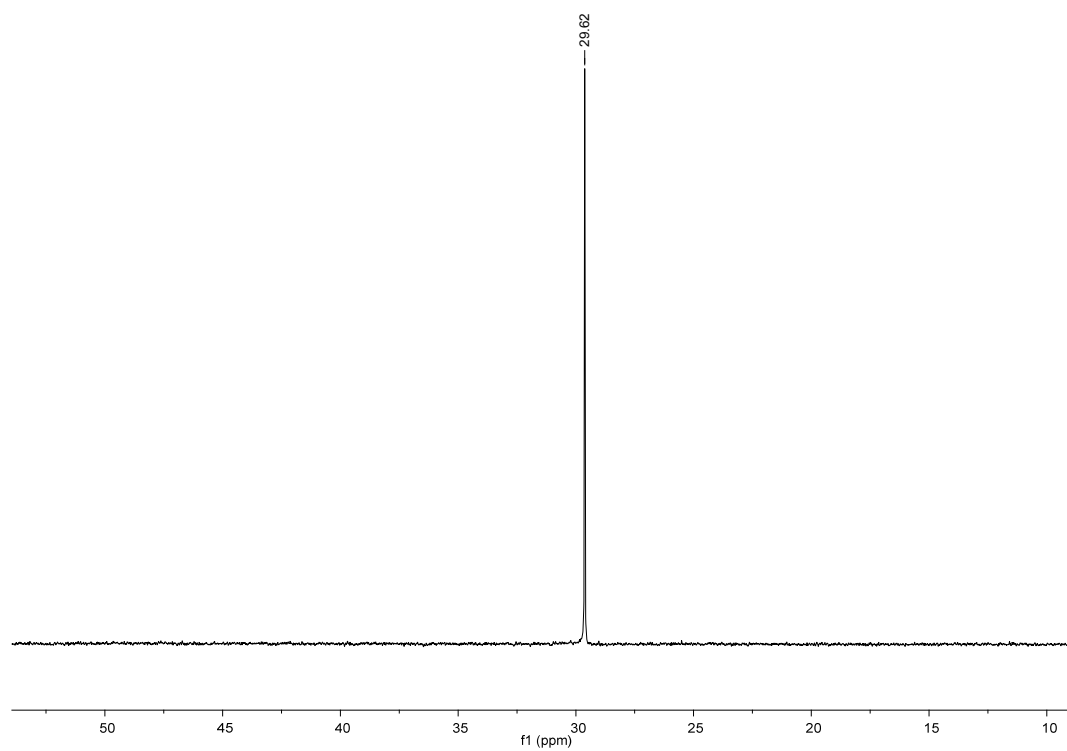

$^{13}\text{C}$  NMR ( $\text{CDCl}_3/\text{CD}_3\text{OD}$ , 126 MHz):

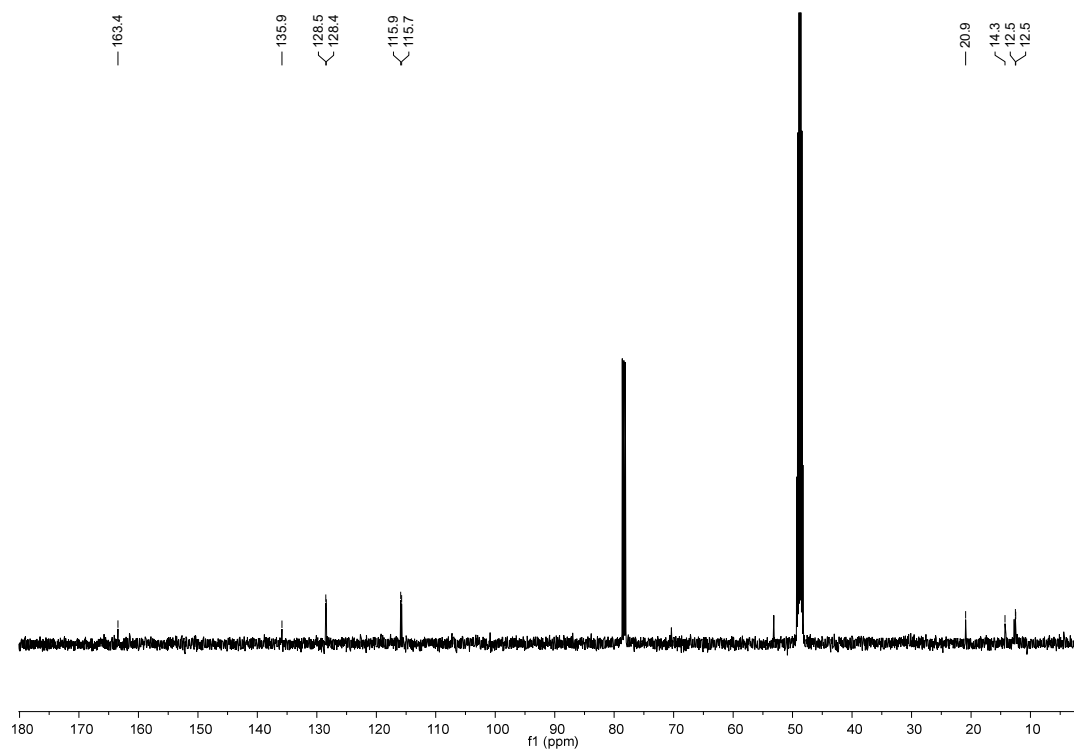

# Dimethyl 2-(4-chloro)phenylcyclopropyl phosphonate (3c)

$^1\text{H}$  NMR ( $\text{CDCl}_3/\text{CD}_3\text{OD}$ , 500 MHz):

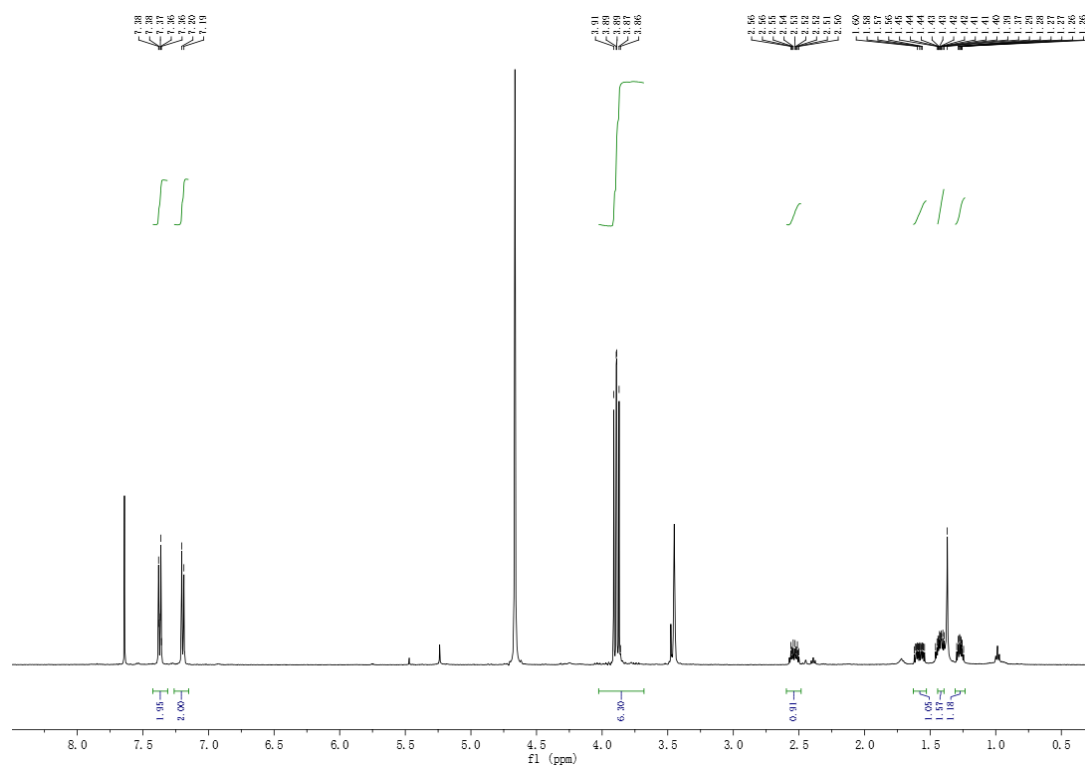

$^{31}\text{P}$  NMR ( $\text{CDCl}_3/\text{CD}_3\text{OD}$ , 162 MHz):

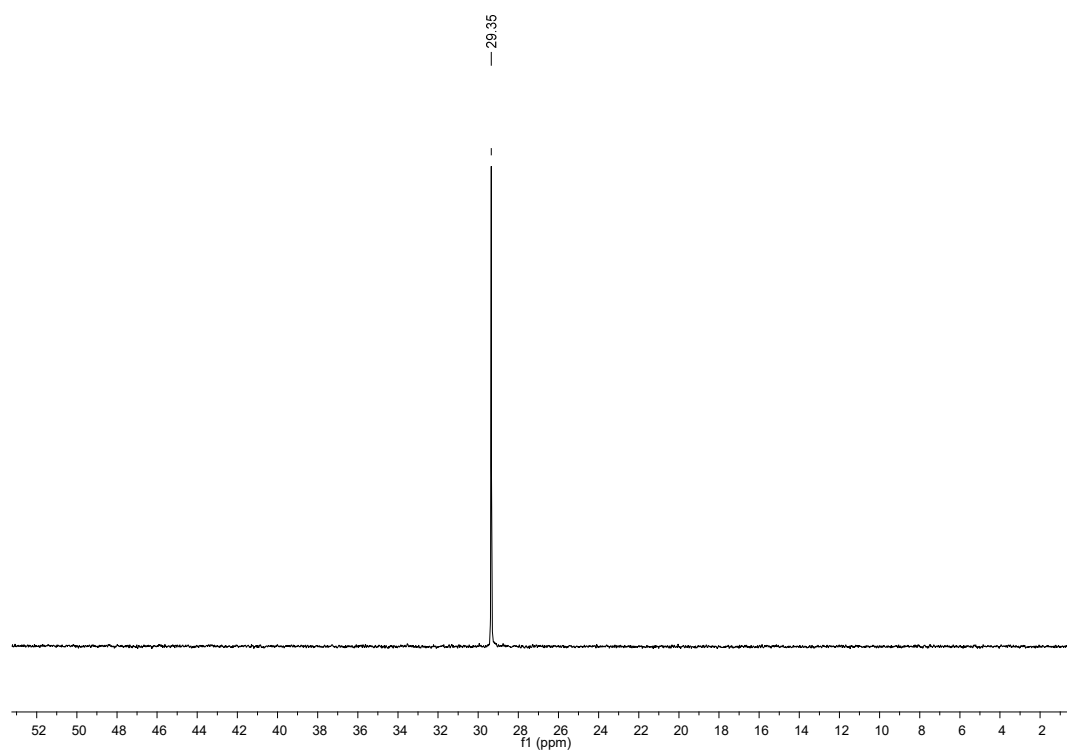

$^{13}\text{C}$  NMR ( $\text{CDCl}_3/\text{CD}_3\text{OD}$ , 126 MHz):

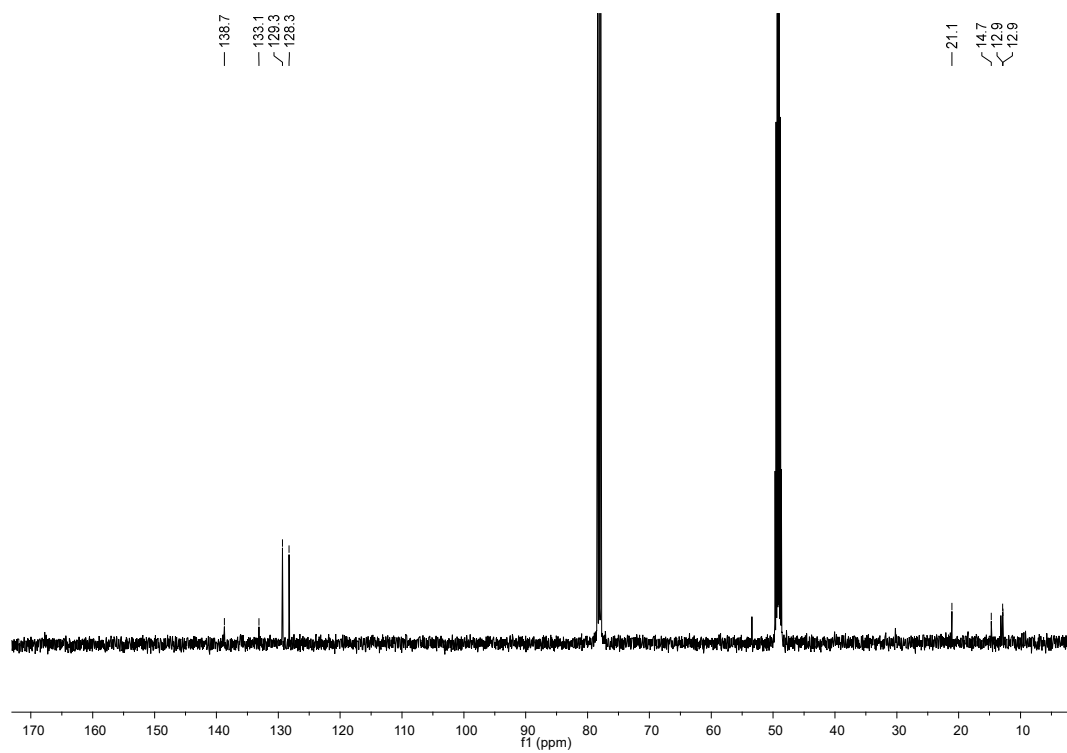



### Dimethyl 2-(4-bromo)phenylcyclopropyl phosphonate (3d)

$^1\text{H}$  NMR ( $\text{CDCl}_3/\text{CD}_3\text{OD}$ , 500 MHz):

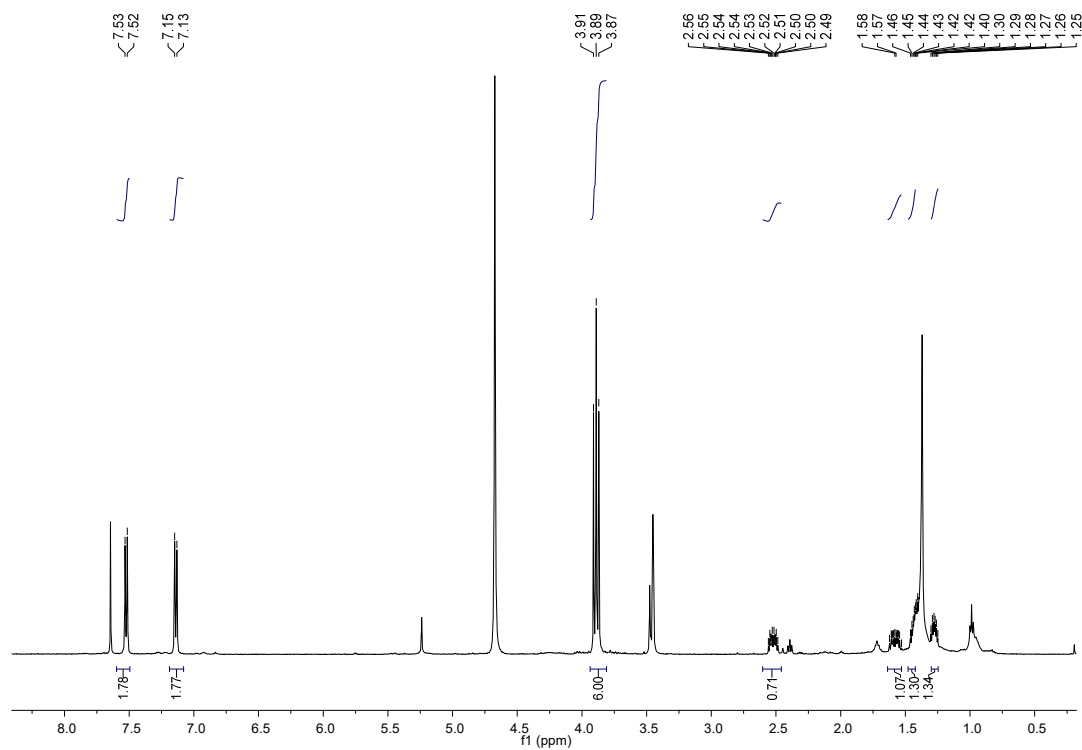

$^{31}\text{P}$  NMR ( $\text{CDCl}_3/\text{CD}_3\text{OD}$ , 162 MHz):

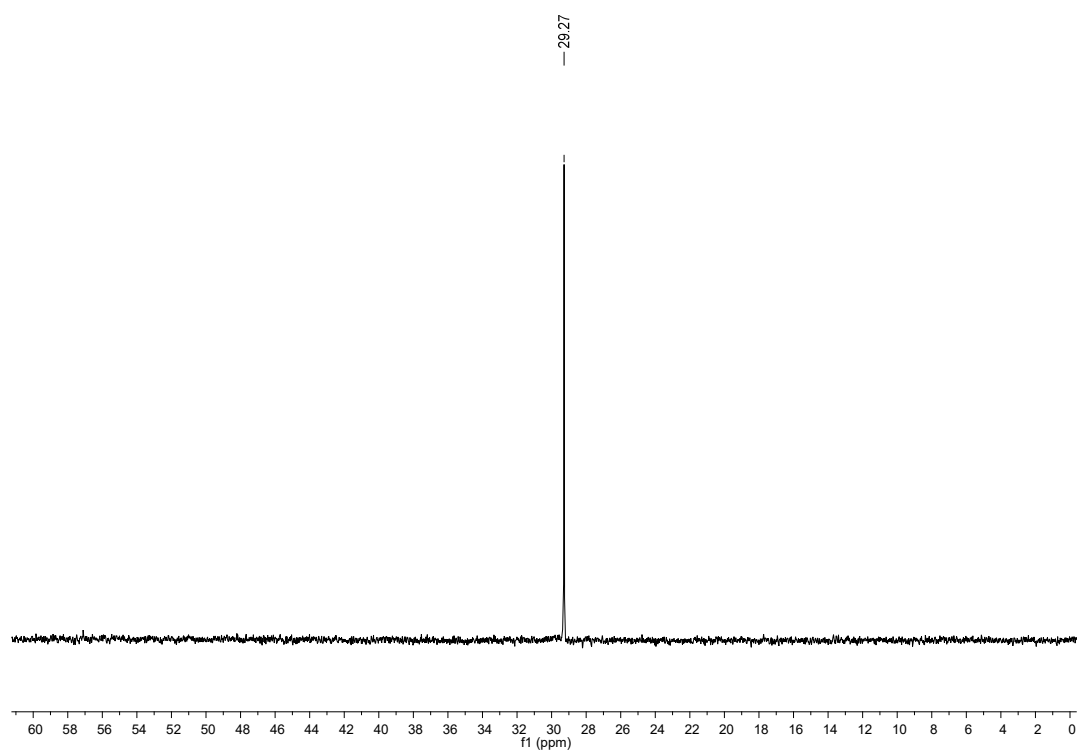

$^{13}\text{C}$  NMR ( $\text{CDCl}_3/\text{CD}_3\text{OD}$ , 126 MHz):

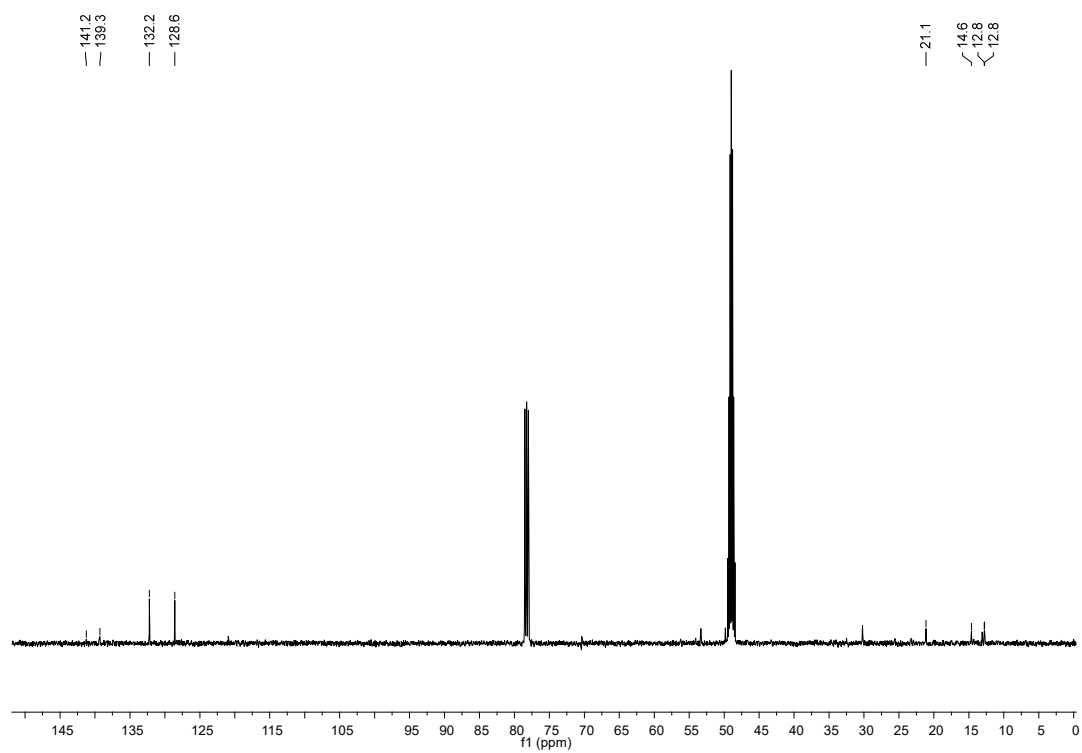

# Dimethyl 2-(4-trifluoromethyl)phenylcyclopropyl phosphonate (3e)

$^1\text{H}$  NMR ( $\text{CDCl}_3/\text{CD}_3\text{OD}$ , 500 MHz):

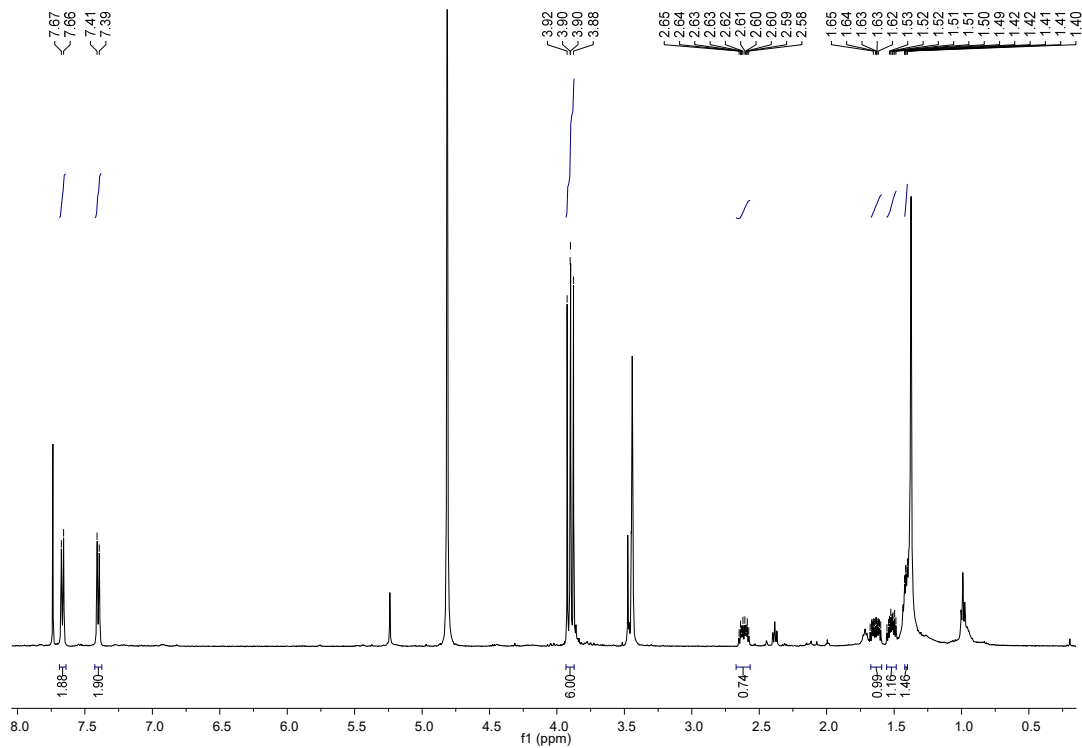

$^{19}\text{F}$  NMR ( $\text{CDCl}_3/\text{CD}_3\text{OD}$ , 376 MHz):

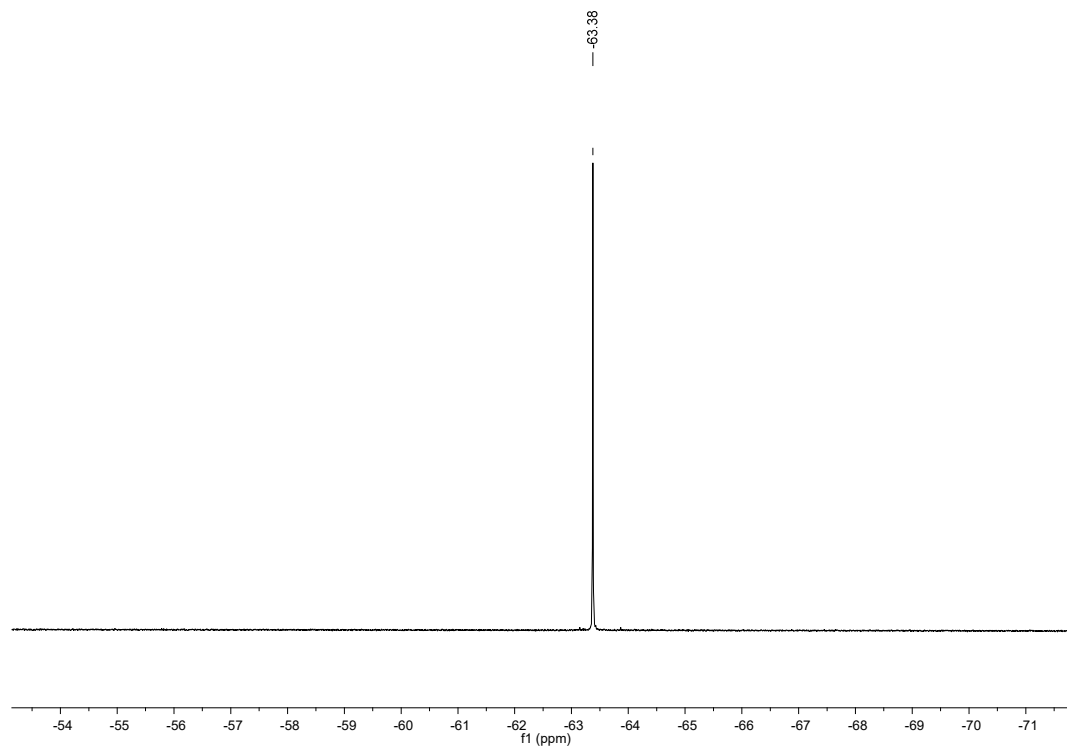

$^{31}\text{P}$  NMR ( $\text{CDCl}_3/\text{CD}_3\text{OD}$ , 162 MHz):

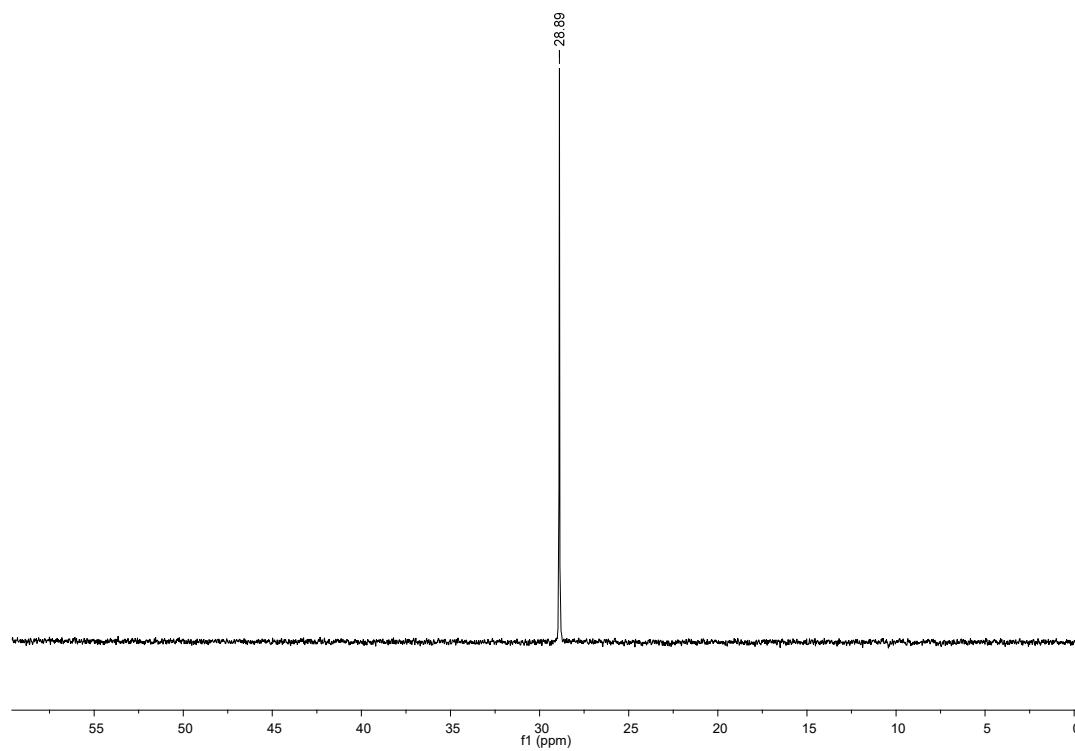

$^{13}\text{C}$  NMR ( $\text{CDCl}_3/\text{CD}_3\text{OD}$ , 126 MHz):

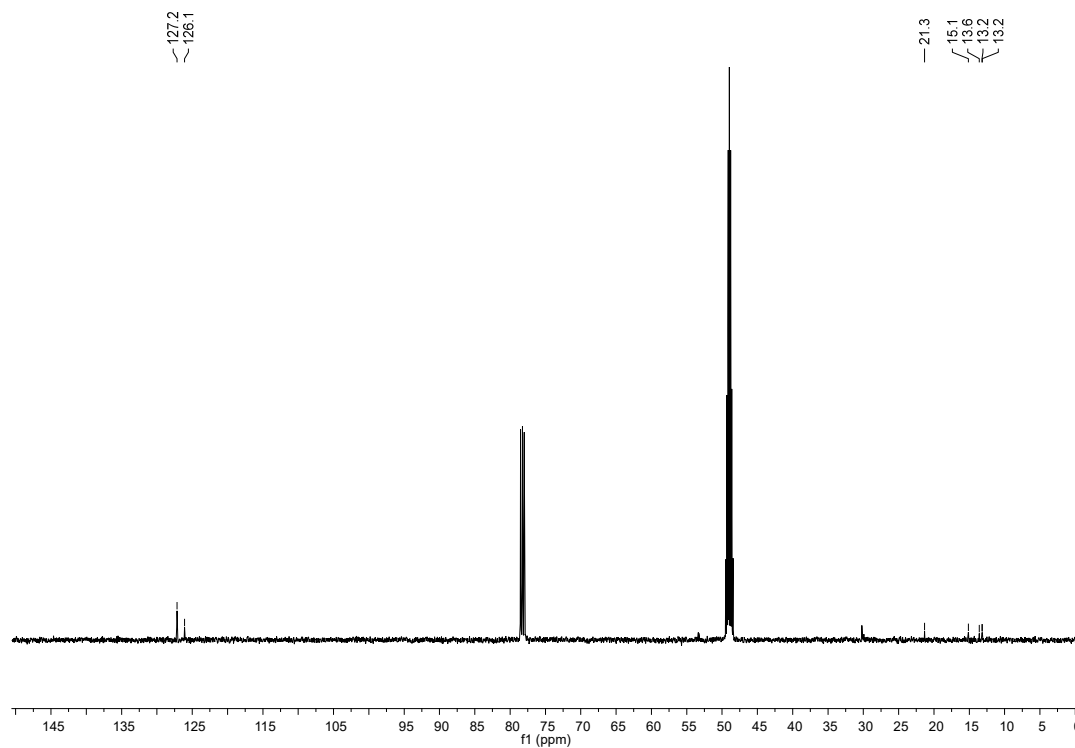

# Dimethyl 2-(4-methoxy)phenylcyclopropyl phosphonate (3f)

$^1\text{H}$  NMR ( $\text{CDCl}_3/\text{CD}_3\text{OD}$ , 500 MHz):

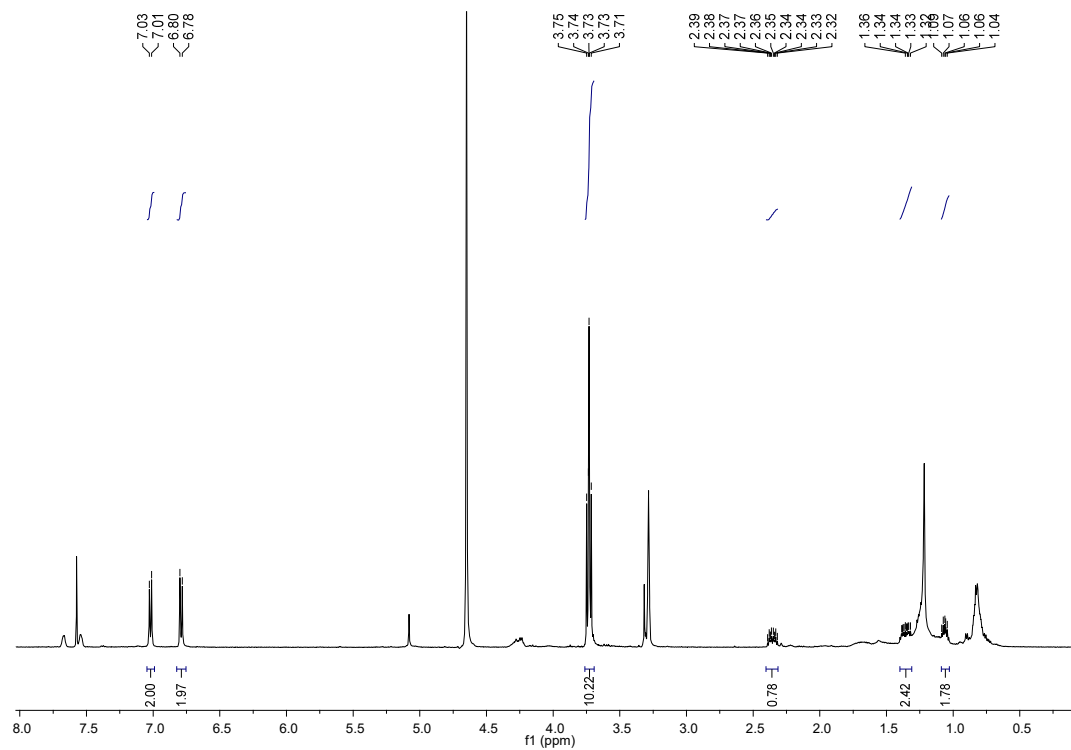

$^{31}\text{P}$  NMR ( $\text{CDCl}_3/\text{CD}_3\text{OD}$ , 162 MHz):

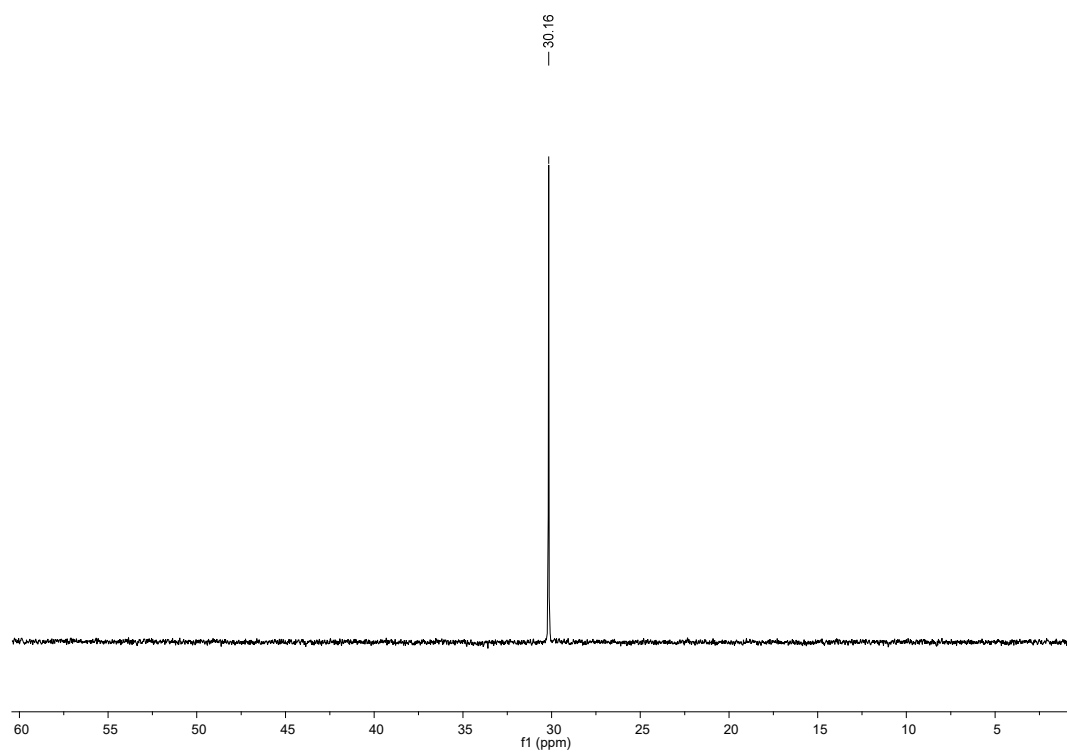

$^{13}\text{C}$  NMR ( $\text{CDCl}_3/\text{CD}_3\text{OD}$ , 126 MHz):

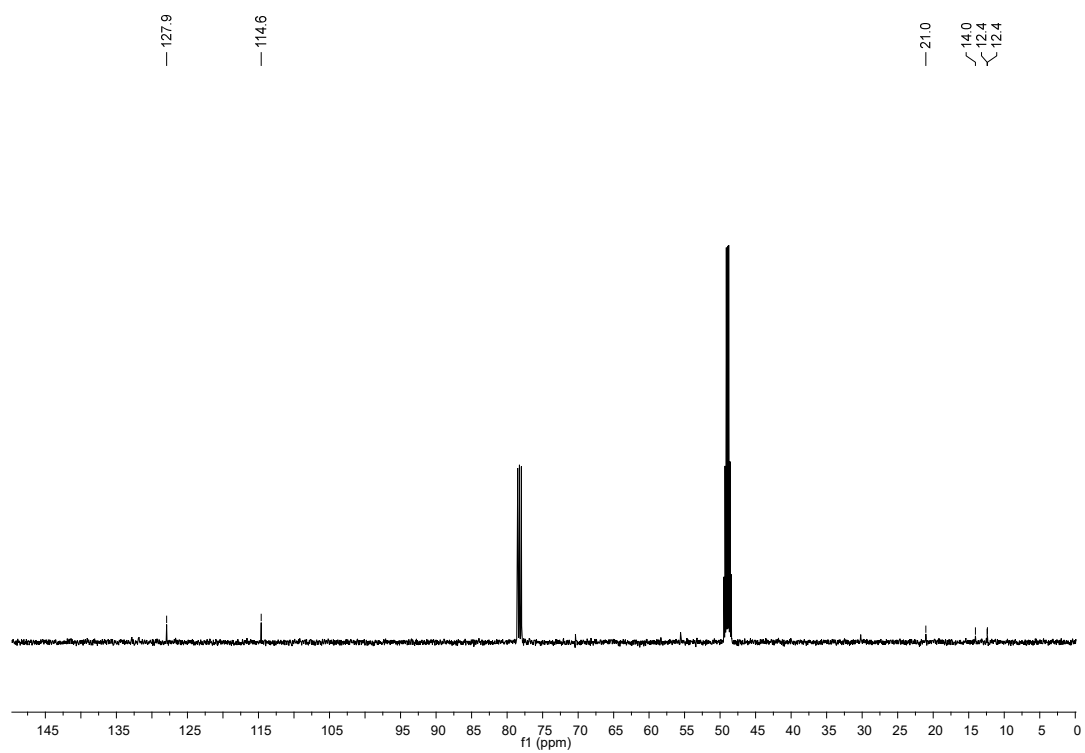

# Dimethyl 2-(4-methyl)phenylcyclopropyl phosphonate (3g)

$^1\text{H}$  NMR ( $\text{CDCl}_3/\text{CD}_3\text{OD}$ , 500 MHz):

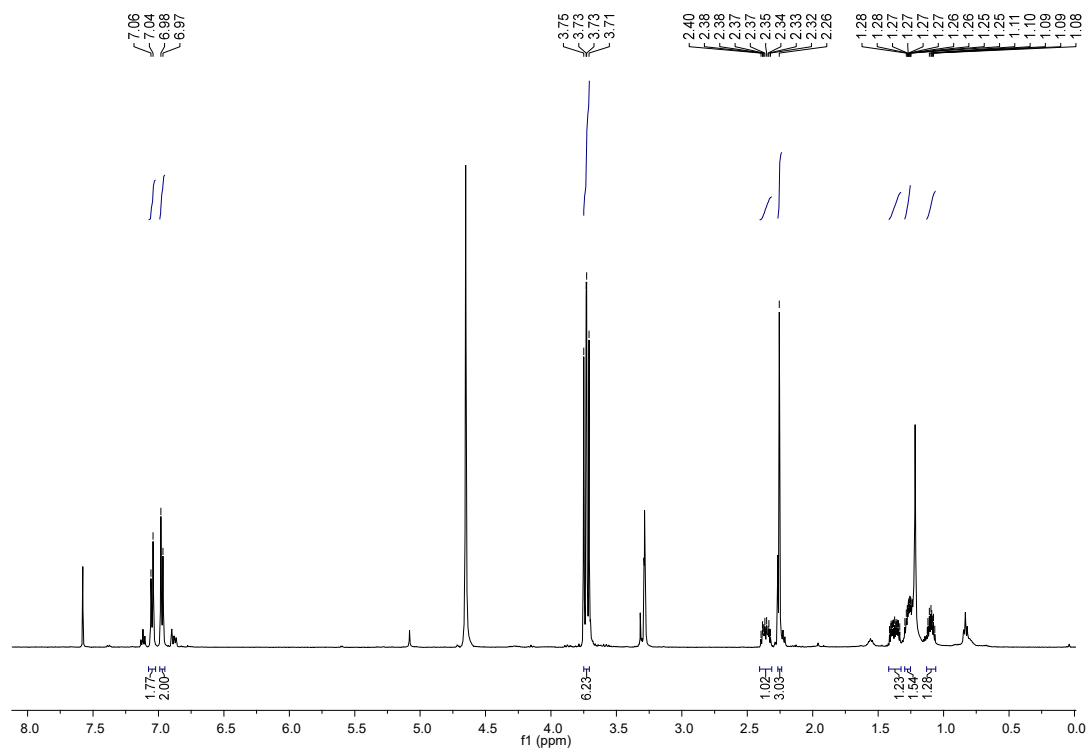

$^{31}\text{P}$  NMR ( $\text{CDCl}_3/\text{CD}_3\text{OD}$ , 162 MHz):

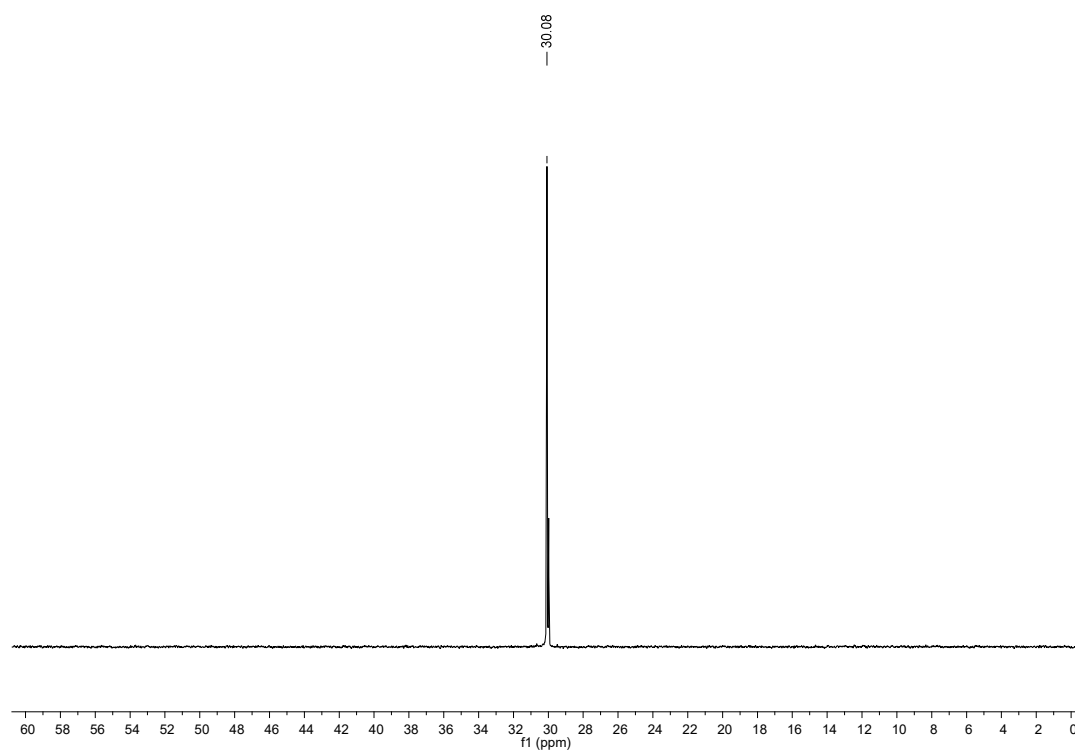

$^{13}\text{C}$  NMR ( $\text{CDCl}_3/\text{CD}_3\text{OD}$ , 126 MHz):

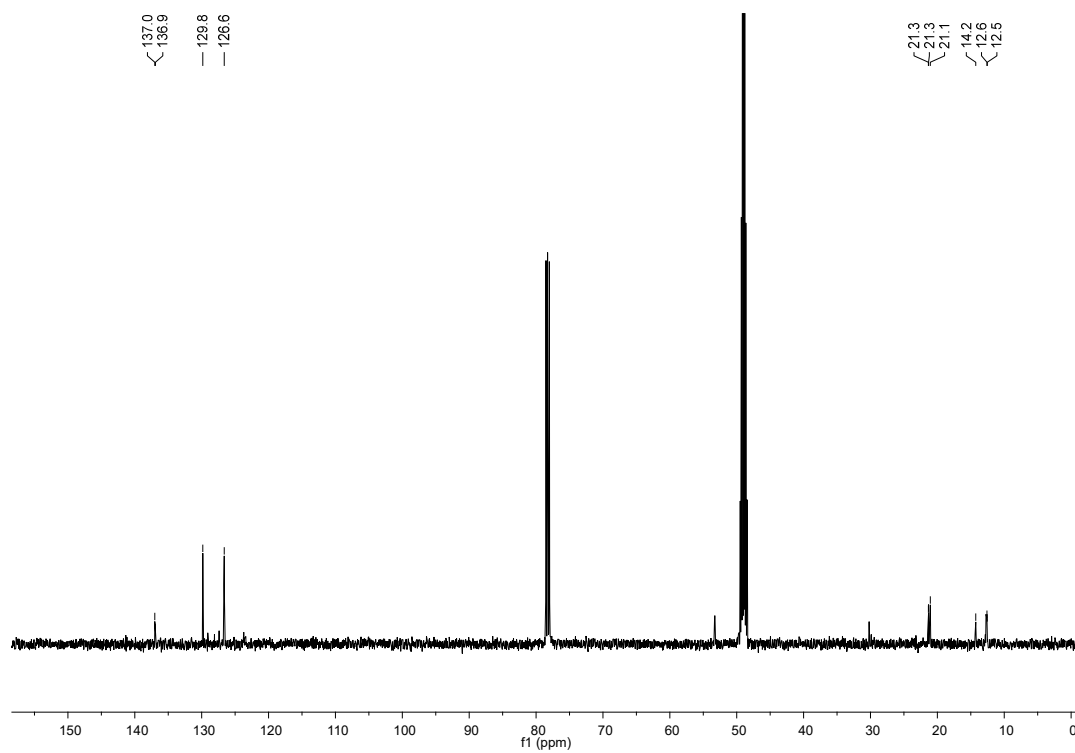



# Dimethyl 2-(3-methyl)phenylcyclopropyl phosphonate (3h)

$^1\text{H}$  NMR ( $\text{CDCl}_3/\text{CD}_3\text{OD}$ , 500 MHz):

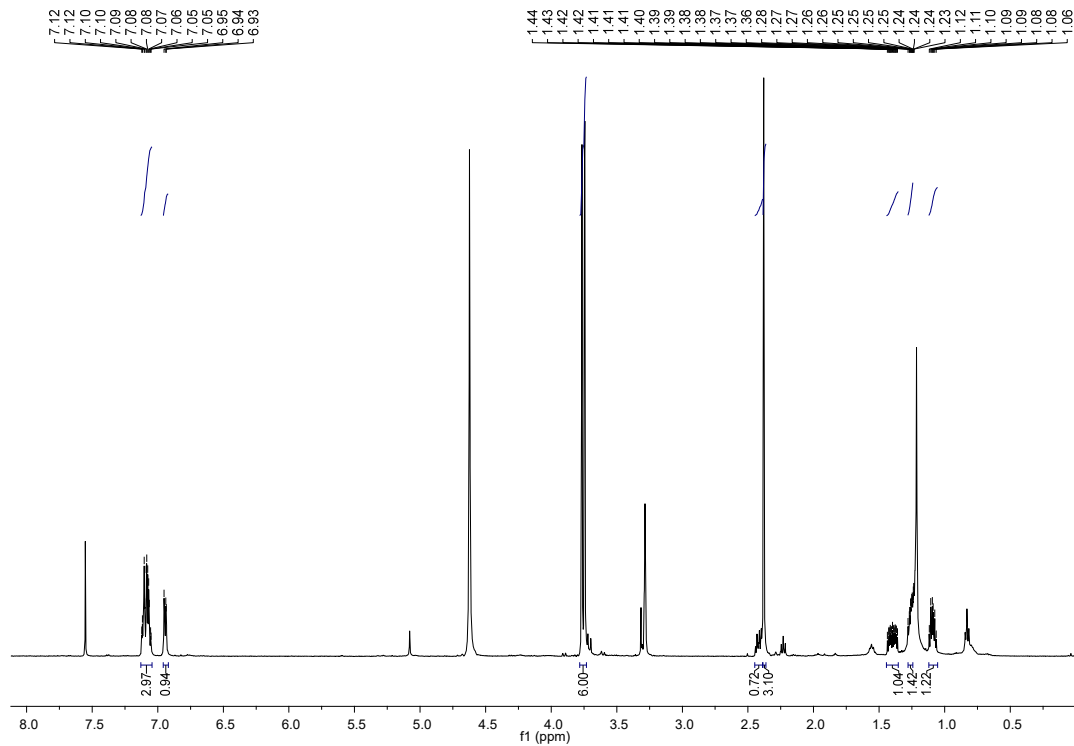

$^{31}\text{P}$  NMR ( $\text{CDCl}_3/\text{CD}_3\text{OD}$ , 162 MHz):

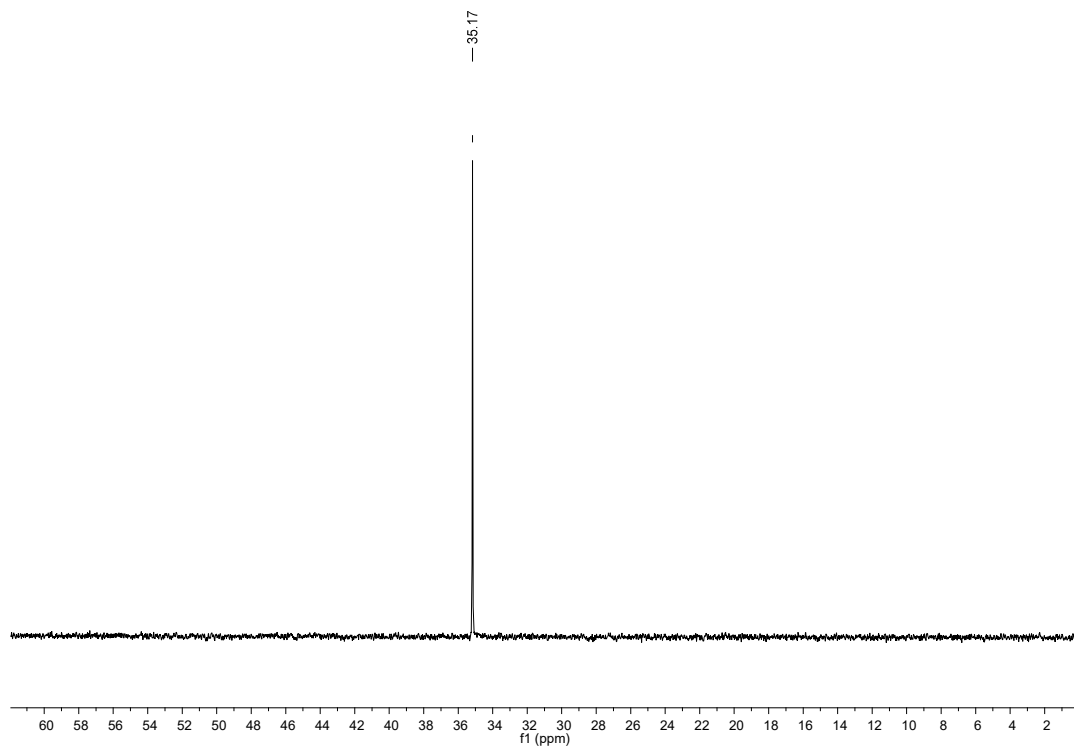

$^{13}\text{C}$  NMR ( $\text{CDCl}_3/\text{CD}_3\text{OD}$ , 126 MHz):

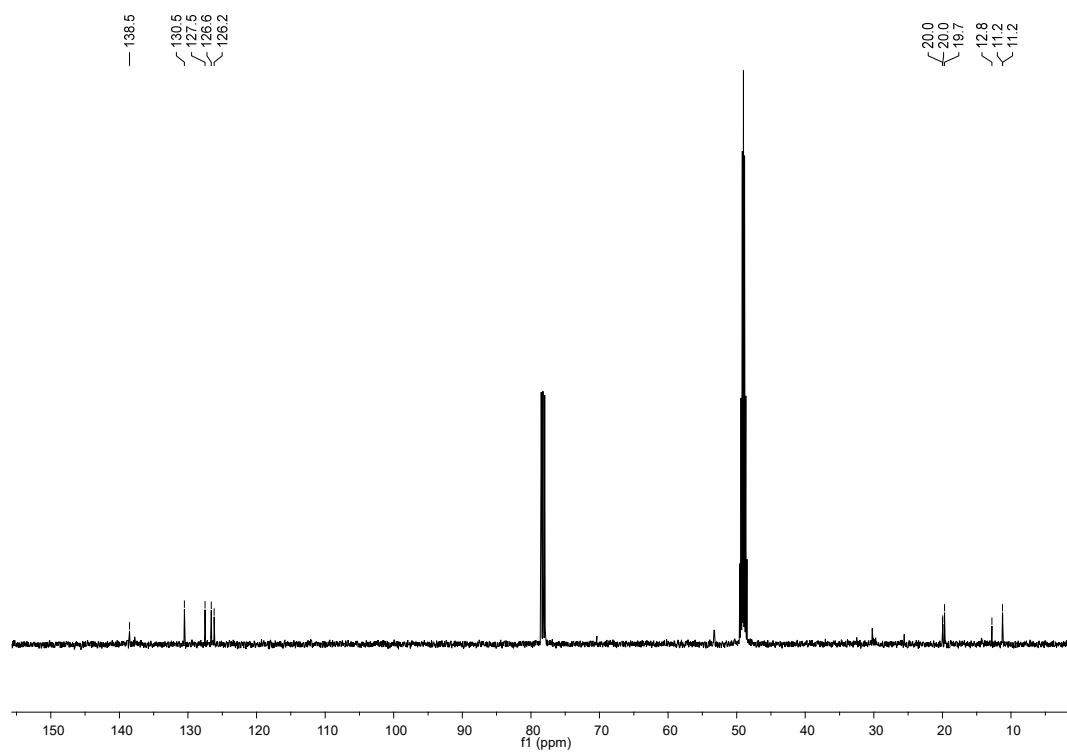

### Dimethyl 2-(2-methyl)phenylcyclopropyl phosphonate (3i)

$^1\text{H}$  NMR ( $\text{CDCl}_3/\text{CD}_3\text{OD}$ , 500 MHz):

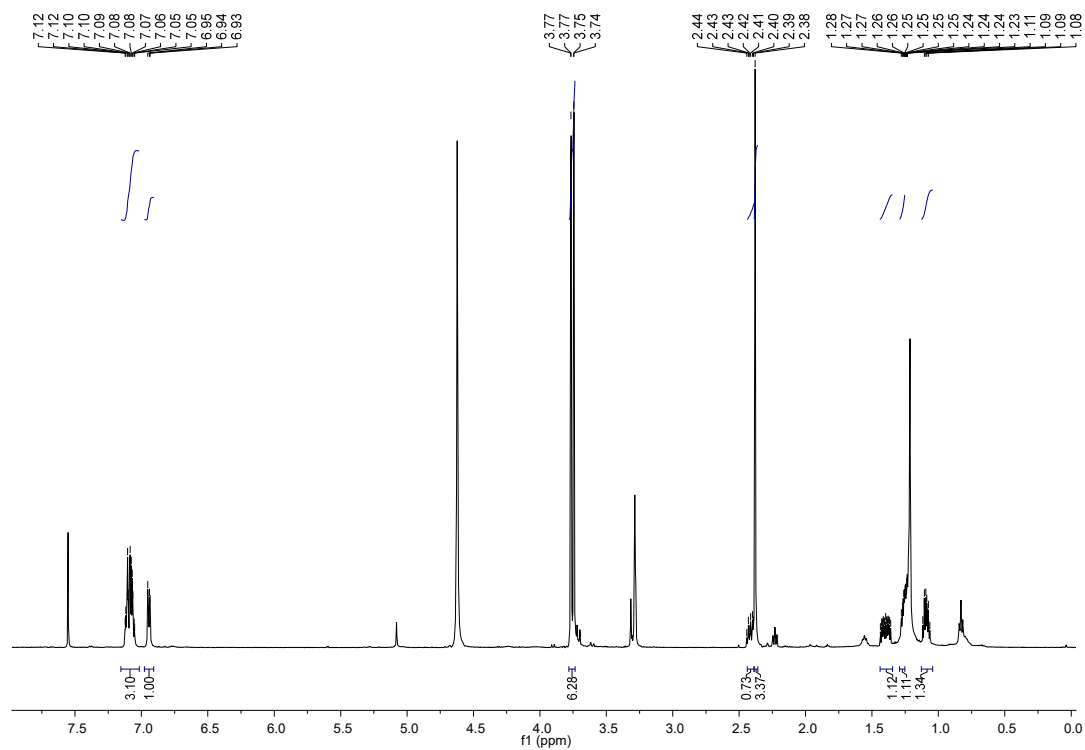

$^{31}\text{P}$  NMR ( $\text{CDCl}_3/\text{CD}_3\text{OD}$ , 162 MHz):

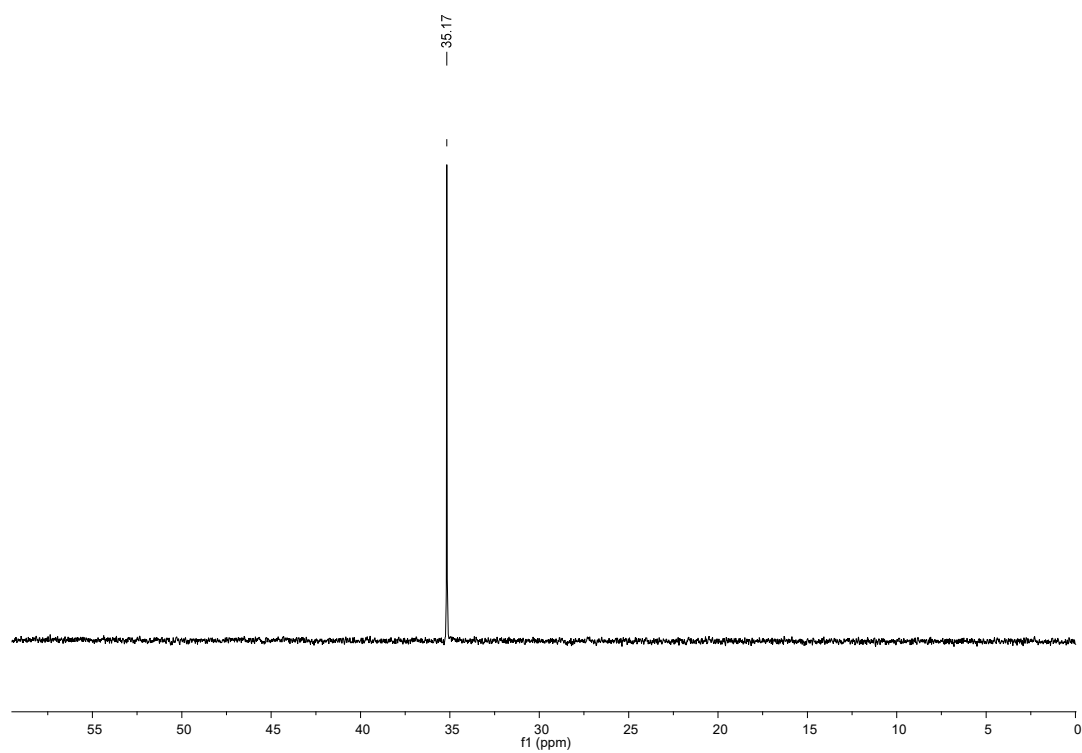

$^{13}\text{C}$  NMR ( $\text{CDCl}_3/\text{CD}_3\text{OD}$ , 126 MHz):

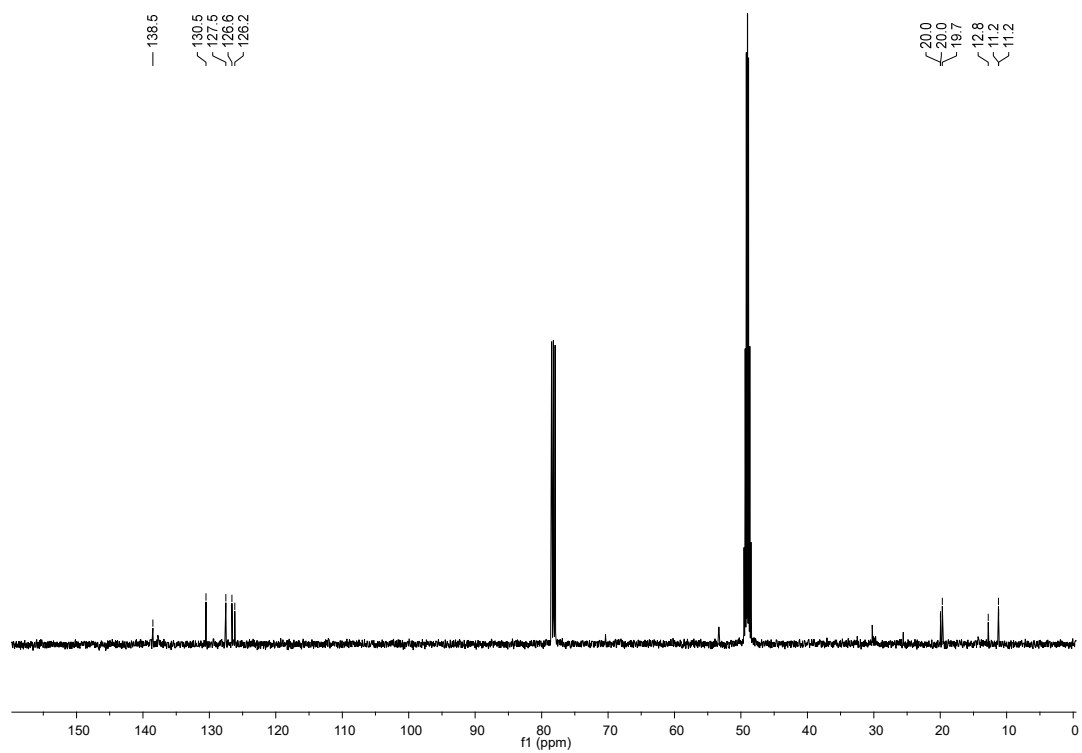

# Dimethyl 2-(3-bromo)phenylcyclopropyl phosphonate (3j)

$^1\text{H}$  NMR ( $\text{CDCl}_3/\text{CD}_3\text{OD}$ , 500 MHz):

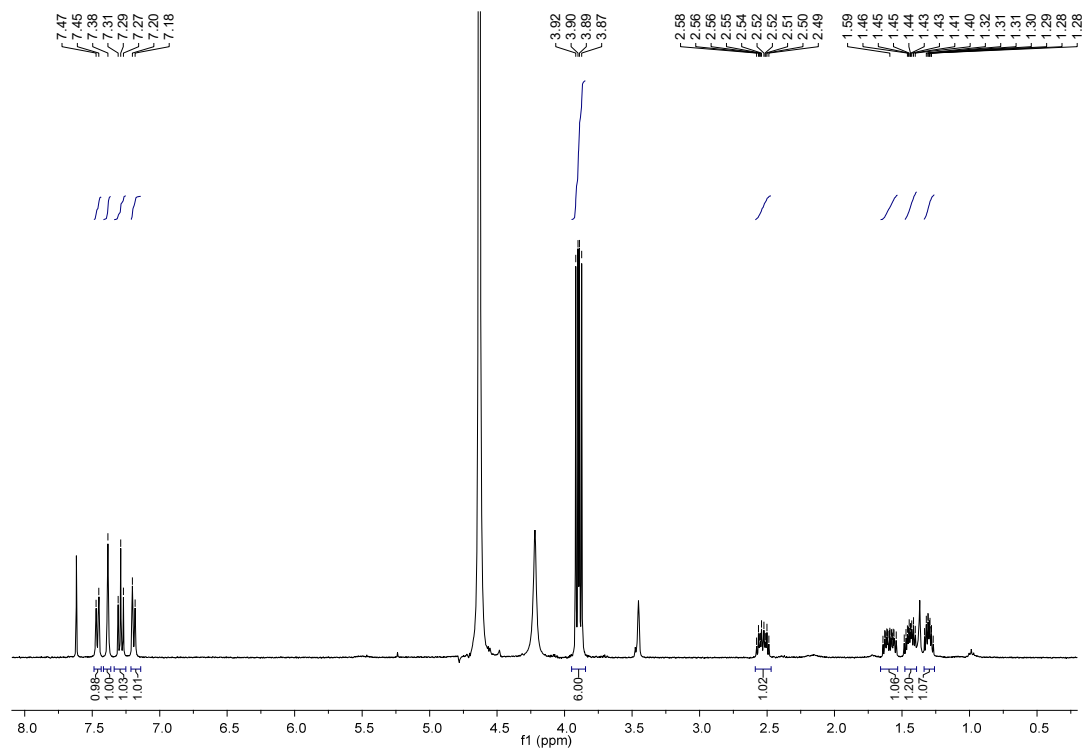

$^{31}\text{P}$  NMR ( $\text{CDCl}_3/\text{CD}_3\text{OD}$ , 162 MHz):

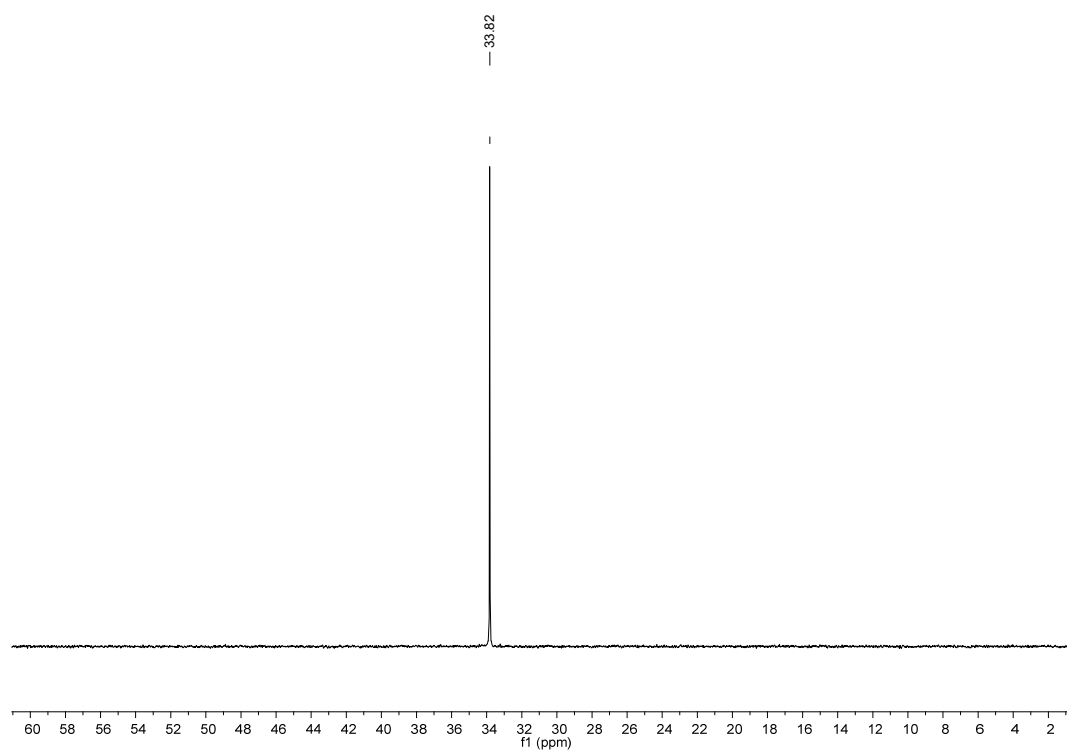

$^{13}\text{C}$  NMR ( $\text{CDCl}_3/\text{CD}_3\text{OD}$ , 126 MHz):

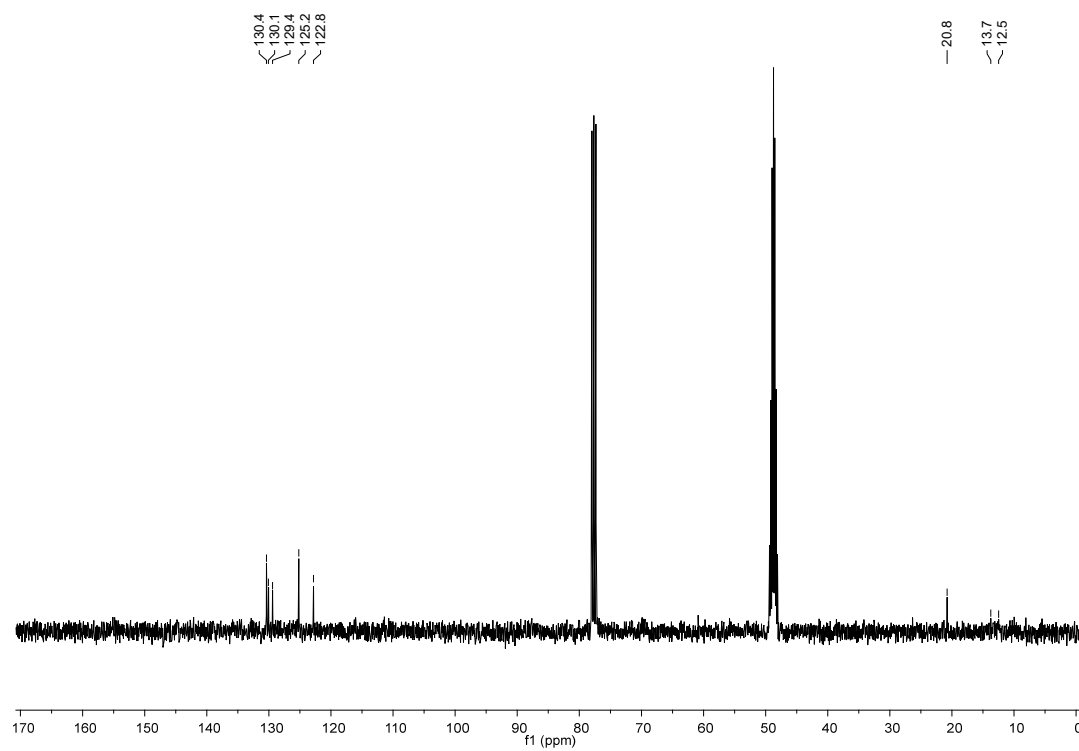

# Dimethyl 2-(2-naphthyl)phenylcyclopropyl phosphonate (3k)

$^1\text{H}$  NMR ( $\text{CDCl}_3/\text{CD}_3\text{OD}$ , 500 MHz):

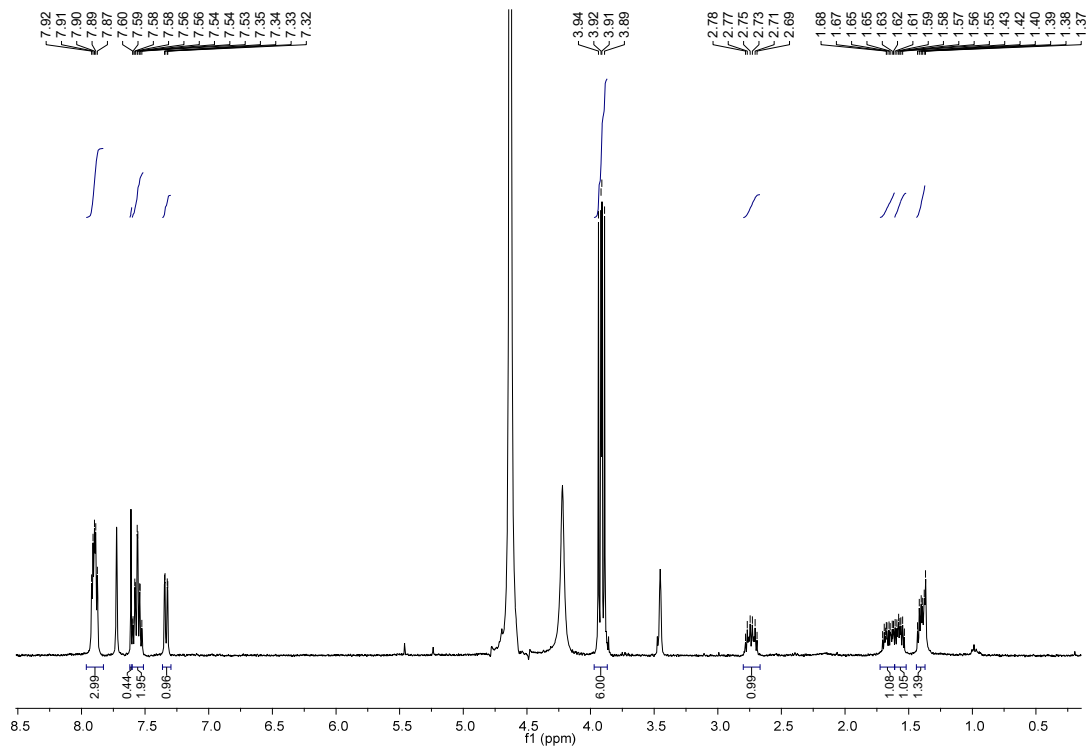

$^{31}\text{P}$  NMR ( $\text{CDCl}_3/\text{CD}_3\text{OD}$ , 162 MHz):

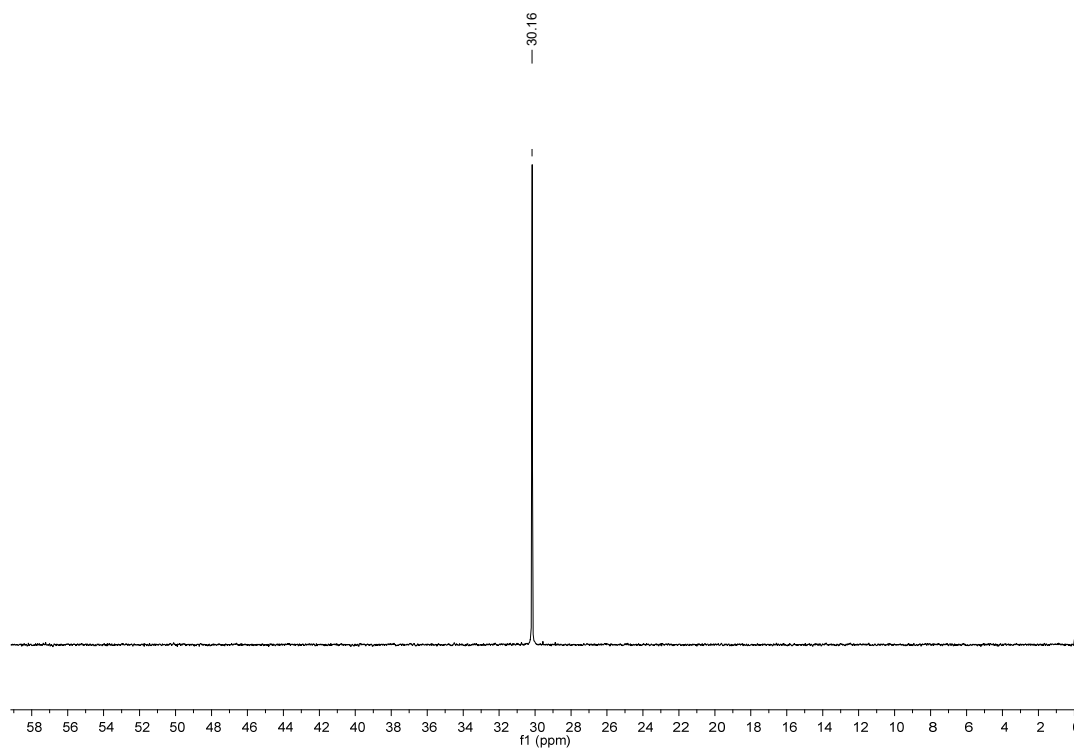

$^{13}\text{C}$  NMR ( $\text{CDCl}_3/\text{CD}_3\text{OD}$ , 126 MHz):

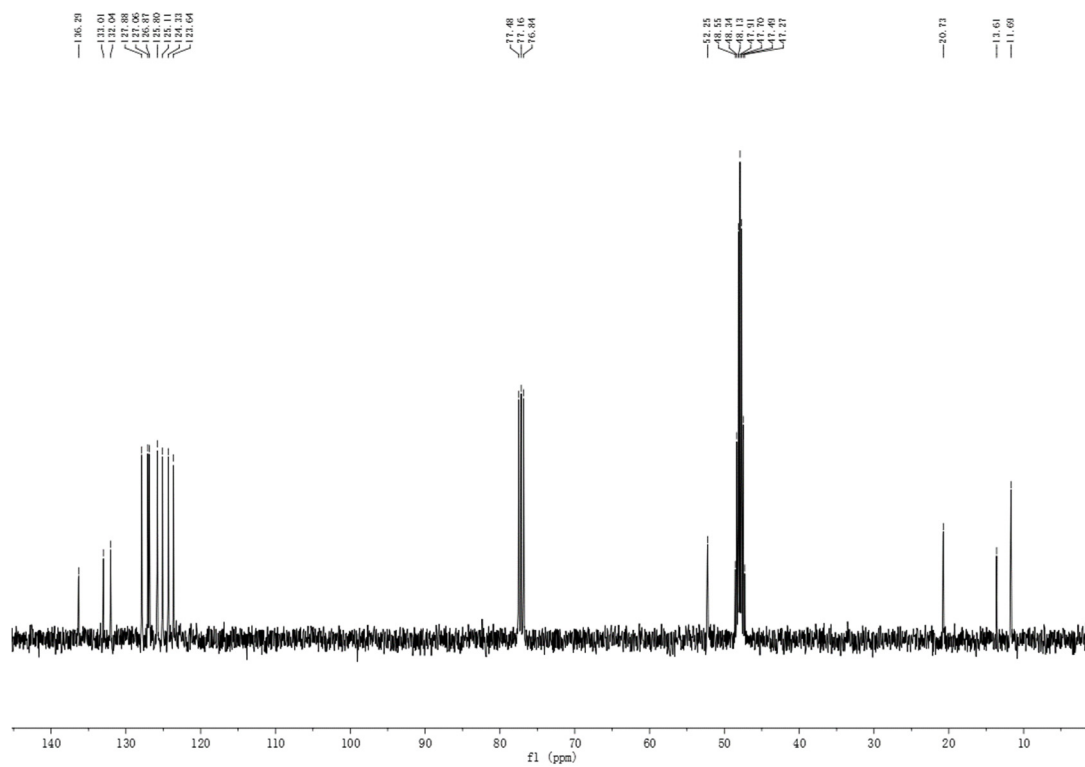



# Dimethyl 2-methyl-2-phenylcyclopropyl phosphonate (3I)

$^1\text{H}$  NMR ( $\text{CDCl}_3/\text{CD}_3\text{OD}$ , 500 MHz):

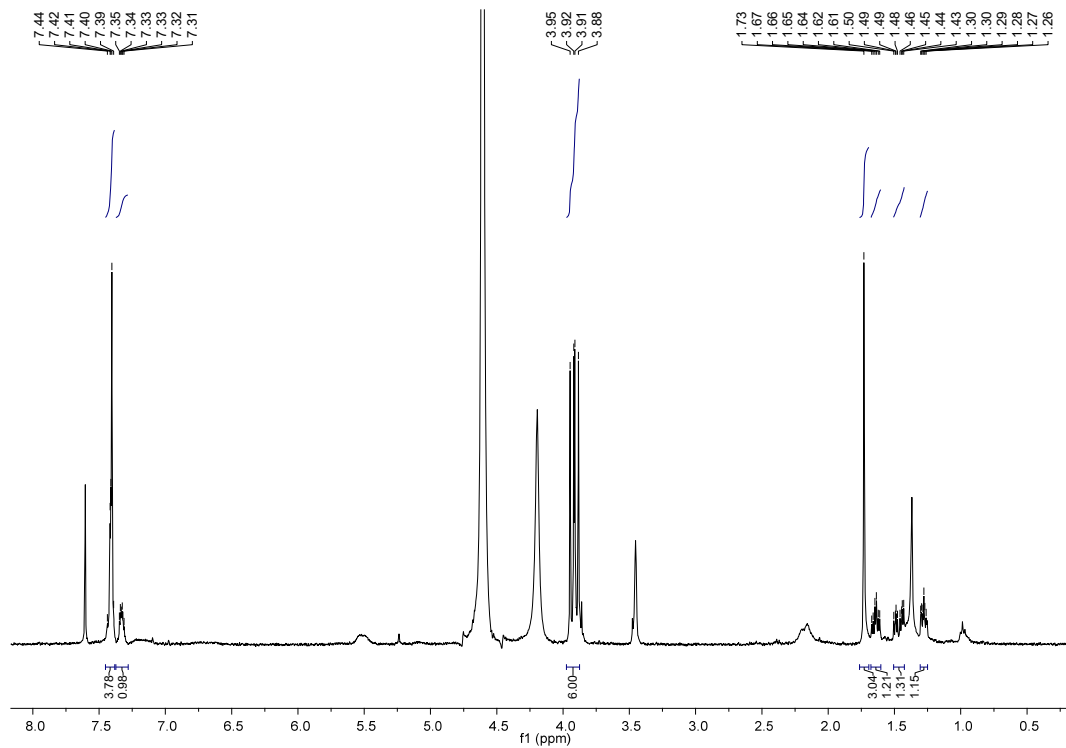

$^{31}\text{P}$  NMR ( $\text{CDCl}_3/\text{CD}_3\text{OD}$ , 162 MHz):

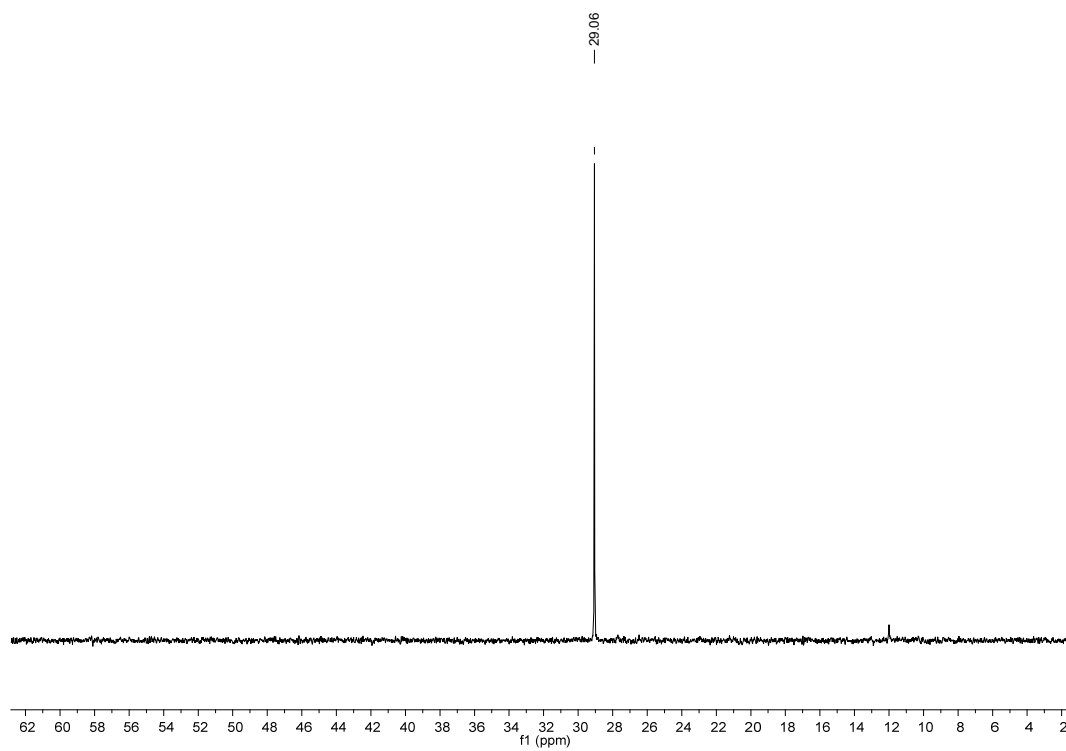

$^{13}\text{C}$  NMR ( $\text{CDCl}_3/\text{CD}_3\text{OD}$ , 126 MHz):

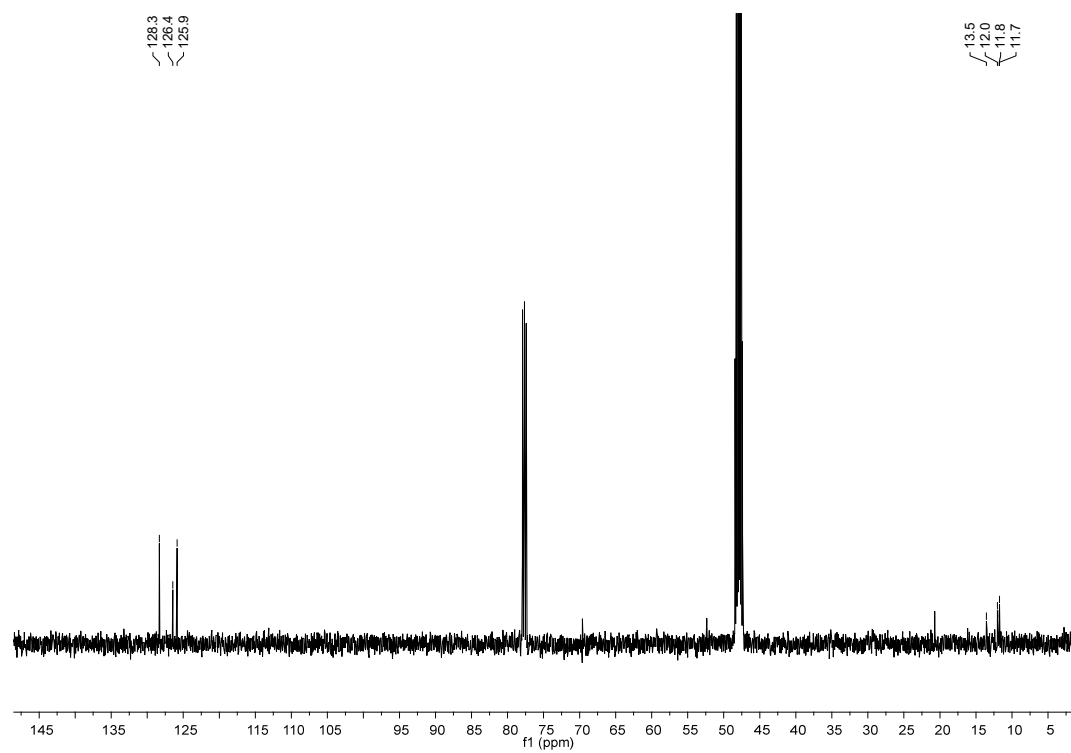

## Atom coordinates of optimized molecular geometries

heme

|   |                 |                 |                 |
|---|-----------------|-----------------|-----------------|
| C | 2.749805172928  | -1.820746915555 | 2.154295453198  |
| C | 3.847666519688  | -1.567042278919 | 0.301228755121  |
| C | 4.688951926296  | -2.210435453509 | 1.164146344461  |
| N | 2.641779717112  | -1.329875997230 | 0.930984281655  |
| N | 3.976048111598  | -2.362676229092 | 2.333437472359  |
| H | 5.699658492305  | -2.562948540068 | 1.055233124973  |
| H | 4.021431081126  | -1.261371325624 | -0.715521535242 |
| H | 1.984725561730  | -1.801346861701 | 2.910961934290  |
| H | 4.304445833764  | -2.800883993964 | 3.179992580722  |
| N | 0.731874205721  | 0.702234410068  | 1.808052490081  |
| N | 2.111873745069  | 1.070984187369  | -0.657952857787 |
| N | -0.242055234300 | -1.806207526395 | 0.887779237964  |
| N | 1.137950724395  | -1.437210421471 | -1.578187844410 |
| C | -0.029188851341 | 0.382689364117  | 2.906604207565  |
| C | 2.665009331781  | 1.105106185802  | -1.914899529479 |
| C | 1.288935585250  | 1.927273468570  | 2.082957752800  |
| C | 2.484130115600  | 2.246899362212  | -0.053911749356 |
| C | -0.874981160743 | -1.795859530189 | 2.107386711614  |
| C | 1.819319581715  | -1.072859973132 | -2.713967758696 |
| C | -0.616601047789 | -2.980855290446 | 0.282395709667  |
| C | 0.578681505218  | -2.660812306524 | -1.854361315993 |
| C | 0.050796189790  | 1.432304596318  | 3.896454705819  |
| C | 3.403774015726  | 2.332245505877  | -2.106367789651 |
| C | 0.869992377971  | 2.389001691578  | 3.386372621977  |

|    |                 |                 |                 |
|----|-----------------|-----------------|-----------------|
| C  | 3.293645697901  | 3.039075763144  | -0.951337092077 |
| C  | -1.667155398887 | -2.992904500234 | 2.273107720187  |
| C  | 1.685923030472  | -2.092217289208 | -3.729549285039 |
| C  | -1.505051970417 | -3.728570623517 | 1.142159981261  |
| C  | 0.918677736733  | -3.078072116901 | -3.195449936628 |
| H  | -0.464317862876 | 1.425991073422  | 4.846315686310  |
| H  | 3.925360664696  | 2.603847767408  | -3.012860317985 |
| H  | 1.163844565080  | 3.328432882398  | 3.832111364643  |
| H  | 3.705521236880  | 4.010020853584  | -0.716489901308 |
| H  | -2.268110735183 | -3.220446052876 | 3.141839945069  |
| H  | 2.121998803731  | -2.040879013480 | -4.716844739488 |
| H  | -1.946401615377 | -4.682919003762 | 0.893176260918  |
| H  | 0.595366336082  | -4.000852892083 | -3.655313323393 |
| C  | -0.772481040221 | -0.782257535791 | 3.052322497756  |
| C  | 2.536560409513  | 0.106388263436  | -2.872023265559 |
| C  | -0.222809734995 | -3.389214049393 | -0.985261494662 |
| C  | 2.118019757229  | 2.640045535737  | 1.226597280339  |
| H  | -1.328236790561 | -0.904967577397 | 3.974954771005  |
| H  | 3.027833832178  | 0.265323681275  | -3.825166421301 |
| H  | -0.597025062562 | -4.343678500841 | -1.337541904439 |
| H  | 2.486230361833  | 3.597962680155  | 1.575819711854  |
| Fe | 1.054584278143  | -0.434715473170 | 0.171319458885  |

styrene

|   |                 |                 |                 |
|---|-----------------|-----------------|-----------------|
| C | -1.934906635562 | -0.433978391447 | -2.043015267929 |
| H | -1.762694136967 | -1.350249406847 | -1.489108934526 |
| H | -1.140319122703 | -0.116328715509 | -2.707507575872 |

|                                   |                 |                 |                 |
|-----------------------------------|-----------------|-----------------|-----------------|
| C                                 | -3.057189615149 | 0.281991091762  | -1.929571367108 |
| H                                 | -3.146328446629 | 1.189307582172  | -2.523118469822 |
| C                                 | -4.224463775040 | -0.006757632312 | -1.079463877906 |
| C                                 | -4.304860641482 | -1.130709730914 | -0.239249816805 |
| H                                 | -3.481826249103 | -1.834394577295 | -0.196319000685 |
| C                                 | -5.314361843955 | 0.877299330874  | -1.102465652253 |
| H                                 | -5.271769857168 | 1.751094581919  | -1.744626463115 |
| C                                 | -5.430542301772 | -1.356451312415 | 0.543270258244  |
| H                                 | -5.471695022598 | -2.229977054434 | 1.184496875998  |
| C                                 | -6.443456606506 | 0.652278039511  | -0.318558008238 |
| H                                 | -7.272240124341 | 1.350477289546  | -0.354427488886 |
| C                                 | -6.506411674514 | -0.466478817105 | 0.508319942604  |
| H                                 | -7.382933946512 | -0.646122277505 | 1.120344846301  |
|                                   |                 |                 |                 |
| N <sub>2</sub>                    |                 |                 |                 |
| N                                 | -1.529863402809 | -0.861682197493 | -1.835525663046 |
| N                                 | -2.016137147191 | -1.587398812507 | -2.496563676954 |
|                                   |                 |                 |                 |
| dimethyl (diazomethyl)phosphonate |                 |                 |                 |
| C                                 | -0.327369121442 | 1.227772625462  | -0.676236393212 |
| H                                 | 0.159633159955  | 1.304559029194  | 0.284827740747  |
| P                                 | -0.327834542167 | 2.571768973640  | -1.831383007186 |
| O                                 | 0.335831192425  | 3.775061284605  | -1.271069366754 |
| O                                 | 0.293743947737  | 1.909280556977  | -3.151965749394 |
| C                                 | 0.300658722474  | 2.607545127286  | -4.420853127480 |
| H                                 | 0.818893022145  | 1.954863267415  | -5.119429357077 |
| H                                 | -0.721881271114 | 2.782497734318  | -4.756505871694 |

|   |                 |                 |                 |
|---|-----------------|-----------------|-----------------|
| H | 0.836843574714  | 3.553495049250  | -4.330803042363 |
| O | -1.845331924455 | 2.805327075617  | -2.334840190741 |
| C | -2.773313539165 | 3.563661275190  | -1.529390409851 |
| H | -2.385779164828 | 4.565761667820  | -1.342908305428 |
| H | -3.697235393498 | 3.619625359397  | -2.100775936723 |
| H | -2.958553288441 | 3.053979041256  | -0.580731090509 |
| N | -0.862557188225 | 0.076971419193  | -0.976307033577 |
| N | -1.337879726115 | -0.907621796620 | -1.258456488756 |

TS1 dimethyl (diazomethyl)phosphonate

|   |                 |                 |                 |
|---|-----------------|-----------------|-----------------|
| C | -2.751243860584 | 1.245913802151  | 1.805265503871  |
| C | -2.449732558110 | -0.828078805639 | 2.334503796339  |
| C | -3.455799454067 | -0.370451002323 | 3.138370575865  |
| N | -2.018246251445 | 0.188807547258  | 1.507433075109  |
| N | -3.633893359970 | 0.951101250329  | 2.788364143279  |
| H | -4.043437085316 | -0.848334510007 | 3.902852864358  |
| H | -2.011774702608 | -1.809962080437 | 2.294440873851  |
| H | -2.674400263447 | 2.215921858201  | 1.345281922329  |
| H | -4.301034182745 | 1.590947936513  | 3.190839466070  |
| N | 0.377922114255  | 1.683451660048  | 0.946738882067  |
| N | 0.545619576096  | -1.150788288108 | 1.291216884899  |
| N | -1.603590740621 | 1.340986374179  | -1.075364080832 |
| N | -1.468584845502 | -1.505999061486 | -0.710806160504 |
| C | 0.202341313484  | 3.004527003374  | 0.619753552484  |
| C | 0.543098911392  | -2.521129329579 | 1.260141245781  |
| C | 1.220886133922  | 1.665292257807  | 2.030417604465  |
| C | 1.390342511292  | -0.789207132080 | 2.306636602147  |

|   |                 |                 |                 |
|---|-----------------|-----------------|-----------------|
| C | -1.507176399048 | 2.703074120835  | -1.142800045561 |
| C | -1.212265103655 | -2.827470121531 | -0.462950325421 |
| C | -2.639716563436 | 0.985311030071  | -1.896794465420 |
| C | -2.523235015102 | -1.469738191155 | -1.581802308142 |
| C | 0.971733558003  | 3.843279875375  | 1.512281183645  |
| C | 1.430986521836  | -3.041555394404 | 2.277222389208  |
| C | 1.592375007039  | 3.014950845370  | 2.392850908100  |
| C | 1.946613414331  | -1.968120914239 | 2.933783625186  |
| C | -2.496181803309 | 3.228167163236  | -2.058688753752 |
| C | -2.129905438424 | -3.658012256060 | -1.212992068329 |
| C | -3.206621991374 | 2.163918378043  | -2.517324791541 |
| C | -2.950948896508 | -2.815941309454 | -1.895126247301 |
| H | 1.012156673401  | 4.921954310003  | 1.463033677858  |
| H | 1.610797990590  | -4.090840744517 | 2.463014376978  |
| H | 2.250051261194  | 3.275402327355  | 3.209664964648  |
| H | 2.640179467482  | -1.959033138546 | 3.762418272033  |
| H | -2.623882811800 | 4.274076487337  | -2.297787998531 |
| H | -2.141742585705 | -4.738417145736 | -1.195040060065 |
| H | -4.036205090973 | 2.159688481708  | -3.209895475027 |
| H | -3.769442988837 | -3.066702825705 | -2.554695585316 |
| C | -0.646560873323 | 3.480647832764  | -0.373944117218 |
| C | -0.251968144196 | -3.304260219228 | 0.426286043999  |
| C | -3.084244524443 | -0.314935050413 | -2.116249522039 |
| C | 1.686178434027  | 0.520664904420  | 2.670801049199  |
| H | -0.678206917062 | 4.553530214366  | -0.525287931037 |
| H | -0.154306756939 | -4.380097116129 | 0.518243115066  |
| H | -3.924271330831 | -0.441264894771 | -2.790082880437 |

|    |                 |                 |                 |
|----|-----------------|-----------------|-----------------|
| H  | 2.361343095471  | 0.662658002712  | 3.506933756811  |
| Fe | -0.492741217166 | 0.097780697499  | 0.074394439577  |
| C  | 0.814263846404  | -0.247939621128 | -1.349479398294 |
| H  | 1.102773852568  | -1.303525882530 | -1.348979675043 |
| P  | 0.907067274335  | 0.335034325171  | -3.098048185602 |
| O  | -0.244432592971 | -0.580724369297 | -3.744443724722 |
| O  | 0.839668603414  | 1.790740119238  | -3.358295708274 |
| O  | 2.294205831333  | -0.239538969638 | -3.723103627685 |
| C  | 2.590565124956  | -1.643222689774 | -3.841394289813 |
| H  | 2.814459359131  | -2.076309004342 | -2.863064089391 |
| H  | 1.758101473160  | -2.180193844954 | -4.299295775813 |
| H  | 3.471514956206  | -1.718799833758 | -4.476175993449 |
| C  | -0.945244655141 | -0.173007834005 | -4.941943342156 |
| H  | -1.325835671199 | 0.841642236058  | -4.830251060192 |
| H  | -0.281049855950 | -0.231714194022 | -5.806521733850 |
| H  | -1.769591812350 | -0.872516065729 | -5.058425363751 |
| N  | 2.404124568817  | 0.352901848871  | -0.855280625114 |
| N  | 3.031306070023  | 1.052621440432  | -0.276049905598 |

Intdimethyl (diazomethyl)phosphonate

|   |                |                 |                 |
|---|----------------|-----------------|-----------------|
| C | 2.640839854865 | -1.787005052077 | 2.137116556201  |
| C | 3.789956932686 | -1.580246428621 | 0.321132079174  |
| C | 4.595632313133 | -2.235740547485 | 1.209634107092  |
| N | 2.572515103886 | -1.304932013030 | 0.909855110277  |
| N | 3.847302131441 | -2.358868626797 | 2.361248542242  |
| H | 5.600157494665 | -2.614265261936 | 1.132239393390  |
| H | 4.003335601539 | -1.291572418723 | -0.693266251897 |



|   |                 |                 |                 |
|---|-----------------|-----------------|-----------------|
| H | 1.859111572435  | -1.744983064013 | 2.876244269169  |
| H | 4.141324602798  | -2.797839595407 | 3.220135724427  |
| N | 0.628163938983  | 0.709467199185  | 1.805380616877  |
| N | 2.115540153241  | 1.125643194741  | -0.626184730590 |
| N | -0.296742169511 | -1.786378787656 | 0.803761464893  |
| N | 1.163865896170  | -1.343116181483 | -1.645248923316 |
| C | -0.129190271488 | 0.342580872450  | 2.885832368457  |
| C | 2.804118543882  | 1.131264307825  | -1.809142955901 |
| C | 1.163306588941  | 1.934081402735  | 2.105967102723  |
| C | 2.449906722472  | 2.285645009357  | 0.021286522102  |
| C | -0.931263578334 | -1.824474861453 | 2.016163154736  |
| C | 1.979399758633  | -1.014634807844 | -2.694064618508 |
| C | -0.654337237000 | -2.930882206979 | 0.141526402874  |
| C | 0.609654499440  | -2.557176773602 | -1.953102579409 |
| C | -0.062241768681 | 1.363286729802  | 3.906875618041  |
| C | 3.598613854224  | 2.333446082396  | -1.914195212882 |
| C | 0.738146006246  | 2.349762756913  | 3.423277373886  |
| C | 3.374809669040  | 3.051942429471  | -0.782914465326 |
| C | -1.700731978396 | -3.042513958247 | 2.132710390741  |
| C | 1.930109623737  | -2.047594601932 | -3.703605727690 |
| C | -1.529299126330 | -3.727187455932 | 0.971694105607  |
| C | 1.076588082843  | -3.000930007736 | -3.246961361687 |
| H | -0.566030486108 | 1.314241396668  | 4.861395652482  |
| H | 4.239111554043  | 2.577391149026  | -2.749419295948 |
| H | 1.025531651554  | 3.275666986472  | 3.900166582253  |
| H | 3.794434416854  | 4.005837926840  | -0.498025324456 |
| H | -2.289810982086 | -3.318804901171 | 2.995162457322  |

|    |                 |                 |                 |
|----|-----------------|-----------------|-----------------|
| H  | 2.484296828218  | -2.030279749015 | -4.630888683510 |
| H  | -1.949746578120 | -4.680145602132 | 0.685349111801  |
| H  | 0.784842179851  | -3.925922567011 | -3.722588564115 |
| C  | -0.857066785763 | -0.837568648842 | 2.992489702064  |
| C  | 2.755349569448  | 0.134051147685  | -2.774182145091 |
| C  | -0.241804829202 | -3.289515788267 | -1.135325582535 |
| C  | 2.002366541050  | 2.671595170713  | 1.279228190437  |
| H  | -1.417047935268 | -0.997290161568 | 3.906366462583  |
| H  | 3.362155154659  | 0.267429487314  | -3.662070538274 |
| H  | -0.607609162883 | -4.232641379031 | -1.523898236141 |
| H  | 2.354757059661  | 3.624524671905  | 1.656807726345  |
| Fe | 0.819579231591  | -0.271098448663 | 0.037961710406  |
| C  | -0.658896398897 | 0.474306052780  | -0.556808221413 |
| H  | -1.475477568039 | 0.572574285602  | 0.170477109705  |
| P  | -1.330017310408 | 0.979119441689  | -2.145742822726 |
| O  | -2.221644369384 | -0.030969020379 | -2.776646359762 |
| O  | -2.177364982896 | 2.335699250869  | -1.854829836537 |
| C  | -1.553412770917 | 3.539024317026  | -1.363826198915 |
| H  | -2.339202946808 | 4.289863618345  | -1.306112521139 |
| H  | -1.128757181810 | 3.380377256493  | -0.369520759516 |
| H  | -0.769457250308 | 3.874644964033  | -2.045147630184 |
| O  | -0.082814556660 | 1.465977454743  | -3.034957372358 |
| C  | -0.213400943353 | 1.652589960118  | -4.459266777012 |
| H  | -0.921235919524 | 2.454744756964  | -4.680684581639 |
| H  | 0.776309065663  | 1.926181621658  | -4.818612849382 |
| H  | -0.541485779718 | 0.728321975214  | -4.935741320452 |

## TS2dimethyl (diazomethyl)phosphonate

|   |                 |                 |                 |
|---|-----------------|-----------------|-----------------|
| C | 2.619412575156  | -1.658027538978 | 2.059808563460  |
| C | 3.764701704052  | -1.440203042407 | 0.240962701648  |
| C | 4.571707343643  | -2.102225366639 | 1.123447656865  |
| N | 2.549951593535  | -1.168888141266 | 0.835904471850  |
| N | 3.826657745374  | -2.231763753075 | 2.276613057779  |
| H | 5.575537406181  | -2.481473374581 | 1.040966847934  |
| H | 3.973775518871  | -1.144027153629 | -0.772226139600 |
| H | 1.838836899525  | -1.618061935424 | 2.800039727651  |
| H | 4.122994279623  | -2.675629005383 | 3.132000818982  |
| N | 0.855642816499  | 0.963307995917  | 1.652358146765  |
| N | 2.189960810822  | 1.084622411817  | -0.891939885709 |
| N | -0.324953322306 | -1.526317572421 | 0.916341867123  |
| N | 1.050295610901  | -1.419425862753 | -1.593799935471 |
| C | 0.074254888637  | 0.791690940798  | 2.763504603566  |
| C | 2.702983553725  | 1.004297391186  | -2.155879324985 |
| C | 1.647926646279  | 2.051296332345  | 1.894045822274  |
| C | 2.811939185826  | 2.143787419742  | -0.288975934444 |
| C | -0.952760548963 | -1.368030560252 | 2.123490169172  |
| C | 1.702844739357  | -1.167576796766 | -2.773267725881 |
| C | -0.654918459971 | -2.777652362101 | 0.468940887759  |
| C | 0.541040551336  | -2.688667560683 | -1.698087454464 |
| C | 0.365536545821  | 1.824583782446  | 3.734380775464  |
| C | 3.652310258093  | 2.073882338573  | -2.378442901348 |
| C | 1.352470096433  | 2.593821837416  | 3.202278644011  |
| C | 3.733224547912  | 2.769363775252  | -1.213624029127 |
| C | -1.725129302480 | -2.549736291053 | 2.438558303652  |

|    |                 |                 |                 |
|----|-----------------|-----------------|-----------------|
| C  | 1.584988664610  | -2.305841385771 | -3.657238628268 |
| C  | -1.529688081227 | -3.429460637390 | 1.418657982606  |
| C  | 0.877885920150  | -3.252826713150 | -2.986018163161 |
| H  | -0.114587023890 | 1.920382981784  | 4.697748940848  |
| H  | 4.191499351852  | 2.240467954657  | -3.299785441358 |
| H  | 1.841089066686  | 3.453204478852  | 3.638709784038  |
| H  | 4.350093008088  | 3.627027535924  | -0.986257368127 |
| H  | -2.315478337705 | -2.682287901821 | 3.333952425215  |
| H  | 2.006322624222  | -2.361270446718 | -4.650636483447 |
| H  | -1.932839197720 | -4.425725990332 | 1.306076086894  |
| H  | 0.595845272951  | -4.241236465806 | -3.319265319855 |
| C  | -0.800224705371 | -0.271530686176 | 2.970232995302  |
| C  | 2.441978467724  | -0.023947341400 | -3.056029005265 |
| C  | -0.233243255868 | -3.331290391515 | -0.737183828738 |
| C  | 2.583984627575  | 2.579032326807  | 1.011414304650  |
| H  | -1.356003671793 | -0.283176325129 | 3.900977718243  |
| H  | 2.910157207036  | 0.035854307718  | -4.031642930253 |
| H  | -0.568609608065 | -4.336654672398 | -0.965130277997 |
| H  | 3.155769616484  | 3.434469495419  | 1.353195834797  |
| Fe | 0.861385484639  | -0.180269266352 | -0.032243287955 |
| C  | -0.674460950646 | 0.819482776271  | -0.543065800160 |
| H  | -1.491512849470 | 0.728696775926  | 0.178133323311  |
| P  | -0.830985425721 | 2.432103133776  | -1.378784649090 |
| O  | 0.027130068373  | 3.416977859030  | -0.429696171203 |
| O  | -0.512590814197 | 2.502637436551  | -2.830053788750 |
| O  | -2.358986974660 | 2.989356746997  | -1.171882160392 |
| C  | -2.912342996887 | 3.261441013261  | 0.125078338446  |

|   |                 |                 |                 |
|---|-----------------|-----------------|-----------------|
| H | -3.106158191544 | 2.334302324489  | 0.670476367344  |
| H | -2.244005213383 | 3.895086491009  | 0.711689987173  |
| H | -3.856143913123 | 3.778621648725  | -0.042178813405 |
| C | 0.385481983295  | 4.737388955719  | -0.880699538977 |
| H | 0.944522152673  | 4.683222536378  | -1.815550208052 |
| H | -0.506249338529 | 5.354161953240  | -1.018956182914 |
| H | 1.010447851684  | 5.164939016856  | -0.098959916607 |
| C | -1.790543630114 | -0.354037488873 | -2.042365923213 |
| H | -1.691211476051 | -1.245122223322 | -1.443582325021 |
| H | -1.029763157701 | -0.186959658250 | -2.790903563326 |
| C | -2.999843883886 | 0.270662473887  | -2.173412560760 |
| H | -3.077069477241 | 1.070157040194  | -2.902777293047 |
| C | -4.212902998901 | 0.011413831261  | -1.415936963067 |
| C | -4.300789770625 | -0.975220699558 | -0.412772825734 |
| H | -3.435661385361 | -1.578238200096 | -0.165427592642 |
| C | -5.361370858660 | 0.774897659746  | -1.701917076815 |
| H | -5.305616648199 | 1.540335481108  | -2.468128209900 |
| C | -5.491085709431 | -1.184449629937 | 0.269659984014  |
| H | -5.540755248250 | -1.946254186183 | 1.039259068185  |
| C | -6.553626180187 | 0.559009454242  | -1.020719235585 |
| H | -7.427547316348 | 1.154572790763  | -1.258505804106 |
| C | -6.622532045505 | -0.421387420636 | -0.031502018757 |
| H | -7.550394715666 | -0.591666657858 | 0.502546479955  |

cyclopropane

|   |                 |                |                 |
|---|-----------------|----------------|-----------------|
| C | -1.381817563985 | 0.621683503068 | -1.529641278530 |
| H | -1.131566511866 | 0.028849809229 | -0.656967730730 |

|   |                 |                 |                 |
|---|-----------------|-----------------|-----------------|
| P | -0.253094257273 | 1.963176067638  | -1.885845149927 |
| O | -0.504834338924 | 2.694125283891  | -3.151796981444 |
| O | -0.294505476662 | 2.993430297074  | -0.639708068966 |
| C | -0.040098288759 | 2.583856315478  | 0.719184552435  |
| H | 0.030053635583  | 3.497140777822  | 1.306409519925  |
| H | -0.864360718046 | 1.974168962753  | 1.095878260778  |
| H | 0.896824078724  | 2.027787516744  | 0.789484203712  |
| O | 1.174979112356  | 1.215004583209  | -1.770059233050 |
| C | 2.383566715021  | 1.858380293098  | -2.236283864545 |
| H | 3.186982204587  | 1.140669734316  | -2.085347276145 |
| H | 2.296056046977  | 2.105690272316  | -3.294695976740 |
| H | 2.584694192927  | 2.764082266612  | -1.660172371970 |
| C | -2.066087152187 | -0.095569895808 | -2.669227470138 |
| H | -2.217359659870 | -1.161856486225 | -2.554557032423 |
| H | -1.847039590240 | 0.233921013264  | -3.677024402749 |
| C | -2.870490856766 | 0.836857731137  | -1.802806636926 |
| H | -3.112582883279 | 1.786011020327  | -2.268020647231 |
| C | -3.900717717019 | 0.359484325732  | -0.834443203973 |
| C | -3.804444776029 | -0.873590661694 | -0.174813006045 |
| H | -2.957728065488 | -1.526698207418 | -0.357827955085 |
| C | -5.013090677960 | 1.167571115904  | -0.569527262556 |
| H | -5.105279280819 | 2.125223059917  | -1.070990904419 |
| C | -4.788924645101 | -1.282577863612 | 0.720489152014  |
| H | -4.694885150502 | -2.240935415121 | 1.219050535155  |
| C | -6.000045450738 | 0.759178906033  | 0.325586138298  |

|   |                 |                 |                |
|---|-----------------|-----------------|----------------|
| H | -6.852958355399 | 1.401694983534  | 0.513838908245 |
| C | -5.892118373292 | -0.468207385332 | 0.975212525695 |
| H | -6.658397765972 | -0.788459313884 | 1.671801117336 |

## References

- (1) Frisch, M. J.; Trucks, G. W.; Schlegel, H. B.; Scuseria, G. E.; Robb, M. A.; Cheeseman, J. R.; Scalmani, G.; Barone, V.; Petersson, G. A.; Nakatsuji, H.; Li, X.; Caricato, M.; Marenich, A. V.; Bloino, J.; Janesko, B. G.; Gomperts, R.; Mennucci, B.; Hratchian, H. P.; Ortiz, J. V.; Izmaylov, A. F.; Sonnenberg, J. L.; Williams-Young, D.; Ding, F.; Lipparini, F.; Egidi, F.; Goings, J.; Peng, B.; Petrone, A.; Henderson, T.; Ranasinghe, D.; Zakrzewski, V. G.; Gao, J.; Rega, N.; Zheng, G.; Liang, W.; Hada, M.; Ehara, M.; Toyota, K.; Fukuda, R.; Hasegawa, J.; Ishida, M.; Nakajima, T.; Honda, Y.; Kitao, O.; Nakai, H.; Vreven, T.; Throssell, K.; Montgomery, J. A.; Peralta, Jr., J. E.; Ogliaro, F.; Bearpark, M. J.; Heyd, J. J.; Brothers, E. N.; Kudin, K. N.; Staroverov, V. N.; Keith, T. A.; Kobayashi, R.; Normand, J.; Raghavachari, K.; Rendell, A. P.; Burant, J. C.; Iyengar, S. S.; Tomasi, J.; Cossi, M.; Millam, J. M.; Klene, M.; Adamo, C.; Cammi, R.; Ochterski, J. W.; Martin, R. L.; Morokuma, K.; Farkas, O.; Foresman, J. B.; Fox, D. J. *Gaussian 16, Revision C.01*; Gaussian, Inc.: Wallingford CT, 2016.
- (2) a) Becke, A. D. Density-functional exchange-energy approximation with correct asymptotic behavior. *Phys. Rev. A*. **1988**, *38* (6), 3098–3100. b) Becke, A. D. Density - functional thermochemistry. III. The role of exact exchange. *J. Chem. Phys.* **1993**, *98* (7), 5648–5652. c) Lee, C.; Yang, W.; Parr, R. G. Development of the Colle-Salvetti correlation-energy formula into a functional of the electron density. *Phys. Rev. B*. **1988**, *37* (2), 785–789.
- (3) Hehre, W. J.; Ditchfield, R.; Pople, J. A. Self-Consistent Molecular Orbital Methods. XII. Further Extensions of Gaussian-Type Basis Sets for Use in Molecular Orbital Studies of Organic Molecules. *J. Chem. Phys.* **1972**, *56* (5), 2257–2261.
- (4) Andrae, D.; Häußermann, U.; Dolg, M.; Stoll, H.; Preuß, H. Energy-adjusted *ab initio* pseudopotentials for the second and third row transition elements. *Theor. Chim. Acta*. **1990**, *77* (2), 123–141.
- (5) Miertus, S.; Scrocco, E.; Tomasi, J. Electrostatic interaction of a solute with a continuum—a direct utilization of *ab initio* molecular potentials for the prevision of solvent effects. *Chem. Phys.* **1981**, *55* (1), 117–129.
- (6) a) Grimme, S.; Antony, J.; Ehrlich, S.; Krieg, H. A consistent and accurate *ab initio* parametrization of density functional dispersion correction (DFT-D) for the 94 elements H-Pu. *J. Chem. Phys.* **2010**, *132* (15), 154104. b) Grimme, S.; Ehrlich, S.; Goerigk, L. *J. Comput. Chem.* **2011**, *32* (7), 1456–1465.



- (7) Weigend, F.; Ahlrichs, R. Balanced basis sets of split valence, triple zeta valence and quadruple zeta valence quality for H to Rn: Design and assessment of accuracy. *Phys. Chem. Chem. Phys.* **2005**, *7* (18), 3297–3305.
- (8) Legault, C. Y. CYLview, 1.0b; Université de Sherbrooke: Québec, Montreal, Canada, 2009. URL <http://www.cylview.org>.
- (9) Alford, R. F.; Leaver-Fay, A.; Jeliazko, J. R.; O'Meara, M. J.; DiMaio, F. P.; Park, H.; Shapovalov, M. V.; Renfrew, P. D.; Mulligan, V. M.; Kappel, K.; Labonte, J. W.; Pacella, M. S.; Bonneau, R.; Bradley, P.; Dunbrack, R. L.; Das, R.; Baker, D.; Kuhlman, B.; Kortemme, T.; Gray, J. J. The Rosetta all-atom energy function for macromolecular modeling and design. *J. Chem. Theory Comput.* **2017**, *13* (6), 3031–3048.
